# Supplementary material for: The association of wrist circumference with hypertension in northeastern Chinese residents in comparison with other anthropometric obesity indices
Source: PeerJ. 2019 Aug 28;7:e7599. doi: 10.7717/peerj.7599 (PMC6717503; doi:10.7717/peerj.7599)
Supplement: Data S1 [file peerj-07-7599-s001.xlsx]

## Sheet: Sheet1
id	gender	age	height	weight	history1	htnmed1	diamed1	hlipmed1	history2	htnmed2	diamed2	hlipmed2	history3	htnmed3	diamed3	hlipmed3	history4	htnmed4	diamed4	hlipmed4	actsmok	drinking	sbp	dbp	glu	tg	tc	ldl	hdl	waist	hip	neck	wrist	arm	shoulder
010101	1	52	161	61																	6	1	125	75	5.74	4.68	4.39	4.76	0.94	78	90	32	16	11	17
010102	1	65	170	62																	4	1	125	75	4.89	3.05	3.96	2.39	1.02	76	90	32	16	11	17
010103	2	65	160	52																	6	3	120	80	6.38	0.78	5.53	3.32	1.76	73	90	30	16	16	15
010104	2	53	162	65																	6	3	120	80	5.45	3.32	6.88	4.42	1.74	82	98	32	15	22	20
010105	2	58	163	68																	6	3	125	80	5.49	5.99	5.46	3.11	1.45	93	110	34	16	46	32
010106	2	52	162	64																	6	3	125	80	5.96	6.08	7.03	4.62	1.39	87	94	33	18	22	23
010107	2	45	170	61																	6	1	130	80	5.58	1.16	6.32	4.19	1.6	79	99	33	15	16	26
010108	2	55	150	55	4		1														6	3	125	75	6.47	0.75	4.92	3.07	1.51	78	96	34	15	30	42
010109	2	41	162	65																	6	3	120	70	5.92	1.6	7.59	3.93	2.21	76	96	32	16	22	22
010110	2	59	168	65																	6	3	130	80	5.45	1.75	6.3	2.98	2.19	80	98	33	18	32	21
010111	1	44	180	85	1	1	1		4		1										3	2	160	100	8.08	5.32	6.08	3.26	1.52	105	110	42	19	34	42
010112	1	43	174	74	1	0															3	1	150	100	5.74	8.89	6.61	2.78	1.99	103	110	41	19	34	40
010113	1	46	175	80																	6	3	140	85	5.17	2.27	5.57	3.12	1.5	106	112	42	16	22	40
010114	2	45	170	70	1	1															6	3	140	90	5.72	1.11	6.04	3.76	1.78	85	105	36	16	23	23
010115	2	67	160	75	4		0														3	3	140	85	7	0.88	5.2	2.8	1.2	95	98	34	18	26	40
010116	1	70	176	87.5	1	1			3				4		1						3	1	160	100	8.59	1.21	5.27	2.84	1.3	98	96	32	18	18	23
010117	2	54	158	56	2																6	3	135	75	5.1	1.08	5.6	3.53	1.58	73	95	31	16	27	17
010118	1	60	176	70	1	1															6	1	125	75	6.67	2.92	5.22	3.08	1.24	103	110	41	20	34	40
010119	2	60	162	65																	6	3	120	70	5.87	0.99	4.85	2.57	1.26	86	96	33	18	32	21
010120	1	51	173	88	1	1															3	3	135	70	5.98	1.87	5.21	2.96	1.34	103	110	42	19	34	40
010121	2	53	160	68																	6	1	120	80	5.38	2.18	6.91	4.23	1.69	86	109	35	17	33	42
010122	2	49	163	65																	6	3	135	85	5.33	1.15	5.44	3.13	1.58	80	105	33	15	30	38
010123	1	45	170	60	1	1															6	1	120	80	5.2	1.75	5.03	2.74	1.49	85	98	36	15	18	22
010124	2	59	156	50																	6	3	125	80	4.94	1.29	5.68	3.51	1.58	75	96	30	12	19	23
010125	1	63	180	75																	6	1	130	70	5.83	7.23	6.48	2.03	1.54	95	104	38	17	9	12
010126	2	59	165	70																	6	3	120	70	5.72	2.26	4.76	2.34	1.21	95	104	38	17	9	12
010127	1	73	171	60	1	1			2				3				4		1		6	3	160	90	5.11	0.58	4.19	2.41	1.52	83	95	33	14	18	20
010128	2	52	160	55																	6	1	125	85	5.69	0.83	4.75	2.24	2.13	78	98	30	15	36	26
010129	2	42	160	53																	6	3	125	85	5.15	0.9	4.54	1.84	2.01	73	90	32	14	28	36
010130	2	52	170	60	6																6	1	130	80	5.26	1.14	6.22	3.87	1.76	75	99	31	14	16	22
010131	1	62	175	80																	6	3	120	85	5.66	3.29	3.59	2.08	1	78	99	31	14	16	22
010132	2	61	164	60	1	1															6	3	140	80	5.61	1.96	5.95	3.83	1.5	73	99	31	14	16	22
010133	1	57	172	66																	6	1	110	80	7.86	5.06	5.36	3.14	1.16	89	100	40	17	14	28
010134	2	46	162	50																	6	3	100	70	4.94	0.68	3.65	1.87	1.57	70	90	36	17	27	29
010135	2	70	152	72																	6	3	130	80	7.77	2.75	7.63	4.77	1.77	93	105	33	18	27	40
010136	1	73	174	85																	3	3	150	80	5.6	2.51	5.36	3.48	1.19	102	108	41	17	26	40
010137	2	44	156	52																	6	3	110	75	5.13	1.1	4.29	2.17	1.62	73	92	30	16	22	32
010138	1	46	175	85																	3	3	120	85	7.8	1.94	5.53	3.82	1.11	103	107	43	19	30	42
010139	1	46	170	85																	4	1	125	75	5.8	11.05	7.53	4.84	1.4	105	111	42	18	32	37
010140					1	1																								104	109	42	19	31	37
010141	1	54	173	70																	4	1	130	80	5.36	1.93	5.46	3.27	1.63	84	92	32	17	26	30
010142	2	46	156	66	1	1															6	1	135	85	8.32	2.76	5.69	3.87	1.46	86	94	32	16	28	32
010143	1	48	173	70																	6	1	130	80	5.92	3.2	5.42	2.8	1.57	84	94	33	32	18	21
010144	1	45	174	69																	3	1	120	80	4.76	2.15	5.47	2.84	1.61	86	94	30	17	26	28
010145	1	68	178	85	1	1															6	2	140	90	5.81	1.75	3.84	1.98	1.12	110	134	36	20	15	17
010146	2	47	167	65	1	1															6	3	130	90	7.24	2.14	4.55	2.07	1.83	92	110	34	17	15	17
010201	2	66	157	60	4		1														6	3	130	70	18.41	1.48	5.19	3.14	1.38	81	99	32	16	16	22
010202	2	68	165	65	6																5	3	100	70	4.4	0.64	4.97	2.66	1.79	81	101	31	17	34	20
010203	2	63	150	58																	6	3	120	80	5.23	2.25	6.06	3.81	1.46	88	100	34	15	27	31
010204	2	67	159	65																	6	3	130	80	4.94	1.35	4.65	2.52	1.24	88	100	34	15	27	31
010205	1	71	165	65	1	1															6	3	135	95	12.53	1.36	4.48	1.19	2.48	87	98	35	15	23	33
010206	1	65	170	80	1	1			3												4	1	160	110	5.28	2.76	6.1	3.43	1.42	103	110	40	18	10	24
010207	2	64	162	55																	6	3	150	90	5.38	2.95	6.4	3.52	1.54	78	95	32	15	20	30
010208	2	79	155	43																	6	3	130	65	5.26	0.93	6.73	4.31	1.86	68	87	87	13.5	12	10
010209	1	76	170	48	1	0			2				4		0						6	3	120	80	6.49	1.37	5.38	3.14	1.15	101	112	39	19	19	26
010210	2	68	167	70	1	1															6	3	150	80	6.7	4.69	5.35	3.28	1.39	91	105	36	16	19	25
010211	1	74	170	70	1	0			2												6	3	135	85	4.69	3.61	4.91	2.36	1.63	86	98	40	18	13	35
010212	2	69	157	60	6																6	3	100	60	6.4	2.03	6.44	4.21	1.33	85	95	40	18	13	35
010213	2	66	160	60	2																6	3	130	85	5.32	1.14	5.7	3.69	1.49	80	90	34	17	10	14
010214	2	80	156	55	1	1															6	3	160	80	5.32	1.14	5.7	3.69	1.49	85	94	32	16	16	20
010215	2	47	160	50																	6	3	120	80	6.03	1.49	5.96	3.42	1.86	75	93	31	16	23	28
010216	1	56	170	80																	1	1	120	85	8.5	2.43	6.74	4.1	1.54	85	100	32	17	25	32
010217	2	55	165	55	1	1															6	3	110	70	5.08	1.07	5.39	3.3	1.42	75	94	31	16	22	27
010218	1	38	178	77																	4	1	120	70	5.03	0.99	3.71	2.05	1.22	84	113	42	20	28	35
010219	2	63	160	67	1	1															6	3	130	80	6.53	1.87	4.2	2.3	1.37	79	94	32	16	21	27
010220	2	36	160	47.5																	6	3	100	60	4.48	1.28	6.03	3.82	1.57	67	86	30	15	20	21
010221	2	68	157	58																	6	3	130	70	5.88	4.82	5.18	3.07	1.37	79	95	32	15	20	26
010222	1	46	173	62																	6	1	130	80	4.98	0.77	5.21	2.98	1.5	89	97	35	18	23	26
010223	2	45	159	53																	6	3	120	75	5.51	1.73	5.26	3.06	1.4	79	94	32	16	21	27
010224	2	44	154	54	1	1															6	3	135	88	5.79	0.89	4.96	2.94	1.2	77	95	31	14	20	26
010225	2	37	160	50																	6	1	120	75	5.21	0.77	0.57	4.13	2.11	75	88	30	14	20	25
010226	1	42	172	70																	2	1	128	82	5.92	6.35	3.7	1.71	0.97	89	96	39	17	23	22
010227	2	42	163	70																	6	1	135	86	5.74	2.19	5.1	2.88	1.44	96	103	33	18	37	47
010228	1	47	169	75	1	1			2												1	1	145	90	4.91	2.13	4.71	2.41	1.43	96	102	42	18	31	29
010229					1	1																								83	94	36	17	14	18
010230	1	49	168	60																	2	1	125	80	5.1	2.39	4.17	2.1	0.88	82	90	36	17	15	19
010231	2	71	148	47	1	1															6	1	140	85	4.56	2.42	6.91	4.23	1.58	80	89	31	15	18	30
010232	1	77	166	60	1	1			2												6	1	140	80	4.71	0.98	4.6	2.95	1.2	84	92	38	17	16	18
010233	1	50	176	85																	6	1	130	80	5.83	4.5	7.06	3.63	1.38	95	97	38	17	30	30
010234	2	47	169	63																	6	3	110	70	4.99	1.15	6.02	3.56	1.57	78	95	32	15	20	24
010235	2	60	168	67.5																	6	1	130	85	1.87	1.56	6.44	4.17	1.56	87	97	34	16	20	26
010236	2	57	158	62.5																	6	3	135	80	5.14	1.38	5.9	3.58	1.69	87	97	34	16	20	20
010237	2	72	165	72																	6	3	100	70	5.22	1.18	6.38	4.07	1.77	86	99	34	18	24	32
010238	2	42	155	55																	6	3	100	70	4.56	3.35	4.7	2.19	1.4	74	89	33	15	15	21
010239	2	56	164	60.5																	6	1	130	80	5.93	0.9	6.94	4.53	1.91	84	92	35	16	15	23
010240	2	53	165	58	1	0			2				4		0						6	3	120	85	6.64	1.11	5.46	3.17	1.87	80	89	30	15	21	26
010241	1	37	183	87																	3	1	120	80	5.06	2.81	6.61	3.62	1.95	96	115	35	19	15	17
010242	2	43	160	49																	6	3	130	80	5.41	1.77	5.04	2.48	1.58	75	84	30	15	16	23
010243	2	44	164	58																	6	1	120	80	4.96	1.35	5.68	2.97	1.82	72	94	32	15	13	15
010244																														86	95	36	17	23	13
010301	2	79	152	43	1	1															6	3	125	70	4.59	2.4	5.14	3.15	1.76	78	89	31	15	18	16
010302	2	78	164	58	1	1															6	3	125	85	5.47	1.65	3.9	2.24	1.56	88	103	32	16	20	26
010303	2	77	150	60																	6	3	158	80	5.71	0.47	4.47	3.04	2.06	91	101	35	15	22	24
010304	2	78	168	55	1	1			2				3								6	3	150	100	6.56	1.46	7.64	5	1.56	94	108	39	6	19	21
010305	2	67	160	57	2																6	3	130	80	5.7	0.91	5.08	3.28	1.65	82	101	34	17	20	20
010306	1	73	172	63	1	1			2												6	3	131	81	6.51	1.48	5.61	3.65	1.85	94.5	98	36.5	17	28	32
010307	2	70	155	65	1	1			2				4		0						6	3	135	80	7.26	3.86	7.36	5.39	1.51	87	111	35	16	20	14
010308	2	67	155	60.3	4		1														6	3	130	80	8.39	2.59	5.28	2.94	1.16	91	103	35	16	20	18
010309	1	78	176	66	1	0			3				4		0						6	3	130	80	11.8	1.41	4.64	2.64	1.55	102	113	40	18	30	25
010310	2	75	157	61	2																3	3	130	80	4.79	1.78	5.1	3	1.52	92	100	32	17	21	30
010311	2	69	160	65	2																6	3	135	85	5.34	1.46	5.98	3.42	1.43	93	106	35	18	23	12
010312	2	65	154	57	1	1															6	3	125	70	4.91	1.28	6.16	3.76	1.96	96	105	36	18	30	18
010313	2	72	155	60	2				1	1											6	3	130	80	6.68	1.82	8.41	5.72	1.42	87	101	36	17	30	21
010314	2	72	155	52																	6	3	125	80	5.45	1.36	3.6	2.33	1.43	78	97	32	17	19	14
010315	2	70	154	55	1	1			2												6	3	130	80	5.56	1.53	6.32	4.42	1.65	85	16	34	17	20	25
010316	2	64	156	70	1	1															6	3	128	70	5.38	2.9	7.04	3.95	1.77	94	108	40	7.5	20	24
010317	1	63	168	70	1	0															6	3	130	80	6.61	3.01	4.29	1.91	1.01	90	100	42	18	12	20
010318	1	76	175	62																	3	3	125	80	5.71	0.88	4.96	2.99	1.18	88	102	38	17	20	10
010319	2	70	154	51.5	2																6	3	132	85	5.39	0.84	4.22	1.93	1.96	80	97	33	15	20	16
010320																														87	102	35.5	17	20	18
010321	2	66	156	62																	6	1	120	80	5.34	0.76	4.76	2.64	1.49	91	103	35	17	19	16
010322	2	64	156	60	1	0			2												6	3	130	80	5.5	4.4	5.27	2.51	1.63	90	95	37	7	30	28
010323	2	75	162	62																	6	3	130	80	5.72	1.21	5.75	3.22	1.77	88	100	37	17	20	20
010324	2	71	160	51	1	0			2												6	3	161	87	4.82	1.79	4.59	1.96	1.61	72	84	31	15	16	12
010325	2	61	161	58																	6	1	130	80	5.54	0.92	5.57	3.92	1.82	82	98	36	16	24	24
010326	2	61	160	60																	6	3	130	80	5.24	0.73	7.06	4.28	2.33	83	102	34	16	30	24
010327	1	61	172	85	4		0														6	3	123	80	7.53	2.19	5.91	3.57	1.09	104	107	42	21	28	30
010328	1	64	165	56																	6	1	125	75	5.8	3.97	6.52	3.6	1.83	103	106	43	20	30	24
010329	2	61	169	65																	6	3	120	70	5.1	0.63	4.42	2.1	1.74	87	100	35	18	28	24
010330	1	61	174	65																	6	3	129	73	5.3	1.97	6.24	3.53	1.63	86	96	36	16	20	18
010331	1	48	172	65																	6	3	130	80	6.32	2.28	4.03	2.65	0.89	128	118	45	20	30	32
010332	2	66	156	52																	6	1	132	74	5.38	1.92	6.16	3.66	1.58	76	90	30	14.8	36	35
010333	1	69	170	80																	6	1	126	80	5.34	4.98	4.53	1.3	0.97	102	109	41	20	22	24
010334	1	75	166	60	1	1			2												6	1	130	80	4.73	1.1	5.14	3.12	1.66	86	101	37	17	20	12
010335	2	68	159	56	2																6	3	128	75	5.59	2.99	6.92	4.29	1.42	89	97	35	17	26	20
010336	2	77	154	42																	6	3	135	85	5.07	1.09	5.1	2.39	2.34	74	82	32	4	10	16
010337	2	65	164	61																	6	3	130	70	6.13	2	7.04	4.23	1.9	87	105	37	16	24	20
010338	1	46	175	90	1	0															6	3	123	75	5.36	3.86	6.51	3.57	1.19	111	113	41	19	24	30
010339	1	57	170	72.5	1	1	1		4		1										2	3	120	80	13.96	3.13	4.83	2.87	1.21	96	101	38	19	24	22
010340	2	54	164	64	1	0															6	3	130	70	7	2.04	5.81	3.37	1.36	101	117	40	20	30	34
010401	1	94	173	58																	6	1	130	70	4.99	0.79	5.67	3.29	1.06	83	96	40	17	18	16
010402	2	57	165	55	3																6	3	125	70	5.96	1.85	5.06	2.54	1.68	73	96	32	16	24	20
010403	1	60	170	75																	3	1	125	80	4.91	1.47	5.02	2.65	1.17	85	98	39	17	16	18
010404					1	1																								81	102	31	16	10	12
010405	2	73	164	62	1	1															6	3	125	80	5.49	2.04	5.95	3.63	1.69	91	102	36	16	24	26
010406	1	76	172	70	1	1															6	3	130	80	5.25	2.66	5.82	3.55	1.45	95	101	41	18	26	22
010407	2	78	156	64	1	1			2												6	3	130	80	5.44	1.66	7.52	4.91	2.23	95	97	34	18	22	18
010408	2	61	163	52.5																	6	3	125	70	5.85	1.19	6.83	4.32	2.57	78	96	34	15	18	20
010409	1	60	165	60	4		1														6	3	130	70	8.58	174	3.79	1.93	0.87	85	100	41	17	18	24
010410	2	73	162	64																	6	3	125	80	6.4	2.49	6.53	4.7	2.25	88	102	36	18	26	24
010411	2	62	154	55	4		1														6	3	124	73	8.8	3.45	8.05	4.79	2.22	81	93	34	17	29	22
010412	2	67	164	75	1	1			4		0										6	3	135	80	7.64	1.49	5.93	3.95	1.51	99	109	38	19	32	30
010413	1	67	174	60																	6	3	130	75	5.98	1.02	4.65	2.97	1.2	86	99	37	18	28	26
010414	2	54	165	50																	6	3	122	67	5.27	1.67	5.13	2.35	2.1	74	95	33	17	12	12
010415	2	67	158	69																	6	3	125	75	6.05	2.39	5.59	2.83	1.61	104	109	38	17	24	22
010416	2	64	158	65																	6	3	135	70	5.12	0.95	5.73	3.16	1.72	97	112	38	17	28	20
010417	1	65	169	62.5																	6	3	130	70	4.46	1	4.13	1.91	1.34	86	95	37	17	18	10
010418	2	63	170	60	2																6	3	121	68	5.06	0.88	4.85	2.11	1.67	83	95	32	16	16	10
010419	1	77	170	65	1	1	1		4		1										6	3	130	82	9.34	0.65	4.25	2.34	1.07	90	100	36	17	24	20
010420	2	65	162	62																	6	3	130	80	5.69	1.83	5.57	3.54	1.41	95	104	34	17	28	35
010421	2	66	164	64	4		0														6	3	130	85	9.17	1.45	7.06	3.88	1.73	94	99	38	18	30	28
010422	1	67	173	65	1	1															6	3	135	80	5.7	0.86	5.96	3.2	2.66	89	103	37	18	15	12
010423	2	60	164	60																	6	3	125	70	5.77	1.18	7.4	4.81	2.05	82	102	36	17	24	24
010424	2	65	150	55	1	1															6	3	125	75	4.82	0.94	5.25	2.99	1.74	85	101	34	16	26	32
010425	2	65	158	59	1	0															6	3	130	75	6.63	2.51	4.53	2.59	1.03	92	101	32	17
010426	2	60	167	62.5																	6	3	125	70	4.97	1.03	5.51	2.73	2.11	79	100	33	16	20	16
010427	2	66	162	60	4		1														6	3	125	70	7.48	5.1	5.33	2.87	1.49	82	93	34	16	20	30
010428	2	38	161	52																	4	3	120	80	4.68	1.76	4.32	2.18	1.59	71	94	34	16	18	18
010429	1	39	170	75																	4	3	130	70	5.47	2.79	5.65	3.43	1.2	93	103	42	19	30	24
010430	1	66	173	55																	3	1	130	70	5.18	0.69	4.78	2.25	2.14	80	80	36	17	20	12
010431	2	60	160	55																	6	3	130	73	4.96	1.33	5.1	2.79	2.13	82	93	32	16	30	20
010432	2	60	160	50																	6	3	125	80	6	1.06	5.93	3.73	2.22	73.5	85	31	16	25	14
010433					1	1																								73	82	30	15	10	18
010434	2	60	163	55																	6	3	125	70	5.03	0.65	5.89	3.53	2.42	84	100.5	29.5	14.5	30	24
010435	2	60	161	55																	6	3	130	80	5.46	1.05	4.29	1.7	1.75	86.5	97	33	15	30	22
010436	2	60	160	52																	6	3	130	80	6.54	2.03	8.61	5.18	2.18	85.5	75	32	14.5	29	22
010437	2	60	155	60																	6	3	135	85	5.79	1.1	7.79	4.67	2.66	72.5	90.5	31	15	29	15
010438	2	60	157	63	1	1			2				4		1						6	3	135	75	9.32	2.67	5.26	2.54	1.83	86	98	37	18	34	30
010439	2	62	161	58																	6	3	115	70	5.48	1.72	6.38	3.49	1.78	74.5	96	32	16	24	30
010440	2	62	165	65	1	1	1		4		1										6	3	130	75	10.23	1.43	5.52	2.81	1.69	108	100	39	17	26	28
010441	2	48	170	74																	4	3	125	75	5.31	0.76	5.01	2.41	1.77	77	104	36	16	24	12
010501					1	1	1		4		1																			97	109	44	18	58	55
010502					1	1																								100	118	44	18	70	60
010503	2	72	156	53	4		0														6	3	125	85	6.13	2.45	7.76	5.2	1.79	80	91	35	17	40	35
010504	2	65	168	70	1	1															6	3	140	90	6.12	2.46	5.77	3.29	1.32	98	98	38	18	42	50
010505	1	65	175	70	4		1														4	3	131	82	11.48	1.06	4.33	2.24	1.05	92	97	38	17	40	50
010506	2	70	162	78	1	0	1		4		1										4	3	150	80	9.91	1.8	6.36	3.93	1.12	102	103	41	18	50	49
010507	1	73	163	62	2		1		4		1										5	3	130	80	10.5	3.27	6.13	3.69	1.09	98	94	39	18	50	40
010508	2	71	161	58	1	1															6	1	152	73	6.46	1.75	6.86	4.52	1.72	84	94	35	18	50	45
010509	2	77	157	53.5	1	1			2												6	3	162	85	5.04	1.24	5.46	3.09	1.6	74	90	36	18	45	30
010510	2	77	167	71	1	0															6	3	186	76	6.45	1.19	6.21	3.95	1.45	101	99	39	19	50	55
010511	2	70	160	50	1	0															6	3	160	78	5.31	1.87	7.87	5.04	2.21	72	92	30	18	50	34
010512	2	65	158	68																	6	3	150	70	5.33	0.66	5.81	3.5	1.52	81	108	32	19	40	45
010513	1	64	174	73																	3	1	130	79	6.01	0.84	5.3	2.99	1.18	94	98	39	18	45	60
010514	2	64	165	70	1	0															4	1	152	82	5.12	1.19	4.93	2.91	1.321	89	102	36	18	55	58
010515	2	68	158	63	2		1		4		1										6	3	120	75	10.13	1.58	6.11	3.82	1.75	95	101	37	16	40	38
010516	2	70	162	76	1	1															6	3	150	90	5.95	0.9	7.55	4.86	1.61	92	108	36	17	50	50
010517	1	62	172	60																	3	3	125	75	6.15	2.43	6.72	4.58	1.41	72	88	35	17	40	35
010518	2	67	158	52																	6	3	137	87	5.54	2.45	5.4	3.31	1.18	78	94	33	15	48	35
010519	2	65	162	65	1	1			2												6	3	140	90	6.21	2.2	6.49	4.23	1.08	80	85	35	20	48	50
010520	1	64	170	77	1	1			3												5	2	140	90	5.49	2.53	6.38	4.1	1.4	93	100	42	20	40	45
010521	2	58	162	56																	6	3	110	70	5.15	1.06	6.28	4.22	1.69	78	91	33	17	45	42
010522	1	69	174	69	1	1			2												6	3	137	82	6.34	1.17	7.07	4.58	1.76	89	95	39	21	32	31
010523	2	76	158	65	1	1															6	1	160	80	5.83	1.16	6.45	4.05	1.87	90	101	35	17	30	40
010524	2	74	160	60	1	1			2												4	3	141	90	5.65	0.94	5.04	2.77	1.84	83	100	35	16	40	38
010525	1	80	172	51	1	1			3				4		1						5	3	140	80	8.96	1.56	6.53	4.61	1.21	92	95	39	16	25	30
010526	2	72	158	60																	6	3	135	80	6	2.04	8.28	5.12	2.23	80	96	32	17	30	40
010527	2	64	158	57	2																6	3	130	90	4.29	1.72	6.49	3.63	2.08	77	96	32	17	38	49
010528	2	70	154	70																	6	3	120	80	6.64	1.75	6.86	4.52	1.72	92	105	37	18	40	40
010529	2	61	159	62	1	1			2				3				4		1		6	3	135	80	9.48	2.44	6.91	3.92	1.88	83	97	32	16	34	37
010530	1	52	174	92	1	0			4		0										6	3	140	90	8.2	2.13	6.6	4.32	1.31	103	105	44	19	48	60
010531	2	71	163	65	1	1			4		0										6	3	141	82	7.62	4.34	5.74	3.35	1.59	86	92	35	16	30	40
010532	2	70	162	59	1	0															6	3	145	80	5.11	1.39	5.47	2.92	1.92	73	95	31	17	29	25
010533	2	55	170	85	1	0			2												6	1	150	90	7.24	2.73	5.46	2.43	1.79	105	108	39	17	45	55
010534	2	58	160	60	1	1															6	3	140	80	6.18	1.71	5.91	3.6	1.53	84	95	34	17	50	49
010535	1	59	172	80																	4	3	130	68	6.48	2.54	6.08	3.44	1.49	84	104	38	21	40	46
010536	2	69	160	50																	6	3	120	87	5.58	3.94	5.84	2.44	1.61	73	90	31	15	34	30
010537	2	79	160	45	1	1			2												6	3	150	60	6.19	1.81	5.46	3.36	1.28	71	85	31	15	22	36
010538	2	75	156	49	1	1			2				3								6	3	130	80	5.04	1.8	4.76	2.68	1.26	79	94	29	17	29	30
010539	2	71	159	45																	6	3	144	76	4.83	1	6.05	3.84	1.76	65	91	29	15	25	24
010540	1	64	167	70	1	1															4	1	180	97	6.68	1.62	6.08	3.58	1.76	70	60	38	17	30	40
010541	2	64	162	71	1	1															6	3	131	70	5.72	1.75	5.96	3.5	1.66	91	99	35	17	42	50
010543	2	61	166	65	1	1															6	3	148	80	5.95	3.79	7.5	3.99	1.79	80	94	34	17	50	48
010544	2	60	154	55.5	1	1															6	3	122	92	5.19	2.3	6.68	4.4	1.23	74	60	33	17	48	40
020101	2	42	166	62																	6	1	130	80	5.21	0.67	4.42	2.12	1.58	72	80	34	17	40	32
020102	1	47	173	92.5																	3	1	135	85	5.7	4.66	5.24	1.96	2.14	103	104	38	19	44	36
020103	2	39	158	55																	6	1	89	61	5.06	0.3	2.99	1.44	1.39	70	78	32	16	32	29
020104	1	43	172	70																	6	1	130	75	5.8	3.8	3.87	1.42	0.83	79	84	38	19	40	33
020105	2	59	165	64																	6	1	141	81	5.72	0.64	4.57	2.45	1.26	84	98	35	18	23	20
020106	2	41	154	60																	6	1	132	78	5.5	1.66	4.78	1.44	2.96	75	82	36	18	36	30
020107	1	59	173	68																	6	3	138	75	6.2	1.55	5	2.7	1.25	88	93	42	21	36	31
020108	2	63	160	50																	6	1	107	75	5.8	0.7	4.39	2.24	1.35	79.92	86	38	19	32	26
020110	2	46	163	57																	6	3	120	80	5.6	1.66	4.56	1.21	2.12	80	90	34	17	42	35
020111	2	52	164	62																	6	2	140	86	4.9	1.64	4.66	1.24	2.74	85	94	38	19	36	31
020112	1	39	170	69																	6	1	135	86	6	1.84	5.54	1.42	2.67	80	88	38	19	41	32
020113	2	39	160	50																	6	1	130	74	5.4	1.54	4.21	1.12	2.03	68	72	32	16	32	25
020114	2	39	165	62																	6	1	120	80	6.3	1.62	4.24	1.62	2.11	70	78	32	16	32	24
020115	2	63	165	61																	6	3	120	80	6.12	1.72	4.92	1.61	1.78	82	95	30	17	32	24
020117	2	61	158	58																	6	3	116	72	5.82	1.93	4.51	1.06	1.68	79	91	30	15	39	27
020201	2	56	158	56	1	0			4		0		6								6	3	160	90	6.5	3.2	4.66	3.23	1.48	84	102	30	15	22	20
020202	2	55	159	65	1	0															6	3	140	90	5.3	1.78	5.6	3.13	1.05	86	105	32	15	30	26
020203	2	61	166	70	1	1															6	1	138	88	5.4	1.63	6.3	3.03	0.98	86	110	30	16	28	27
020204	2	58	166	62	1	0			2				4		0		6				6	3	150	90	6.6	2.98	6.45	3.11	1.21	84	98	28	14	32	28
020205	2	61	162	55																	6	3	130	80	5.5	1.91	5.22	3.33	1.52	84	94	31	16	28	29
020206	2	60	161	70	1	1	1		4		1										6	3	130	85	6.3	1.78	5.33	3.56	1.42	86	96	30	16	28	27
020208	2	61	153	59	1	1															6	3	160	100	5.3	1.93	5.83	3.43	1.35	82.5	98	31	16	28	27
020209	2	62	155	51	4		1														6	3	115	75	7	1.71	5.76	3.13	1.05	82	94	33	16	28	29
020210	2	65	159	49	4		1														6	3	135	80	7.2	1.93	6.31	3.42	1.07	82	92	33	16	28	27
020211	2	61	158	65																	6	3	110	80	5.3	0.57	4.78	3.23	1.17	89.1	99	30	14	25	23
020212	2	61	154	65																	6	3	136	86	6.1	1.66	4.72	1.24	2.36	92	97	40	20	36	31
020213	2	61	160	60	2				6												6	3	120	80	5.3	1.93	5.78	3.24	1.23	86	98	28	16	28	27
020214	1	62	175	73	4		1														5	1	130	75	7	1.92	5.83	3.46	1.52	90	95	40	18	28	25
020215	2	62	166	63																	6	1	130	80	5.3	1.78	5.88	3.42	1.62	83	91	34	17	26	27
020216	1	67	165	140																	6	3	135	85	5.46	2.77	6.31	3.62	1.17	86.58	96.57	43.29	17	28	27
020217	2	65	158	50																	6	3	130	80	4.92	1.1	5.25	2.4	2.05	73	90	34	17	32	27
020218	2	60	159	50	2																6	3	140	90	5.4	1.18	6.42	3.72	1.33	82	92	33	16	26	27
020219	2	65	159	58	1	1			4		0										6	3	140	90	6.5	1.68	5.63	3.43	1.37	84	97	31	16	27	28
020220	2	62	168	76	1	0															6	3	130	80	5.8	0.92	5.6	3.13	1.05	86	105	33	16.5	26	25
020222	1	57	180	98																	6	1	150	100	5.6	1.75	5.36	3.21	1.28	98	105	35	20	28	27
020223	2	59	163	45																	6	3	135	75	6.1	1.69	5.44	3.76	1.21	80	70	30	16	28	30
020224	2	57	170	79	1	1															6	3	160	110	5.7	1.61	5.82	3.21	1.42	96	110	32	17	28	27
020301	2	61	170	71																	6	3	120	80	6.4	2.84	6.43	2.32	1.78	85	96	34	17	30	18
020302	1	67	172	70																	6	1	134	76	5.8	1.96	4.52	1.31	1.61	80	90	30	16	25	15
020303	2	59	156	59	2																6	3	120	72	5.6	2.41	6.51	2.63	1.78	90	98	35	18	25	18
020304	1	61	172	70	1	1															6	3	136	82	5.8	2.61	6.35	2.32	1.68	78	90	30	16	22	18
020305	2	59	169	65																	6	3	138	72	5.81	2.32	6.35	1.49	1.87	82	93	31	16	21	16
020306	2	58	162	61																	6	3	122	76	6.12	1.61	4.79	1.63	1.79	78	90	31	15	21	17
020307	2	58	160	57																	6	3	140	90	6.4	2.14	5.47	1.63	1.81	76	87	28	15	19	15
020308	2	56	155	54																	6	3	114	72	6.31	2.12	5.71	1.23	1.61	73	85	35	15	21	15
020309	2	67	160	52																	6	3	120	80	5.6	1.72	4.63	2.12	1.65	75	85	28	14	18	15
020310	2	76	155	48																	6	3	136	78	6.12	1.63	6.15	2.12	1.78	71	79	28	15	22	18
020311	1	76	167	51																	5	1	112	68	6.21	1.72	6.13	1.53	1.81	78	89	24	13	21	18
020312	2	63	172	62																	6	3	116	72	5.91	2.41	6.41	1.93	1.28	90	100	34	18	27	18
020313	2	53	160	60																	6	3	116	74	6.12	3.41	6.38	1.81	1.78	90	105	34	17	30	20
020314	2	66	160	55	1	1	1		4		1										6	3	135	85	6.64	0.93	6.45	4.54	1.86	78	93	29	15	30	18
020316	2	60	156	64	1	1			6												6	3	120	75	6.12	2.41	6.32	1.27	1.81	79	103	31	18	31	21
020317	1	65	168	68	6																6	1	116	72	6.32	2.01	6.42	1.23	1.57	81	103	32	18	34	24
020318	2	64	160	60																	6	3	132	84	6.32	2.12	6.31	1.37	1.91	85	104	33	18	27	21
020319	2	73	155	60	2																6	3	128	76	6.51	1.96	4.76	0.97	1.63	85	104	32	15	27	18
020320	1	63	176	72.5	1	1	1		4		1										3	3	150	90	8	1.91	4.93	2.52	1.21	85	109	32	18	32	24
020321	2	62	155	72.5	1	1															6	3	140	90	5.24	3.22	4.75	2.66	1.12	87	112	35	19	40	27
020322	2	45	155	65																	6	3	120	82	5.89	2.12	6.43	1.79	1.93	81	105	30	16	30	24
020323	2	37	155	67																	6	1	125	80	5.78	5.41	6.68	1.82	3.41	80	96	34	17	32	21
020325	2	56	162	90																	6	3	116	72	6.41	2.43	6.51	1.72	1.91	95	109	32	18	31	26
020326	2	46	163	90																	6	3	112	76	6.71	2.72	7.16	2.71	1.59	106	113	40	22	50	45
020327	1	58	170	60																	6	3	120	78	6.12	1.69	4.52	1.76	1.32	82	92	31	19	32	27
020328	1	54	169	85																	3	3	139	88	6.47	2.76	6.92	1.63	1.57	92	103	36	19	32	25
020401	2	46	160	54																	6	3	100	60	5.3	0.77	5.36	1.54	1.51	66	75	30	15	27	19
020402	2	73	155	45	2																6	3	160	95	6.5	0.92	5.47	2.82	1.5	90	100	36	18	35	19
020403	1	67	168	70	1	1															2	1	133	71	8	1.2	4.36	2.19	1.34	78	89	38	19	41	26
020404	2	67	160	55																	6	3	133	74	4.9	0.61	4.47	1.89	1.55	78	94	32	15	29	16
020405	2	75	156	63																	5	3	130	80	6	1.21	5.28	3	1.11	97	104	33	16	29	17
020406	2	60	159	60																	6	1	100	61	5.53	0.65	3.88	2	1.4	76	95	35	17	30	18
020407	2	73	155	55																	6	3	128	58	4.99	0.74	3.56	1.46	1.61	82	92	25	19	50	35
020408	2	69	150	54																		1	145	80	6.1	0.74	5.42	2.78	1.53	80	99	36	18	35	20
020409	1	53	178	73																	1	1	131	76	5.4	0.75	5.41	2.71	1.54	86	100	38	20	50	20
020410	2	53	162	84	1	0															6	3	121	78	4.91	0.75	5.31	1.81	1.53	93	105	39	21	51	35
020411	2	72	160	70	1	1			2				4		1						6	1	115	68	6.73	0.79	4.06	2.85	1.24	100	110	35	20	47	29
020412	2	73	155	52	1	1															6	3	135	77	7.9	2.15	8.61	4.91	1.34	90	98	35	17	50	40
020413	2	61	158	59																	6	3	111	62	7.2	3.69	4.23	1.76	1.06	79	90	35	19	45	35
020414	1	75	170	70	4		0														6	3	136	78	8.7	0.99	4.71	1.91	1.17	96	106	40	19	58	40
020415	1	55	175	65	1	1			3												2	1	150	90	7.1	0.99	4.71	1.87	1.53	79	91	40	20	45	30
020416	2	56	156	55																	6	3	130	90	4.7	0.99	4.71	1.91	1.17	74	81	35	19	31	27
020417	1	67	171	62.5	1	1															6	3	150	90	5.75	1.01	5.24	2.79	1.74	91	102	40	18	50	40
020418	2	62	158	53	6																6	3	110	70	5.47	0.75	3.79	1.85	1.52	80	91	36	19	45	40
020419	2	55	160	65	1	0			2				3								6	3	112	88	5.1	0.79	3.81	1.74	1.54	82	106	37	19	45	40
020420	2	57	168	120	1	1			2				4		1						6	3	144	86	7.6	0.79	3.51	1.71	1.51	137	138	46	19	29	21
020421	1	74	175	65																	3	1	130	80	5.91	0.82	4.61	2.65	1.49	82	95	38	19	50	40
020501	2	63	155	55	6																2	3	120	80	5.7	0.67	5.21	2.61	1.41	85	96	35	20	45	35
020502	2	47	158	60																	6	3	120	80	5.3	0.68	4.17	2.87	1.39	85	100	33	20	48	35
020503	2	64	162	61																	6	3	135	85	5.76	0.88	4.47	2.38	1.16	90	105	35	19	48	38
020504	1	61	170	70																	6	1	135	80	6.23	0.69	4.53	2.57	1.44	95	110	37	22	50	38
020505	2	59	162	65																	6	1	120	80	4.76	0.88	4.41	2.38	1.16	90	110	32	20	48	39
020506	1	65	176	80																	6	1	135	85	5.5	0.66	5.17	2.85	1.4	115	120	45	28	52	42
020507	1	60	173	67.5	6																6	1	140	85	5.7	0.88	4.47	2.38	1.16	96	105	46	27	50	40
020508	2	60	160	59																	6	1	140	55	6.17	1.67	6.74	3.62	1.63	85	97	37	20	50	40
020509	2	76	155	60																	6	1	140	80	7.11	6.94	4.98	2.93	1.22	90	110	35	20	50	40
020510	1	79	178	67	3																6	3	140	85	6.78	1.91	4.28	2.62	0.85	95	107	38	20	45	39
020511	1	65	170	75	1	1															6	1	140	85	5.6	1.66	3.45	2.46	1.1	95	110	40	25	50	40
020512	2	45	168	58																	6	3	90	60	5.1	0.67	5.17	2.81	1.21	94	94	34	16	50	38
020513	2	47	164	75.25																	6	3	130	100	5.4	1.8	5.15	2.87	1.21	97	102	39	17	45	35
020514	2	46	165	60																	6	3	125	80	5.1	0.68	5.17	2.87	1.35	73.26	88	35	17	40	30
020515	1	57	170	80	1	1	1		4		1										6	1	150	95	6.9	1.85	6.54	2.85	1.4	92.4	110	45	19	50	40
020516	2	42	164	70																	6	1	126	95	6.1	1.23	4.45	2.85	1.5	100	106	38	17	53	41
020517	1	45	173	90	1	0															3	1	145	100	6.1	0.57	6.46	2.87	1.4	100	105	42	19	58	40
020518	1	57	170	60	4		1														6	3	135	85	6.9	0.67	5.15	2.87	1.5	82.5	90	38	17	45	35
020519	2	59	165	70	1	1			4		0										6	3	150	90	6.5	0.87	6.34	2.35	1.5	83	90	37	17	53	45
020520	1	55	173	70																	2	1	125	80	6.1	0.67	5.17	2.17	1.24	96	90	40	19	45	35
020521	2	55	165	60																	6	3	110	70	6.1	0.48	3.65	2.87	1.12	77	80	36	17	55	45
020522	2	62	170	70																	6	1	115	80	4.88	1.48	5.09	2.78	1.5	87	90	37	18	48	35
020523	1	43	178	104	1	1															2	1	150	100	6.1	1.12	3.35	2.87	1.29	107	109	46	20	53	40
020524	2	65	158	58	1	1			3												6	1	155	95	6.1	1.84	5.17	2.81	1.39	83	96	35	20	45	32
020525	1	36	172	73																	2	1	120	80	4.7	2.43	3.42	1.83	0.8	83	95	33	20	40	35
020601	2	51	159	60																	6	3	120	65	5.7	0.67	5.21	2.61	1.41	85	96	35	20	45	35
020602	1	53	173	75																	6	1	135	80	5.5	0.66	5.17	2.85	1.4	115	120	45	28	52	42
020603	1	58	170	70	4		1														6	3	140	90	10	0.66	5.17	2.85	1.4	110	95	35	19	53	43
020604	2	55	160	55																	6	3	140	80	5.8	0.68	5.12	2.51	1.41	90	110	32	20	45	35
020605	2	54	159	56																	6	2	120	75	6.1	0.78	4.13	2.51	1.41	82	95	35	16	46	37
020606	2	45	160	70																	6	3	125	75	6.2	1.24	3.75	1.82	1.32	97	110	33	22	45	35
020607	1	46	170	60																	3	3	123	67	5.75	1.59	5.55	3.32	1.26	107	110	32	19	45	37
020608	1	51	167	61																	2	1	120	80	4.78	1.365	3.21	1.45	1.78	85	94	40	19	45	35
020609	2	52	162	65																	6	3	141	56	5.4	0.88	4.47	2.38	1.16	78	102	34	19	45	35
020610	1	53	178	104																	6	1	135	85	4.78	1.15	3.46	2.76	1.21	125	130	45	26	45	37
020611	2	55	155	55																	6	3	130	90	5.92	9.83	6.96	1.95	2.1	88	98	38	16	45	35
020612	2	59	161	65	1	1															6	1	138	80	6.2	0.88	4.47	2.38	1.16	93	102	38	18	50	40
020613	2	52	165	66																	6	3	130	80	5.71	2.35	7.38	4.05	2.05	90	100	39	18	45	38
020614	2	45	162	58																	6	1	120	78	5.43	0.97	4.37	2.28	1.15	79	99	35	17	48	40
020615	2	51	164	91	1	1			6												6	3	153	92	5.43	1.12	3.87	1.13	0.89	105	120	42	20	49	40
020616	2	64	168	65																	6	3	155	93	6.48	0.93	6.07	3.28	1.94	80	98	36	18	49	37
020617	1	53	172	80	6																1	1	135	85	4.37	0.88	4.57	3.21	1.57	96	100	44	21	48	37
020618	2	71	150	48	1	1			2				4		1						6	3	135	70	5.77	1.48	3.87	2.14	0.96	75	90	32	16	48	35
020619	2	40	155	62	1	1															6	3	125	90	5.3	0.88	4.78	1.78	0.97	85	96	35	20	45	35
020701	2	64	158	66.8	1	1															6	3	162	98	6.19	0.76	4.8	2.33	1.55	84	94	35	16	30	31
020702	2	65	155	56	1	1															6	3	147	77	4.69	0.91	4.44	2.19	1.4	78	90	34	16	30	28
020703	2	61	158	60	1	1			2				3								6	3	149	87	5.56	1.18	5.05	2.44	1.93	82	94	35	15	28	30
020704	2	66	155	55.9	4		1														6	3	149	100	6.2	1.4	5.32	2.78	1.27	82	90	35	15	28	27
020705	2	60	155	78.3	1	1															6	3	156	89	6.44	1.31	5.21	2.9	1.37	84	100	35	16	31	33
020706	2	60	160	66	4		0		5				5								6	3	152	82	10.36	1.75	6.62	4.18	1.41	80	96	35	16	30	28
020707	2	73	160	67	1	0															6	3	150	90	6.8	1.58	4.37	3.36	1.55	79	85	38	15	36	30
020708	2	63	160	60	1	1															6	3	154	87	6.9	2.03	5.58	2.82	1.15	80	95	35	16	28	30
020709	1	63	170	80.2	1	1			4		0										6	3	134	95	6.59	0.84	5.05	3.16	1.2	90	102	38	17	33	32
020710	2	63	158	74	1	1			2												6	3	132	81	6.03	1.4	5.53	2.78	1.64	88	102	35	17	34	33
020711	2	64	154	69.8	1	1															6	3	127	92	6.26	1.53	4.35	2.4	1.17	86	100	36	17	33	34
020712	1	66	170	85	1	1	1		4		1										6	3	140	80	9.56	2.07	5.17	2.96	1.24	90	100	40	18	35	37
020713	2	62	160	68	1	0			3												6	3	147	99	5.07	1.27	5.71	3.37	1.24	86	100	34	17	32	34
020714	2	65	160	63																	6	3	148	77	5.02	2.02	3.97	2	0.94	74	84	33	17	32	33
020715	2	65	161	65																	6	3	130	82	4.99	1.17	8.19	4.78	1.45	84	96	35	17	35	36
020716	2	72	155	58																	6	3	119	72	5.46	0.71	3.61	1.92	1.06	74	85	33	16	31	32
020717	1	77	169	56																	6	3	109	59	4.78	0.35	3.93	1.78	1.43	72	82	31	16	31	32
020718	2	62	157	52	3																6	3	110	70	6	1.35	5	2.32	1.55	72	80	37	16	31	32
020719	1	62	171	70	1	1			4		0										6	3	125	74	6.63	1.11	5.03	2.77	1.04	80	90	33	20	45	31
020720	2	62	158	62.4	2																6	3	139	88	6.09	0.66	4.34	2.36	1.14	82	94	32	17	32	34
020801	2	75	160	65	4		1														6	3	132	90	11.9	1.82	5.97	2.83	1.56	90	115	32	17	36	37
020802	2	79	160	57																	6	3	126	87	5.6	1.37	7.72	4.44	1.67	80	94	30	16	30	30
020803	1	77	168	72	1	1															5	3	146	95	6	1.65	3.96	1.79	1.03	90	108	34	20	40	40
020804	2	61	160	60	1	1	1		4		1										6	3	136	87	6.6	1.76	5.87	3.31	1.11	86	100	32	18	35	36
020805	1	62	170	72																	3	1	136	85	6.3	1.26	5.4	3.3	1.3	85	98	32	18	37	37
020806	2	63	156	60																	6	3	138	86	6.2	1.25	5.5	3.2	1.2	80	92	32	16	35	35
020807	2	62	160	60	1	1			2												6	3	130	86	7.21	1.26	5.6	3.7	1.07	80	92	32	16	35	35
020808	2	71	156	60																	6	3	130	82	6.3	1.27	6.91	3.66	1.58	80	92	33	18	36	36
020809	2	69	156	60																	6	3	123	80	4.4	1.62	5.09	2.6	1.42	80	96	32	17	32	32
020810	1	62	167	70																	6	3	142	90	5.4	0.61	4.51	2.56	1.26	85	96	32	16	32	32
020811	1	65	175	70																	6	3	122	76	5.5	0.81	5.67	3.45	1.25	80	92	32	17	35	35
020812	2	63	160	60	1	1	1		4		1										6	3	140	90	6	1.03	4.6	2.7	1.2	80	92	32	16	32	32
020813	2	62	160	60																	6	3	126	85	5.5	2.16	5.44	2.53	1.12	80	96	32	16	35	35
020814	2	68	160	62	1	1	1		4		1										6	3	146	92	6.8	1.5	8.09	4.73	1.51	80	95	32	16	32	32
020815	2	65	167	73	4		1														6	3	130	90	5.9	1.07	4.66	2.33	1.37	86	97	34	16	33	33
020816	1	62	178	75																	6	3	130	85	5.4	1.03	4.6	2.39	1.21	80	92	32	17	34	34
020817	2	64	158	60	1	1															6	3	130	86	5	2.93	6.43	3.21	1.33	80	92	32	16	32	32
020818	2	74	150	62	1	1			3												6	3	140	92	5.3	0.63	4.83	2.5	1.52	82	94	33	16	34	34
020819	2	66	158	60																	6	3	130	86	6	3.21	1.26	2.31	1.06	82	92	30	16	32	32
020820	2	73	156	60																	6	3	132	86	6.2	1.4	7.05	4.32	1.32	80	92	32	16	32	32
020821	2	60	155	60																	6	3	120	82	4.7	2.62	6.72	3.79	1.38	80	92	32	16	32	32
020822	2	71	158	58																	6	3	167	101	7.12	1.33	5.34	3.04	1.25	86	100	34	18	34	36
020901	1	63	170	58.8																	6	3	120	67	5	0.7	6.09	3.51	1.46	78	96	35	17	32	36
020902	2	62	150	58																	6	3	144	73	5.56	2.17	5.93	2.94	1.16	74	89	34	16	34	37
020903	1	67	178	67.7																	3	1	147	98	6.63	1.34	4.15	2.22	0.96	75	90	34	17	35	37
020904	2	43	158	60																	6	1	110	80	5.8	1.67	5.2	2.21	1.45	78	94	33	16	30	34
020905	2	78	164	60	1	1															6	3	168	92	7.3	1.61	6.24	3.75	1.07	78	95	34	16	32	36
020906	2	64	160	74.7	1	1															6	3	143	92	4.5	1.21	6.12	3.43	1.59	76	92	34	18	34	32
020907	2	80	160	65	1	1															6	3	166	102	6.1	2.41	7.34	4.18	1.17	75	88	34	17	34	36
020908	1	62	153	60																	6	3	114	72	5.9	2.31	6.04	3.34	1.01	77	90	34	17	34	35
020909	1	69	170	65	1	1															6	3	164	104	6.33	2.55	6.24	3.52	1.13	84	100	36	18	36	38
020910	1	74	165	80	2																6	3	125	77	8.23	1.03	5.86	3.58	1.24	86	100	35	18	34	37
020911	2	63	160	60																	6	3	141	89	6.42	2.03	5.56	2.85	1.07	85	100	34	18	34	38
020912	1	64	170	70	2																6	3	154	87	6.08	0.94	5.95	3.56	1.46	79	92	35	18	34	36
020913	1	65	176	70.8	2																6	3	135	80	5.2	1.48	6.09	3.42	1.06	78	89	34	17	34	33
020914	2	66	160	41																	6	3	163	85	6.23	1.1	4.4	2.1	1.46	70	85	34	18	34	36
020915	2	67	160	68	2																6	3	150	94	6.96	1.69	6.72	3.76	1.55	80	98	34	16	32	38
020916	2	73	164	67.5	4		1														6	3	189	102	8.84	1.79	4.59	2.22	1.33	82	95	34	17	32	36
020917	2	79	162	60.5	1	1															6	3	179	109	6.86	0.82	6.59	3.16	2.09	78	90	34	18	32	36
020918	1	80	185	83																	6	3	149	98	6	0.51	5.18	2.55	1.79	78	92	34	18	34	38
020919	2	65	160	62.5	1	1			2												6	3	114	66	5	0.98	5.23	3.01	1.2	79	92	34	16	30	36
020920	2	60	162	58																	6	3	130	75	6.2	1.74	4.83	2.21	1.36	80	101	32	18	32	36
021001	1	62	172	72																	2	1	140	80	4.82	2.06	4.28	2.85	0.87	85	99	42	20	34	22
021002	2	63	160	60																	6	3	130	80	4.9	1.64	4.12	2.87	1.62	80	96	39	20	31	26
021003	2	60	166	68	6																6	3	110	60	5.8	1.74	4.76	3.12	1.12	79	96	39	21	34	24
021004	2	65	173	71	1	1															6	3	140	90	5.78	1.78	4.78	2.46	1.21	79	95	39	20	28	24
021005	2	62	156	50																	6	3	130	85	4.62	2.28	4.21	1.93	1.06	72	89	36	18	28	18
021006	2	52	157	68																	6	3	130	90	5.17	1.78	3.69	2.87	1.2	82	105	39	18	30	38
021007	2	52	170	75																	6	3	126	78	5.4	0.64	5.85	4.15	1.76	82	100	40	20	37	20
021008	2	65	164	70																	6	3	135	85	5.75	0.99	4.95	2.95	1.87	85.5	98	41	19	29	21
021009	2	67	160	65																	6	3	130	80	4.85	2.8	4.85	3.86	0.89	82	102	40	19	34	22
021010	2	68	164	75	2																6	3	160	100	5.48	3.26	5.86	2.37	0.78	89	108	43	21.5	36	24
021011	2	51	162	58																	6	1	130	90	5.6	1.26	5.13	2.87	1.09	73	86	36.5	18	31	32
021012	2	68	168	75	1	1															6	3	150	95	5.82	1.64	5.01	2.84	1.41	89	110	44	21	31	24
021013	1	69	172	70	1	1			2				4		1						4	2	145	90	8.5	0.96	3.85	1.72	1.33	89	105	43	22	29	21
021014	1	48	172	65	1	1															6	1	150	90	5.4	1.78	4.68	2.47	1.21	86	97	43	21	38	30
021015	2	56	156	52																	6	3	130	80	5.72	1.73	4.82	2.87	1.05	73	92	36	17	24	22
021016	1	52	172	75	1	0	1		4		1										2	1	150	90	8.4	1.99	4.87	2.19	0.84	89	99	46	22	34	26
021017	2	68	157	66																	6	3	120	80	7.4	1.07	6.17	3.6	1.58	89	93	43	20	24	21
021018	2	60	167	60	1	1															6	3	130	90	4.3	1.68	5.95	4.82	0.94	79	99	39	20	30	18
021019	2	71	155	59	1	1			4		0										6	3	120	80	7.1	1.68	5.95	3.89	0.98	82.5	92	40	21	30	18
021020	1	63	170	70																	6	2	120	80	4.8	0.93	5.26	3.17	1.36	95	99	45	24	32	22
021021	2	63	156	60																	6	3	110	70	5.2	0.93	5.66	3.37	1.52	82.5	99	41	21	28	20
021101	2	56	156	58																	6	3	120	80	5.76	1.84	5.76	2.78	1.02	79	96	39	18	31	21
021102	2	56	156	50																	6	3	110	70	4.9	1.91	6.82	3.12	0.87	68	80	33	16	30	20
021103	2	57	162	56	1	1															6	3	140	85	5.7	0.58	4.89	2.87	1.17	75	95	37	19	19	22
021104	2	56	164	60	3																6	3	120	70	4.5	1.83	4.78	3.18	1.14	74	96	36	17	31	20
021105	2	60	150	51																	6	3	140	70	6.2	1.6	3.67	3.18	1.41	89	92	31	58	19	21
021106	2	63	156	55																	5	3	120	80	6.2	1.5	3.94	2.89	1.4	95	90	36	55	30	25
021107	2	62	160	60	1	1			3												3	3	140	80	6.59	0.98	4.92	2.65	1.43	89	92	35	59	25	30
021108	2	51	169	73	2																5		120	80	4.6	1.69	4.52	2.86	1.52	80	103	39	17	32	21
021109	2	58	160	96																	6	3	110	70	5.6	1.63	3.79	2.94	1.37	80	85	30	52	20	20
021110	1	63	173	92	1	0			2				4		1						4	3	130	80	60	1.7	3.82	2.96	1.41	97	95	40	60	36	30
021111	2	52	160	60																	3		110	70	5.87	1.74	4.99	3.52	1.45	92	110	38	20	35	22
021112	2	56	170	80																	3	1	130	85	6.3	1.62	4.93	2.65	1.37	82	110	40	20	35	22
021113	2	47	150	46																	3	3	100	70	5.97	1.72	5.3	2.84	1.43	80	89	32	56	30	25
021114	2	61	164	110	1	1															3	3	140	85	6.3	1.65	5.31	2.83	1.37	91	108	37	54	31	28
021115	2	57	170	66																	3	3	130	80	5.82	1.49	4.73	3.1	1.48	88	95	38	50	32	28
021116	2	52	160	71	5																3	3	135	80	5.3	1.58	4.35	3.41	1.53	85	102	36	19	31	28
021117	2	58	157	55																	3	2	120	70	5.7	1.7	4.86	2.64	1.51	89	105	38	55	25	27
021118	2	71	158	71	1	1			2												3	3	110	65	6.1	1.75	4.25	3.1	1.3	82	101	35	21	28	26
021119	1	46	178	101																	3	1	130	85	5.78	3.47	6.23	3.76	0.89	100	110	48	25	41	32
021120	2	53	158	59	3																6	3	120	75	5.14	2.89	5.98	2.78	1.02	81	98	39	21	28	21
021201	2	76	167	71	1	0			3				4		1						6	3	185	78	10.06	0.86	4.33	0.04	1.61	100	97	35	15	25	40
021202	2	67	160	50																	6	3	106	68	5.7	0.67	4.37	2.23	1.4	74	93	32	15	20	12
021203	1	61	172	70	1	1															6	1	131	87	5.1	2.48	4.01	2.04	0.93	93	99	39	20	49	30
021204	2	60	168	57																	6	3	129	81	6	2.01	4.01	3.81	1.51	82	88	33	16	43	30
021205	1	62	168	85	1	0			3				4		0						3	3	140	85	5.38	1.95	4.28	2.49	0.97	99	111	41	20	31	30
021206	2	55	160	68	1	1															6	3	118	72	6.4	1.37	4.86	3.93	1.75	93	98	36	7	50	30
021207	1	58	170	85																	3	1	145	90	5.3	1.25	4.86	3.48	1.35	103	97	43	18	34	30
021208	1	66	172	75																	5	1	145	90	10.51	1.26	4.94	2.89	1.33	82	93	36	17	26	26
021209	2	62	164	60																	6	3	137	68	5.93	1.9	6.5	4.11	1.28	81	89	30	14	34	24
021210	2	64	156	56	1	1															6	3	132	79	5.42	1.4	6.12	3.71	1.23	75	90	32	15	31	20
021211	1	74	164	67	2																4	1	100	80	5.5	1.76	5.41	3.08	1.58	82	96	35	17	32	22
021213	1	65	174	75	1	1	1		4		1										5	1	134	87	6.5	2.09	4.96	2.49	0.95	89	98	39	18	26	20
021216	2	63	156	70	1	1			4		0										6	3	140	80	5.44	2.31	4.94	2.46	1.01	90	100	36	18	48	36
021218	1	64	168	60	1	1															4	1	130	74	5.42	0.56	5.44	2.91	1.96	80	85	36	16	50	40
021220	2	71	165	60	1	1															6	3	149	87	4.64	1.2	6.16	3.21	1.71	90	95	32	15	40	35
021301	2	63	160	55	1	1															6	3	121	65	4.92	0.99	6.08	3.59	1.3	84	93	32	15	49	40
021302	1	61	175	69	2																6	1	139	95	4.93	4.79	4.4	0.95	1.06	82	92	35	16	35	16
021303	1	67	164	73	1	1			2				3								5	3	119	64	8.16	2.05	5.45	3.03	1.1	93	99	38	17	34	38
021304	2	65	157	90	1	1															6	1	140	95	4.33	1.49	5.74	3.27	1.54	106	115	38	17	44	50
021305	1	61	172	78	1	1															5	1	130	86	4.78	0.98	6.01	2.56	1.54	80	97	38	17	39	25
021306	2	70	155	65	2																6	3	134	75	4.67	1.12	5.98	2.46	1.61	83	91	31	15	50	45
021307	2	61	154	55																	6	3	120	70	4.68	1.26	6.01	3.46	1.76	75	95	30	15	32	20
021308	2	79	150	50	1	1			2				4		0						6	3	134	65	4.86	0.86	6.01	3.26	1.48	89	88	30	15	32	15
021309	1	80	179	82	4		1														4	1	140	79	6.86	1.15	4.57	3.09	0.79	102	102	37	7	35	25
021310	2	62	156	41	4		1														6	3	132	82	7.7	1.26	5.96	3.27	1.26	80	70	35	6	40	20
021311	2	68	157	56	1	1			2												3	3	130	80	5.09	1.52	5.38	2.4	1.62	76	92	32	16	36	30
021312	1	73	170	84	1	1															6	1	119	79	5.09	0.66	4.81	2.28	1.47	101	106	39	18	55	44
021313	2	63	158	61																	6	3	140	90	5.2	0.58	4.98	2.59	1.67	84	96	32	17	40	35
021314	2	66	158	51	1	1															3	3	134	69	7.4	2.9	4.67	2.13	1.06	87	90	33	16	32	32
021315	2	68	160	70	2																6	3	116	66	5.9	2.88	5.06	2.25	1.18	95	103	36	15.5	36	26
021317	2	65	150	68	1	0	1		4		1										6	3	115	65	5.3	1.99	5.03	2.5	1.08
021318	2	67	156	62																	6	1	121	67	57	1.24	4.44	2.2	1.25	83	98	32	16	40	30
021319	2	63	158	60	4		1														6	3	149	79	7.8	2.31	4.98	2.3	0.97	83	98	23	15	28	34
021401	2	62	160	77	1	1															6	3	132	74	5.6	1.71	5.32	2.45	1.21	100	102	34	17	40	22
021402	1	76	173	76	3																6	3	135	81	4.9	2.23	3.89	2.34	0.75	96	103	17	16	60	50
021403	1	60	167	60																	6	1	138	74	4.73	0.9	6.1	2.3	1.47	81	109	35	16	20	15
021404	1	62	170	70																	6	3	136	90	7.22	0.62	5.02	2.54	1.85	99	101	35	18	23	20
021405	2	79	168	56.5																	6	3	147	75	5.54	1.78	5.52	3.39	1	99	95	32	15	23	21
021406	2	55	152	53.5	1	1															6	3	137	91	5.2	3.65	4.36	2.47	0.68	78	90	30	14	30	26
021407	1	62	172	62	1	1															6	1	144	82	6.52	1.85	3.71	0.29	0.84	95	104	41	18	50	25
021408	1	61	162	50	3																3	3	120	80	5.06	2.51	6.45	0.3	1	87	95	39	16	30	27
021409	1	62	168	70	1	1															3	1	130	80	5	2.84	4.63	2.32	0.7	88	92	37	18	30	30
021410	2	61	160	66.5																	6	1	112	73	4.87	3.65	4.89	2.04	1.05	87	99	39	16	30	27
021411	2	65	155	70	1	1															4	3	135	78	6.26	1.73	6.34	3.61	1.22	75	90	32	15	31	20
021412	2	63	162	60	1	1	1		4		1										6	3	130	67	11.04	3.72	5.52	2.8	0.89	80	94	35	16	45	40
021414	2	62	165	69																	6	3	123	60	5.7	2.03	4.71	2.27	1.19	86	98	34	16	32	28
021415	2	63	155	60	4		1														6	3	134	78	9.4	4.66	7.6	3.31	1.1	88	99	35	16	38	30
021416	1	65	167	75																	4	1	153	87	5.6	1.08	7.16	4.4	1.28	89	102	42	17	48	46
021418	2	59	160	60																	6	3	134	73	5.23	3.21	5.3	1.21	1.3	82	94	33	15	30	24
021419	2	62	158	50	1	0															6	3	126	78	5.7	3.24	4.89	2.31	0.61	74	89	31	15	24	14
021420	1	66	173	105																	6	1	120	70	5.5	3.12	4.32	2.74	0.71	118	120	43	18	32	18
021421	2	55	157	72.5	1	1	1		4		1										6	3	128	68	10.08	2.63	5.07	2.97	1.11	100	110	17	15	40	35
021422	2	70	164	82	3		1		4		1										6	3	138	78	12.51	2.05	0.28	3.24	1.44	100	108	18	36	30	28
021423	1	71	170	60	1	1															6	3	117	68	4.58	0.86	5.94	3.39	1.3	73	94	35	16	24	16
021501	2	61	165	62																	6	3	110	70	5.7	2.25	5.23	3.26	1.2	80	88	39	22	15	14
021502	2	71	163	62																	6	3	140	80	5.2	0.83	4.47	2.39	1.28	76	90	38	21	15	15
021503	1	64	165	79	1	0			4		0										6	1	120	80	5.8	1.26	5.25	1.38	1.1	90	97	42	22	18	17
021504	1	62	175	80																	4	1	150	75	4.59	2.06	5.32	3.36	1.6	95	105	42	23	18	20
021505	1	64	170	65																	6	3	145	80	5.5	2.08	5.6	3.5	1.5	83	92	39	20	14	17
021506	2	62	170	77																	6	3	130	80	5.9	2.06	5.2	3.6	1.3	103	112	42	28	20	23
021507	1	66	167	70																	6	3	135	80	5.6	3.2	5.5	2.35	1.2	110	120	45	25	20	12
021508	2	62	158	60																	6	3	145	80	6.2	3	4.3	3.5	1.5	84	95	39	22	13	15
021509	1	71	175	73	1	1			3				4		1						6	3								87	95	42	22	15	18
021510	2	69	155	69																	6	3	130	80	5.7	2.89	3.65	2.89	1.3	89	100	40	23	15	17
021511	2	75	156	62	1	1			3												6	3	140	80	5.6	3	3.6	3.8	1.3	75	84	38	20	14	18
021512	1	76	172	75																	6	3	135	76	6.3	3.25	4.6	6.5	1.5	85	95	40	22	13	15
021513	2	64	165	64	1	0															6	3	125	80	7.8	3.6	5.3	5.3	1.6	83	90	41	21	13	17
021514	1	64	170	70																	6	3	130	70	4.6	2.6	5.5	3.6	1.5	85	93	42	22	15	18
021515	2	64	154	60																	6	3	135	85	6	1.59	4.26	2.23	1.28	80	95	40	22	15	19
021516	1	73	166	52																	6	3	135	80	5.6	3.6	5.6	3.6	1.3	76	92	335	16	11	10
021517	2	71	156	61	1	0															6	3	120	70	6.3	2.5	6.3	5.2	1.6	86	95	40	20	15	14
021518	2	44	163	52																	6	1	110	70	4.6	0.96	4.25	1.65	1.22	75	82	38	19	13	12
021601	2	52	155	50	4		1														6	3	120	80	5.7	1.54	5.45	2.32	1.3	76	85	30	14	18	19
021602	2	50	156	60																	6	3	130	80	5.2	1.32	4.65	3.32	1.16	86	95	34	20	19	20
021603	1	66	169	78	1	1															6	1	136	82	4.9	1.32	5.28	3.34	1.08	85	95	35	25	20	21
021604	2	76	157	59	6																6	3	130	80	5	1.56	5.25	2.36	1.1	80	90	32	21	15	16
021605	1	53	176	70																	6	3	130	80	4.5	0.89	5.65	2.43	1.5	80	90	32	23	20	19
021606	2	50	159	60	1	0															6	3	140	80	6.1	1.47	5.33	2.42	1.2	82	92	34	24	20	19
021607	1	67	174	60	2																6	3	140	80	5.9	1.62	5.35	3.22	1.15	80	90	32	19	18	16
021608	2	62	152	60	2																6	3	140	80	5.3	1.23	4.56	2.33	1.36	80	90	32	19	19	18
021609	1	65	182	85																	6	3	140	80	5.8	1.35	5.28	2.26	1.1	80	90	32	19	19	18
021610	2	65	160	60																	6	3	124	76	5.2	1.22	3.36	0.36	0.99	78	88	32	18	17	16
021611	2	35	158	60																	6	3	130	90	5.4	1.03	4.69	2.11	1.11	82	92	34	20	19	18
021612	2	63	162	68																	6	3	130	82	4.9	1.56	5.67	0.46	1.06	80	90	32	18	18	17
021613	2	63	162	63																	6	3	136	80	6.2	1.04	3.59	1.11	1.19	80	90	32	16	15	16
021614	2	78	153	62																	6	3	150	80	3.9	0.89	5.36	0.75	1.25	78	88	32	18	17	18
021615	2	63	162	58																	6	3	140	80	4.6	1.96	6.13	3.66	1.53	82	92	32	19	19	18
021616	1	66	172	75																	3	3	130	80	4.8	1.21	5.14	1	1.46	82	92	34	20	19	18
021617	2	64	162	53																	6	3	140	80	5.7	1.1	3.49	0.45	1.59	78	88	31	18	18	17
021618	2	61	165	70																	6	3	140	80	5.3	1.59	4.53	0.36	1.34	80	90	32	19	18	17
021619	1	68	175	63	4		0														6	3	140	80	5.6	1.24	3.48	0.75	1.13	80	90	32	20	19	18
021620	2	66	160	52																	6	3	150	80	5.9	1.39	4.66	1.25	1.27	80	90	32	19	18	17
021701	2	65	160	55.4	4		1														6	3	124	70	5.4	1.58	5.77	1.49	1.6	84	94	38	22	21	20
021702	1	66	174	76.6	4		1														6	3	130	80	4.8	0.99	3.85	0.58	1.25	80	96	38	20	19	18
021703	2	77	154	51	3																6	3	128	80	5.1	1.48	4.67	3.12	1.19	86	94	38	19	18	17
021704	2	60	155	56																	6	3	130	80	5.7	1.27	4.52	3.04	1.37	80	90	38	18	17	16
021705	1	61	165	73	1	1			3												6	1	140	80	6	1.49	4.81	2.65	1.49	88	96	38	20	18	17
021706	1	76	165	49																	6	1	130	80	5.8	1.37	3.74	3.08	1.18	80	90	38	20	19	18
021707	2	69	162	56.4																	6	1	136	84	4.9	0.85	3.69	0.44	1.16	84	94	38	20	19	18
021708	2	64	162	55	1	1															6	3	136	84	5.9	1.36	3.58	0.33	1.27	84	96	40	25	24	23
021709	1	64	170	60	1	1															1	3	130	86	5.7	1.24	5.16	0.49	1.16	84	93	34	21	20	19
021710	1	48	170	70	3																2	1	140	80	5.2	1.24	3.14	2.1	1.21	90	95	38	25	24	23
021711	2	64	160	81	1	1	1		4		1										6	3	132	84	5.6	1.29	5.49	0.78	1.18	86	94	40	24	23	22
021713	2	74	165	39.8																	2	1	130	82	5.5	1.08	5.38	0.76	1.17	86	94	42	23	22	21
021714	1	78	166	60	1	1															2	3	136	84	5.2	0.88	6.03	1.23	1.23	84	94	38	19	18	17
021715	1	64	160	62	4		1														1	1	140	80	5.3	1.33	4.72	2.37	1.06	84	92	40	24	23	22
021716	2	71	156	57																	1	3	138	86	5.8	1.27	4.82	1.28	1.07	80	94	38	24	23	22
021717	1	76	175	68	1	1															1	3	138	86	6.1	1.37	5.49	0.87	1.15	80	94	38	26	25	24
021718	1	73	165	63																	1	3	132	80						86	94	37	20	19	18
021719	1	67	165	64																	2	3	136	84	5.7	1.46	4.33	2.22	1.16	82	94	40	26	25	24
021720	2	65	160	53																	2	3	140	80	5.9	1.43	4.26	1.16	1.17	80	92	35	20	19	18
021721	1	67	182	78	1	1															3	3	120	80	5.6	0.76	5.49	1.18	1.19	80	90	38	26	25	24
021801	2	53	158	67.5																	6	1	140	90	5.7	4.3	7.9	5.1	1.1	80	110	34	17	32	29
021802	1	58	178	80																	3	1	135	85	5.6	2.5	6.1	4.2	1.01	90	120	35	19	36	34
021803	2	36	160	56																	6	1	100	80	5.4	1.6	4.91	2.01	0.2	75.9	90	35	17	28	26
021804	1	44	170	72																	3	1	125	80	5.6	1.5	5.65	3.02	1.4	82.5	95	34	17.2	30.2	28.1
021805	2	37	160	58.5																	3	1	120	70	5.2	1.9	4.6	2.4	1.3	68	80	32	15	28	21
021806	2	34	161	68																	6	1	115	75	5.3	1.6	4.89	2.45	1.6	82.5	100	34	18	35.1	27.8
021807	2	46	157	55																	6	3	120	70	4.9	1.5	4.9	2.56	1.3	68	82	31	16.5	26.1	22
021808	2	52	163	61.5																	6	3	110	80	4.98	1.6	5.12	2.32	1.2	72.6	88	33.5	17	28.9	23.1
021809	2	49	157	58	1	1															6	3	135	95	6	1.8	4.94	2.78	1.2	75.9	90	33.8	17	28.5	22.3
021810	2	49	168	85	1	1															6	1	145	90	5.7	1.7	6.9	3.01	1.2	85.8	110	35.2	17.5	34.1	28.4
021811	2	58	155	46																	4	1	110	65	5.3	1.4	4.56	2.01	1.5	66	83	31	16.5	22.1	20.4
021812	2	42	162	64																	6	1	110	75	5.1	1.6	4.65	2.31	1.3	79.2	108	35.6	18.1	34.9	29.9
021813	1	56	185	90	1	0	1		4		1										4	1	180	120	5.7	2.13	6.89	4.1	1.3	85.8	103	34.8	18.9	32.3	30.1
021814	2	47	156	52.5																	6	3	110	70	5.6	2.8	6.9	3.98	1.2	72.6	80	31	15.2	23	21.5
021815	2	37	174	59																	6	1	120	80	5.7	1.6	4.28	1.96	1.5	75.9	95	35.1	16.8	31.2	27.8
021816	2	57	160	45	2																6	1	100	70	5.3	1.3	4.9	2.1	1.45	66	83	31	15.6	25.6	22.2
021817	2	32	159	66	4		1														6	3	125	80	6.6	1.6	5.42	2.01	1.6	90	103	34.5	17.5	31.6	27.8
021818	1	55	170	73	1	1															6	1	100	80	5.9	5.5	6.36	2.87	1.4	82.5	94	32.8	18.1	29.9	26.4
021819	2	54	158	50																	6	1	100	60	6	2.8	6.96	2.68	1.3	66	82	31.2	16.4	25.1	21.4
021820	2	47	160	65																	6	1	130	78	5.4	2.5	5.52	4.06	1.07	79.2	95	34	15	38	28
021821a	1	49	166	66																	6	1	128	80	5.7	1.6	5.36	2.13	1.1	79.2	90	34.2	17.2	28.9	24.1
021821b	1	53	172	70																	6	3	140	90	5.5	2.2	4.56	2.89	1.2	82.5	100	35	19	40	30
021822a	2	47	168	70																	6	3	120	80	5.5	4.2	7.8	5.3	1.2	85.8	110	35	18	38	29.3
021822b	2	53	164	70	1	0															6	3	138	90	5.8	1.52	5.62	2.46	1.5	75.9	92	34.1	17.2	30.9	26.1
021823	2	35	160	55																	6	3	90	60	5.9	1.6	6.35	2.1	1.3	62.7	81	32	16	24.2	21.1
021824	1	52	169	60																	6	1	135	82	5.7	2.45	7.89	4.05	1.1	82.5	92	34.2	17.1	28.9	24.2
021825	1	44	165	75																	6	1	130	80	5.4	2.1	7.34	4.2	1.9	82	95	38	19	36	30
021826	2	40	161	72																	6	1	105	70	4.5	1.6	5.98	3.56	1.4	78	105	35	17	34	30
021827	2	39	156	60																	6	1	140	80	5.9	1.5	6.5	2.67	1.3	72.6	88	33	17	31.2	27.8
021828	2	55	150	72																	6	3	135	80	6.4	2.23	6.78	2.96	1.5	85.8	100	36	17.2	33.5	29.5
021829	1	56	178	85	1	0			3												6	1	130	80	6.1	1.7	6.96	3.01	1.2	85.8	109	37	19.2	33.6	32.1
021901	1	64	172	72.5																	4	1	130	80	4.61	1.65	4.43	2.55	0.81	80	100	36	16	31	28
021902	2	64	151	64	1	1															6	3	140	90	4.18	4.77	6.34	2.51	1	80	69	35	14	32	28
021903	1	57	189	90																	3	1	145	80	5.63	3.21	5.63	2.25	1.36	97	110	36	18	28	26
021904	2	55	167	65																	6	3	120	80	5.1	1.27	5.02	2.56	1.56	72	100	32	15	27	24
021905	1	65	175	75																	6	3	130	85	5.27	1.53	4.67	2.58	1.16	100	108	36	15	30	26
021906	2	64	160	65																	6	3	120	80	4.73	1.45	5.44	3.25	1.27	80	96	33	15	26	25
021907	2	64	162	67	1	1															6	3	130	90	5.8	1.86	5.43	2.95	1.22	85	104	35	15	32	26
021908	2	68	164	65																	6	3	120	80	5.6	1.05	6.78	4.09	1.75	88	104	33	15	31	27
021909	1	67	178	72.5																	4	1	135	85	7.9	1.1	6.97	4.25	1.84	85	96	38	16.5	28	25
021910	2	50	160	60	1	0															6	3	130	80	4.6	1.95	5.37	1.78	1	72	95	33	15	26	24
021912	2	55	160	47																	6	3	85	55	3.8	1.12	4.86	2.05	1.12	66	85	34	14	24	21
021913	1	55	185	80	1	1															6	1	140	90	5.89	1.17	5.56	3.05	1.12	84	96	36	17	26	24
021914	2	46	155	52																	6	3	109	64	4.92	1.69	5.54	4.15	1.04	70	92	32	15	25	22
021915	1	51	174	62																	6	3	102	67	5.19	0.66	5.01	3.42	1.51	80	98	34	16	26	24
021916	2	63	158	58	1	1															6	3	140	90	5.63	1.98	5.64	2.87	0.92	80	98	32	15	26	23
021917	2	65	164	85																	6	3	150	73	6.1	3.1	6.11	3.87	1.56	98	110	34	17	36	24
021918	1	36	170	70																	6	3	120	80	5.4	1.87	5.02	3.12	1.16	82	96	33	15	26	24
022001	2	60	163	70																	4	3	135	75	6.2	1.03	5.03	1.65	1.56	82.5	100	37	20	32	25
022002	2	66	164	64	4		0														4	3	125	70	7.5	2.1	4.32	1.65	1.5	70	102	35	19	30	24
022003	2	61	167	74	1	1															4	3	125	75	5	2.43	5	1.6	1.5	85.8	100	26	19	31	24
022004	2	65	162	65	1	1																3	148	80	5	2.2	3.45	1.6	1.5	82.5	105	25	18	30	24
022005	2	68	159	60	1	1																3	130	70	5	2.4	5.6	1.5	1.6	82.5	105	26	19	31	25
022006	2	56	162	65																	6	3	135	75	5.6	2.4	5.1	1.5	1.6	79.2	100	26	18	31	25
022007	2	60	165	80																	6	3	125	75	6.5	2.1	5.6	1.6	1.5	82.5	100	35	17	32	26
022008	2	61	155	50																		3	125	75	5.6	2.4	5.6	1.5	1.6	72.6	100	35	18	30	25
022009	2	55	175	75																	6	3	125	75	5.6	2.1	5.6	1.6	1.5	82.5	120	35	20	35	22
022011	2	69	160	60																	4	3	130	70	5.6	2.03	3.4	1.5	1.6	75.9	100	30	18	32	25
022012	1	70	170	75																		3	125	75	5.6	2.2	5.4	1.5	1.6	75.9	100	30	18	32	25
022014	2	61	162	62																	4	3	128	80	5	3.1	6.02	1.5	1.6	77.55	100	35	15	30	25
022101	2	55	164	62																	6	3	130	78	5.61	1.56	4.7	2.68	1.04	75.9	80	35	6	28	25
022102	2	57	159	47																	6	3	110	70	5.6	1.8	5.46	2.06	1.7	70	88	31.5	16.5	22.2	20.5
022104	2	57	165	63	1	1															6	3	118	75	5.8	1.55	5.86	3.21	1.08	82.5	94	35	6	29	26
022105	2	48	170	62																	6	3	90	50	5.62	1.28	5.94	3.46	1.08	77	97	36	7	30	26
022106	1	62	183	85	1	1			2												6	1	147	96	4.56	1.15	5.95	3.48	1.06	92.4	99	40	19	30	26
022107	2	65	160	50																	6	3	128	78	5.4	1.61	3.51	1.82	1.19	72.6	85	35	16	31	24
022109	2	64	168	75																	6	3	119	66	5.21	1.28	5.94	2.84	1.22	74	96	36	17	34	26
022110	1	65	175	50	2																3	1	107	58	4.21	1.84	6.49	3.84	1.09	66	88	38	17	27	26
022111	2	56	160	47																	6	3	93	54	5.21	1.62	5.22	3.13	1.28	66	82	35	6	27	24
022112	2	57	150	50																	6	3	140	80	5.8	1.26	5.86	3.26	1.04	70	90	32	15	29	27
022113	1	63	172	90	1	1															6	2	140	87	5.84	1.24	5.65	3.47	1.04	100	94	38	17	29	27
022114	2	56	160	70																	6	3	131	84	5.2	1.12	3.51	1.82	1.19	74	95	36	16	29	27
022115	2	57	162	51																	6	3	126	84	4.99	1.28	4.86	3.49	1.21	84	90	38	6	30	24
022116	2	58	156	62	1	1															6	3	120	68	5.5	1.78	5.43	3.01	1.12	76	96	33	15	24	25
022201	1	61	176	70																	2	1	130	80	5.66	1.23	5.96	3.3	1.86	71	90	39	16	28	24
022202	2	67	160	52	1	1															6	3	157	86	4	3.28	4.16	1.8	0.86	69	86	32	11	27	36
022203	2	60	160	51																	6	3	117	70	6.2	1.46	5.96	3.46	1.25	68	88	35	7	34	28
022204	2	65	170	60	1	1															6	3	140	75	5.4	1.25	3.45	2.4	1.2	70	92	36	11	27	33
022205	2	66	158	56	4		1														6	3	145	78	6.09	3.33	4.71	1.61	1.09	70	85	34	6	26	35
022206	1	77	173	75	1	1															6	3	132	80	4.92	1.06	4.82	2.54	1.06	72	98	37	18	29	27
022208	1	71	173	75																	2	1	117	72	5.55	1.72	5.86	3.26	1.38	70	88	39	17	24	26
022209	2	49	159	60																	6	3	136	86	5.7	1.62	5.15	3.15	1.36	68	85	33	10	28	35
022210	1	63	174	84	1	1			2												6	3	150	90	5.1	1.27	5	3.22	1.1	75	88	39	12	28	26
022211	2	62	157	57.5	2																6	3	130	75	6.3	3	4.29	3.2	1.2	69	84	36	8	29	35
022212	2	54	155	51																	6	3	120	80	5.6	1.27	5.1	3.15	1.67	67	81	34	6	27	35
022213	2	54	170	65																	6	3	110	70	5.8	1.38	5.1	3.15	1.2	70	86	39	13	27	34
022214	2	55	162	57	4		1														6	3	120	75	10	1.38	4.79	2.62	0.98	70	87	33	7	27	34
022215	2	59	157	65	1	1															6	3	120	70	5.8	1.3	5.2	3.15	5.2	71	84	35	6	29	35
022216	2	60	156	65	1	1			2												6	1	129	71	5.89	2.43	7.67	4.99	1.26	71	84	33	6	28	33
022217	2	69	167	70																	6	3	148	85	6.44	1.44	5.55	3.49	1.11	75	90	32	12	26	33
022218	1	68	173	70																	4	1	116	79	5.3	1.43	4.67	4	1.26	85	88	39	12	29	26
022219	2	63	157	70																	6	3	146	82	5.2	2	2.1	3.2	1.25	72	84	35	12	26	33
022220	1	67	168	65																	6	1	144	95	4.85	1.87	6.08	3.1	1.29	72	85	39	12	29	27
022221	2	58	158	60	1	1			2												6	3	156	93	4	2	5.6	2.4	1.3	71	85	33	12	27	33
022222	2	55	165	68	1	1	1		4		1										6	3	140	82	8	2.4	4	4.1	1.2	69	89	33	10	27	33
022223	1	65	168	71																	6	3	129	80	4.15	1.82	4.92	1.9	0.96	72	85	39	12	25	26
022224	2	59	150	62.7	1	1															6	3	140	90	6.1	2.3	1.56	4.95	1.26	71	85	34	10	27	34
022225	1	60	165	60																	6	3	130	80	6.2	1.98	1.38	4.25	1.26	72	85	39	12	24	25
030101	2	64	156	68	1	1	1		4		1										6	3	160	89	6.17	1.52	4.32	1.94	1.48	90	103	38	18	50	20
030102	2	67	152	65	1	0			2												6	3	126	64	3.95	1.46	5.97	2.95	1.71	91	108	37	16.5	60	20
030103	2	62	157	47.5																	6	3	124	86	4.21	3.89	4.84	3.02	1.26	68	80	33.5	16	26	18
030104	1	61	174	75	1	1	1		4		1										5	1	145	80	5.91	1.1	4.74	2.47	1.24	97	102	40	18	25	12
030105	2	73	162	64	1	1			3				4		1						6	3	135	82	5.51	1.59	5.78	3.21	1.18	93	99	36.5	18	46	18
030106	2	72	158	56	1	1															6	3	140	82	4.21	6.82	5.47	3.13	1.66	89	100	35	15	35	10
030107	2	76	155	64	3				8			1									6	3	130	80	4.44	4.93	4.09	2.17	1.41	96	110	34	16	30	12
030108	2	52	160	70	1	1															6	2	112	79	5.35	1.93	5.55	3.05	1.54	94	106	37	16.5	50	30
030109	2	60	155	75	1	0															6	3	135	85	3.96	1.9	5.38	2.93	1.42	107	109	44	16	55	30
030110	1	63	172	70	1	1															5	2	125	81	4.65	1.74	4.01	2.07	0.98	94	97	40	16.5	35	10
030111	2	64	155	50																	6	1	120	70	4.76	0.94	4.46	2.16	1.59	70	83	30	16	35	20
030112	2	35	156	58																	6	3	116	74	4.02	1.65	3.19	1.71	1.35	77	95	30	15	38	28
030113	2	42	153	57.5																	6	1	116	72	4.55	0.79	4.28	2.31	1.38	77	92	35	17	42	20
030114	2	42	158	56																	6	3	120	70	4.54	1.46	4.1	2.04	1.45	76	83	38	18	30	20
030115	2	32	167	55																	6	1	120	70	3.98	0.52	4.4	2.36	1.52	73	96	31	14.5	28	5
030116	2	58	158	54	1	0															6	3	130	80	4.32	1.71	5.69	3.3	1.64	70	84	32	15.5	40	30
030117	2	56	157	50	1	1															6	3	127	70	4.07	1.39	4.58	2.45	1.67	75	89	32	15	40	22
030118	1	58	165	75	1	1			3												5	1	136	82	4.04	1.69	4.75	2.68	1.56	92	104	40	18	45	30
030119	2	52	156	67.5	1	1															6	3	150	90	4.92	1.17	4.44	2.4	1.52	87	102	35	16	46	28
030120	1	53	172	70																	3	3	112	80	4	0.86	3.85	2.19	1.19	95	107	42	20	50	42
030121	2	46	150	54																	6	3	128	65	4.11	1.42	4.46	2.12	1.56	69	82	33	15	40	8
030122	2	54	160	65	1	1															6	3	158	96	4.39	0.92	3.95	1.92	1.36	91	105	37	16	48	30
030123	2	53	170	89																	6	3	149	86	4.55	0.97	4.67	2.36	1.68	113	116	41	18	52	50
030124																														88	103	38	16	18	11
030125	2	25	165	65																	6	3	110	70	3.35	1.66	3.52	1.88	1.13	88	100	33	15	38	30
030126	1	51	176	72	4		1														5	3	128	76	6.44	1.52	3.8	1.91	1.31	87	99	41	21	50	35
030127	2	48	157	56																	6	3	115	73	3.87	0.44	4.16	2.04	1.53	76	83	37	19	40	23
030128	1	73	168	76																	6	3	130	80	4.29	0.97	3.05	1.62	1.15	90	102	41	20	45	35
030129	2	67	156	60	4		1														6	3	130	80	5.66	0.65	4.41	1.84	2.1	83	97	36	18	42	22
030130	2	56	160	65																	6	3	130	78	5.46	1.53	6.74	3.84	2.04	74	91	35	15	38	26
030131	1	31	175	80																	3	3	120	70	5.64	2.64	7.08	4.62	1.53	96	110	40	25	58	50
030132	2	54	158	62																	6	3	130	80	4.53	1.88	5.12	2.97	1.5	79	86	32	18	42	23
030133	1	57	170	69																	2	3	130	80	4.16	0.91	3.25	1.43	1.3	89	102	44	26	56	48
030134	2	58	157	63																	6	3	120	75	3.98	1.5	4.37	2.27	1.49	79	90	36	19	30	23
030135	1	53	170	70																	2	1	130	80	5.01	2.99	3.97	2.39	1.15	93	103	33	20
030136	2	53	153	55	2																6	3	125	85	4.01	0.99	5.12	2.49	2.22	84	102	30	15
030137	2	79	155	48	2																6	3	115	65	4.33	1.67	6.44	3.89	1.87	77	94	30	15
030138	1	81	162	65	1	0															6	1	135	85	4.78	1.25	4.18	2.3	1.54	90	102	33	20
030139	2	61	160	50																	6	3	105	65	4.6	1.44	3.55	1.61	1.41	72	86	31	16	45	12
030140	1	61	170	55																	6	1	120	75	3.9	1.04	3.99	1.91	1.78	76	89	40	19	48	15
030141	1	60	170	70																	6	3	120	80	4.97	1.97	4.74	2.82	1.12	92	105	43	25	65	31
030201					1	0																								86	102	38	21	3	4
030202					1	0																								80	92	40	17	3	2
030203	1	72	173	81																	6	3	114	82	4.92	1.16	4.7	2.6	1.29	93	102	40	20	28	27
030204	2	74	152	66	1	1	1		4		1										6	3	148	70	4.26	1.42	4.42	2.43	1.36	92	105	36	16	29	27
030205	2	82	161	58	1	0			2				4		1						6	3	140	75	5.26	1.42	4.42	2.43	1.36	90	100	36	17	25	24
030206	1	82	174	85	1	1			2												4	3	170	100	4.46	1.3	5.13	2.7	1.6	92	108	43	21	40	35
030207	1	55	171	72	1	1															6	1	130	95	4.71	1.09	4.9	2.49	1.55	89	101	41	21	28	23
030208	2	53	163	67	1	1															6	3	110	67	4.54	2.04	4.67	2.81	1.22	85	101	40	20	40	38
030209	2	66	155	70	1	1															6	3	134	65	4.94	1.4	6.31	3.32	1.52	97	110	38	18	35	33
030210	1	57	162	92	1	1	1		4		1										5	1	150	86	6.08	2.98	4.84	2.25	1.5	110	123	43	20	50	42
030211	2	52	155	55.3	1	1															6	3	122	81	5.2	0.87	6.63	3.05	2.13	80	98	32	17	20	18
030212	2	55	162	57																	6	3	118	80	5.83	0.75	5.22	2.35	1.96	73	93	33	16	28	28
030213	1	66	175	80	3																6	1	140	85	5.96	1.62	4.56	2.27	1	90	103	38	20	31	31
030214	2	44	163	74	4		1														6	1	120	80	6.02	1.72	4.63	2.38	1.28	91	103	35	16	33	30
030215	2	68	153	65	1	1															6	3	142	86	5.37	1.04	4.41	2.25	1.17	78	92	37	16	28	27
030216	2	58	158	60	1	1			2												6	3	134	78	4.73	0.67	3.92	1.86	1.25	87	97	34	17	30	31
030219	1	62	172	65																	2	1	120	70	5.5	0.73	5.1	2.42	1.46	83	90	36	16	26	24
030220	2	57	158	56	1	1															6	3	130	72	4.58	2.37	5.83	2.93	1.66	73	97	33	16	12	20
030221	2	57	150	42																	6	3	115	70	4.9	1.24	5.8	2.94	1.39	77	90	31	15	9	15
030222	1	57	173	68	1	0															2	1	132	75	5.18	0.8	3.84	1.75	1.01	83	96	40	18	22	20
030223	2	69	163	80	2				6												6	3	138	78	4.74	0.62	5.18	1.62	2.25	104	108	37	18	38	32
030224	1	39	187	120																	3	1	118	70	6.46	1.44	3.92	1.94	0.91	110	116	46	21	40	38
030225	2	68	153	68	1	1															6	3	135	71	4.78	2.24	5.53	3.25	1.49	90	105	40	22	36	40
030226	2	66	160	60	1	1															6	3	142	80	4.18	2.91	6.42	3.51	1.74	84	97	36	16	30	29
030227	2	76	155	57																	6	3	125	68	4.25	1.62	5.24	2.37	1.34	80	95	37	18	27	27
030228	2	58	158	60																	6	3	135	80	4.32	0.85	4.7	1.84	1.42	80	92	34	18	28	30
030229	2	49	160	65																	6	3	120	80	4.24	0.47	4.96	2.33	1.38	80	95	32	17	30	27
030230	2	55	158	65																	6	3	120	90	5.48	1.26	5.41	2.63	1.78	89	105	33	15	30	30
030231	2	62	157	47																	6	3	110	90	5.32	1.5	6.35	3.14	1.82	79	89	30	15	30	22
030232	1	71	170	70																	3	1	130	78	5.75	1.34	4.9	2	1.25	85	97	40	19	28	29
030233	1	68	175	80																	6	3	120	85	8.8	0.71	3.64	1.64	1.03	101	99	40	19	30	28
030234	1	32	170	75																	6	3	140	80	5.21	2.43	7.49	3.7	1.35	85	97	32	19	35	34
030235	1	49	171	63																	5	1	138	85	4.53	3.87	5.25	2.67	1.46	88	100	41	20	30	28
030236	2	51	164	60																	6	1	125	75	4.66	1.51	5.97	2.5	2.41	81	93	35	18	28	31
030237	2	55	160	51																	6	3	120	70	4	1.06	4.33	1.68	1.57	78	94	35	18	24	26
030238	2	51	162	54																	6	3	62	78	4.12	0.49	4.02	1.65	1.39	77	94	32	20	24	20
030239	2	55	162	65																	6	3	125	80	4.43	1.55	5.01	2.65	1.53	83	100	35	15	31	28
030240	2	53	168	70																	6	3	120	75	5.63	1.93	4.72	2.08	1.28	92	100	40	19	28	32
030301	2	32	165	75																	6	1	120	70	3.99	1.79	4.27	2.23	1.31	95	102	37	20	20	16
030302	2	47	163	67	1	1															6	1	130	85	4.13	1.08	4.59	2.4	1.57	99	100	36	21	18	18
030303	2	43	160	65																	6	1	110	65	4.53	0.71	3.57	1.36	2.03	93	99	34	20	17	14
030304	1	63	175	79																	3	1	130	80	4.71	3.23	3.42	1.73	0.98	105	103	40	19	28	22
030305	2	55	157	45																	6	3	110	70	5.17	1.94	6.12	3.25	2	80	82	30	13	18	14
030306	2	60	165	70																	6	3	120	80	4.89	2.76	5.31	3.03	1.46	98	106	36	18	22	18
030307	1	59	180	88	1	0															6	3	110	65	4.6	3.11	5.45	3.26	1.32	108	106	40	22	30	24
030308	2	42	160	65																	6	3	120	80	5.12	1.45	3.65	1.96	0.96	95	103	36	22	21	18
030309	2	44	160	50																	6	3	100	60	5.07	1.55	4.81	1.01	1.38	88	90	30	16	17	13
030310	2	59	160	65	4		1		5												6	3	130	80	9.5	1.69	5.3	2.96	1.16	92	98	34	18	19	15
030311	2	54	154	75																	6	3	130	80	4.74	2.05	4.16	2.16	1.24	110	131	40	24	30	26
030312	1	61	170	69																	3	1	130	80	5.2	2.34	4.8	2.58	1.15	110	112	38	24	34	25
030313	1	55	178	83																	3	1	125	70	9.99	2.4	5.01	2.73	1.26	112	113	38	26	35	24
030314	2	45	166	57																	6	1	115	65	3.81	1.26	4.1	1.67	1.83	90	95	33	18	18	15
030315	1	45	170	70																	2	1	130	80	6.09	1.81	5.03	3	1.26	95	102	38	25	25	22
030316	2	56	170	75																	6	3	110	80	4.5	1.14	5.77	2.73	1.71	92	108	35	25	22	21
030317	2	64	158	68																	6	3	110	70	4.15	1.61	5.76	3.03	1.76	92	96	33	15	25	24
030318	1	64	173	70	1	1			2												4	1	120	70	6.25	2.74	4.65	2.4	1.39	108	106	37	23	36	24
030319	2	38	158	67																	6	3	120	70	4.59	0.74	3.94	1.88	1.21	99	106	34	24	18	20
030320	1	60	176	75	1	1															6	1	140	90	4.66	0.97	4.58	2.19	1.86	115	117	40	24	30	30
030321	2	65	157	53	1	1															6	3		90	4.3	1.87	5.32	2.7	1.85	80	91	33	15	32	21
030322	1	65	168	72.5	1	1															6	3	180	80	4.05	1.55	3.67	1.64	1.59	84	92	34	16	17	23
030323	2	46	164	72																	6	3	120	60	5.24	0.9	3.72	1.81	1.37	108	110	35	25	36	24
030324	2	48	157	60																	6	3	110	70	5.91	0.76	3.86	1.88	1.44	91	94	34	14	23	20
030325	2	45	152	54																	6	3	120	75	3.94	1.66	5.04	2.53	1.24	77	90	35	16	30	20
030326	1	73	170	85	1	1															5	1	130	80	4.15	1.18	4.56	2.25	1.67	110	118	40	26	40	30
030327	1	57	164	80	1	1															6	3	140	80	5.52	1.13	3.27	1.69	1.08	102	108	36	20	30	22
030328	2	46	160	54																	6	3	110	70	4.01	1.03	3.39	1.44	1.59	94	100	34	22	26	20
030329	1	42	178	70																	3	3	130	86	3.91	3.98	5.65	3.39	1.5	96	100	34	20	28	20
030330	2	44	157	60																	6	3	110	70	4.08	2.15	4.72	2.85	1.22	95	103	33	21	25	18
030331	2	60	154	58																	6	3	115	70	4.91	2.23	5.8	3.53	1.36	90	94	30	20	24	20
030332	2	59	160	50																	6	3	120	80	4.01	1.09	4.32	2.35	1.27	91	95	31	21	26	21
030333	2	50	154	50																	6	3	120	75	3.91	1.31	4.18	2.2	1.46	92	96	30	20	25	22
030334	2	39	160	60																	6	3	120	80	4.66	1.21	4.08	2	1.8	94	96	32	22	23	21
030335	2	65	165	70	1	0															6	3	130	90	4.9	1.51	5.03	2.98	1.26	95	100	32	22	25	22
030336	1	35	185.5	100																	6	3	120	80	4.04	2.23	2.85	1.5	1.16	110	108	40	26	38	25
030337	1	45	178	72																	3	2	120	70	4.61	2.52	6.1	2.63	1.19	100	102	38	20	24	18
030338	2	54	162	49																	4	1	100	80	4.07	0.5	4.22	1.76	2.09	77	87	29	16	10	15
030339	2	58	160	50																	6	3	140	80	6.05	1.95	4.8	2.51	1.46	110	118	42	24	40	25
030340	2	51	167	80																	6	3	120	80	8.79	2.03	5.94	3.65	1.44	111	116	40	25	41	24
030341	2	55	172	76																	6	1	110	80	5.1	1.67	8.26	5.3	2.05	98	108	40	24	29	25
030342	2	44	165	60																	6	3	140	90	4.54	1.44	3.75	1.62	1.71	80	100	35	18	30	21
030343	2	63	160	55																	6	3	118	70	4.23	1.44	4.09	2.16	1.39	91	96	30	21	25	22
030344	2	58	158	60																	6	3	120	75	3.99	1.37	4.57	2.31	1.61	92	93	33	23	25	21
030345	1	44	173	85																	3	1	130	80	4.3	2.75	4.77	2.76	1.28	110	98	38	24	39	26
030346	2	54	160	62	1	1															6	3	150	90	4.36	1.53	4.09	2.01	1.75	92	96	30	18	24	20
030347	2	51	160	65	1	1															6	3	140	80	4.37	0.83	4.53	1.95	1.65	98	108	37	22	28	20
030348	1	58	173	80	1	1			2												5	1	150	90	4.06	1.68	4	2.11	1.46	99	103	40	26	38	25
030349	2	55	156	60	2																6	1	115	80	4.62	1.37	4.44	2.39	1.41	90	95	38	21	25	19
030350	2	60	156	50																	6	3	110	60	4.72	3.4	5.72	3.74	1.39	90	96	30	17	20	18
030353	2	65	152	67																	6	3	130	80	6.02	4.27	6.51	3.08	1.67	85	87	32	16	20	18
030354	2	68	160	70																	6	3	120	70	5.19	1.05	7.43	2.86	2.19	94	102	36	18	20	21
030355	2	56	162	70																	6	3	120	90	4.96	0.93	5.18	2.65	1.83	94	108	34	16	40	23
030356	2	50	160	50	2		1		4		1										4	3	130	70	7.22	2.05	4.8	2.84	1.15	85	89	34	16	30	22
030357	1	50	168	80																	3	2	145	90	5.09	3.4	4.31	2.54	1.19	103	102	41	18	30	24
030358	1	53	162	50	4		1														6	3	110	70	7.49	0.64	3.48	1.62	1.34	74	85	34	16	10	23
030359	2	57	157	64																	6	3	110	70	5.72	10.23	6.35	3.19	1.82	92	100	34	16	30	33
030360	1	50	175	75																	5	1	115	80	9.53	1.57	6.63	2.95	1.38	95	99	35	27	30	21
030361	2	47	160	63	4		1														6	3	120	80	5.6	2.38	4.65	2.4	1.28	88	96	34	20	20	20
030362	1	49	167	85	4		0														3	1	120	80	7.49	1.36	5.63	2.6	1.51	98	99	37	20	22	18
030363	1	59	160	65	4		0														4	3	150	90	13.48	0.52	7.04	2.74	1.94	92	98	36	17	30	20
030364	1	46	175	70																	2	1	110	65	4.02	1.6	5.23	2.37	1.04	98	100	37	20	30	22
030365	2	45	173	71																	6	3	110	70	4.84	1.49	5.97	2.19	1.87	86	104	34	17	32	31
030366	1	47	176	84	1	1															6	1	150	110	4.81	2.53	5.14	2.85	1.13	97	105	41	18	28	23
030367	2	36	160	56	1	0															6	3	130	90	5.14	0.88	4.51	1.5	1.47	70	85	31	16	20	16
030368	2	61	155	60																	6	3	120	80	5.58	3.01	8.44	4.07	1.79	83	100	34	17	23	14
030369	1	62	170	70																	3	3	125	75	5.52	2.64	8.93	4.35	1.58	104	102	37	19	21	20
030370	1	59	172	75																	3	3	120	75	5.88	1.3	6.53	2.8	1.19	95	98	39	19	22	16
030371	2	43	164	55																	6	3	120	80	4.93	0.62	4.86	2.08	1.59	70	84	30	16	20	16
030372	1	58	176	65																	3	1	118	70	4.75	1.61	4.46	2.09	1.12	91	99	35	17	30	21
030373	2	58	160	51																	6	3	115	72	5.93	1.79	5.59	2.44	2.37	70	86	31	17	20	16
030374	2	56	160	65.5																	6	1	118	70	4.61	1.67	4.54	2.02	1.61	90	93	38	18	22	17
030375	2	61	168	50	1	0			2												6	3	118	75	5.23	0.97	4.15	2.18	1.15	70	86	32	18	20	17
030376	1	50	180	50																	2	1	140	90	4.37	0.96	4.57	2.25	1.22	71	85	30	17	21	17
030377	2	52	162	64																	6	3	130	70	3.75	1.4	4.26	1.94	1.42	75	84	38	17	21	15
030378	1	50	170	80																	6	1	140	80	3.41	1.98	4.94	2.64	1.6	95	97	35	19	21	19
030379	2	54	155	60																	6	3	130	80	3.95	3.68	3.69	1.73	1.2
030380	2	66	160	83																	6	3	120	75	5.07	1.61	5.86	2.79	1.42	72	100	40	18	26	22
030381	2	50	160	58																	5	1	90	60	6.22	1.48	4.76	2.58	1.16	88	100	36	22	22	18
030382	2	53	160	61																	6	3	90	60	4.19	0.93	4.88	2.5	1.54	90	101	35	23	21	18
030383	2	53	160	62																	6	3	120	75	4.68	1.35	5.46	2.59	1.38	73	87	32	19	20	17
030401	2	58	153	51																	6	3	129	76	4.12	1.61	4.47	2.37	1.26					42	19
030402	2	42	166	68																	6	3	108	68	4.6	0.75	4.55	2.09	1.86	82	105	32	16	20	20
030403	2	44	172	73																	6	3	110	70	4.37	1.54	3.81	1.69	1.61	83	102	30	5
030404																														110	118	43	20	52	60
030405	1	66	170	62																	4	3	125	83	4.07	0.88	4.27	1.99	1.32					18	16
030406	2	64	162	65	1	1			2				4		0						4	3	143	87	4.85	2.03	4.99	2.62	1.21					20	21
030407	1	40	166	77	1	0															3	3	151	97	4.41	1.41	4.44	2.4	1.13	90	97	41	18	20	30
030408	1	67	170	89																	6	3	154	93	6.62	1.55	3.37	1.71	1.02	102	110	38	18	18	19
030409	2	67	161	70.5	1	1															6	3	128	88	4.6	1.51	4.23	2.15	1.38	102	111	35.5	8	13	20
030410	1	60	168	75	1	1															4	1	140	90	4.4	1.42	3.29	1.65	1.06	94	102	42	17	20	28
030411	1	35	175	80																	6	3	120	80	4.46	0.68	2.98	1.5	1.07	96	106	43	18	26	35
030412	1	63	168	63	1	0															6	1	149	89	6.14	1.08	5.51	3.12	1.43	93	97	41	16	23	24
030413	2	46	163	56																	6	3	110	74	3.91	1.63	4.11	1.9	1.75	77	94	30	14	16	13
030414					4		1		1	1																				70	75	30	16	33	23
030415	2	69	157	50	1	1															6	3	135	84	4.21	1.57	4.74	2.7	1.31	80	92	34	16	18	16
030416	1	72	175	50	6																6	3	109	77	4.38	1.8	3.12	1.5	1.36	73	90	26	14	16	14
030417	2	61	157	67	1	1			2				4		1						6	3	130	76	7.15	1.82	4.76	2.89	1.42	92	105	34	15	30	18
030418	2	37	158	79																	6	3	125	70	6.34	1.37	4.83	2.68	1.44	99	110	37	18	29	29
030419	1	69	173	74	1	1															6	3	122	75	4.34	1.04	3.63	1.9	1.11	88	100	38	17	19	22
030420	2	76	164	65	1	1															6	3	135	80	4.46	0.81	6.06	2.43	1.91	86	100	34	16	22	20
030421	2	61	160	55	1	1															6	3	135	85	4.62	2	5.07	2.77	1.5	77	93	34	15	19	19
030422	2	62	160	68	1	1	1		4		1										6	3	131	77	8.91	1.74	3.37	1.79	1.22	88	100	34	18	20	17
030423	2	58	158	60	1	1															6	3	135	85	4.25	0.8	4.13	1.94	1.64	83	97	34	15	18	14
030424	2	63	162	50																	6	3	118	70	4.09	1.62	3.75	1.72	1.77
030425	2	40	162	60																	6	3	120	70	4.67	1.59	2.79	1.27	1.31	85	95	30	15	15	14
030426	2	68	157	55	4		1														6	3	125	80	10.05	1.32	7.14	3.11	1.64	80	92	37	15	21	15
030427	1	69	168	60																	4	1	130	80	5.73	2.05	5.48	2.41	1.08	90	100	40	16.5	10	20
030428	2	57	158	70																	6	3	138	85	4.17	2.24	5.98	3.4	1.67	80	104	34	16	40	35
030429	2	63	156	67.5	1	1															6	3	138	90	5.12	1.3	4.17	2.24	1.36	98	104	27	17	20	21
030430	1	65	167	65																	4	3	134	80	5.1	1.11	4.27	2.25	1.2	85	99	26	18.5	8	19
030431	1	58	166	65	4		1														6	3	114	81	5.83	1.37	3.78	1.89	1.22	94	102	26.5	17	10	18
030432	2	55	154	50	4		1														6	3	138	82	6.5	0.71	4.23	2.03	1.36	83	96	23	16	22	22
030433	2	36	168	50																	6	3	125	80	5.6	2.77	4.17	2.47	1.08	70	85	30	15	15	14
030436	2	60	163	65																	6	3	130	80	4.09	1.49	4.36	2.36	1.31	100	100	32	16	15	14
030437	1	60	176	64																	2	3	131	72	4.46	0.96	4.61	2.29	1.49	82	90	40	19	6	6
030438	2	60	160	52																	6	3	120	80	4.46	0.72	3.81	1.85	1.44	78	88	32	15	20	32
030439	2	57	158	68																	6	3	149	72	4.04	1.55	5.01	2.75	1.55	90	104	35	15	35	36
030440	1	59	177	75	4		1														6	1	117	70	7.51	1.01	4.08	1.96	1.48	91	100	38	20	22	22
030441	2	60	150	54																	6	3	120	80	4.75	1.14	4.78	2.76	1.41	80	98	31	14	21	19
030442	1	63	164	72																	6	1	125	84	4.27	1.14	4.2	2.29	1.44	86	100	38	17	28	22
030443	2	65	162	51	2																6	3	90	60	3.95	1.4	6.46	3.69	1.76	70	92	30	15	18	16
040101	2	45	160	52.5																	6	1	118	71	4.86	1.14	4.11	2.11	1.4	76	82	32	17	5.1	6
040102	2	44	173	70																	6	3	120	70	5.56	1.18	4.97	2.59	1.34	80	90	25	12	6.8	7.3
040103	2	45	166	65																	6	3	120	80	5.62	1.21	5.1	2.71	1.51	80	86	32	18	5.2	6.7
040104	1	38	173	77																	6	3	120	75	4.13	2.83	5.11	2.71	0.89	80	87	25	20	6.3	7.5
040105	1	34	180	88																	6	3	120	80	4.45	1.09	4.57	2.47	1.2	82	88	36	18	6.5	7.8
040106	2	45	161	51																	6	3	98	60	4.84	0.54	4.39	2.1	1.32	72	80	30	17	5.1	6.2
040107	2	43	158	50																	6	3	110	80	4.99	0.64	3.84	1.76	1.12	79	84	32	18	6	7.2
040108	2	36	163	60																	6	3	120	70	5.24	0.5	4.48	2.4	1.26	76	82	30	19	5.7	6.8
040109	2	40	160	62																	6	1	100	60	5.2	0.48	3.82	1.78	1.26	72	80	30	20	6	7.2
040110	2	42	150	47																	6	3	100	70	4.5	0.84	3.66	2.01	0.88
040111	2	46	162	60																	6	3	120	70	5.27	0.94	4.59	2.65	1.1	76	82	30	19	5.8	6.5
040112	2	33	156	65																	6	3	120	80	6.87	4.96	5.14	2.4	0.94	80	86	30	19	6.2	7.2
040113	2	51	160	63																	6	3	120	70	12.9	3.07	5.17	2.73	0.98	80	87	30	19	7.8	7.9
040114	1	37	170	60																	4	3	120	75	5.72	1	4.52	2.49	1.11	80	86	35	17	6	8
040115	2	36	160	60																	6	3	120	80	5.06	0.49	3.85	2.07	1.05	80	86	30	18	6.2	7
040116	2	51	160	65																	6	3	130	75	5	0.81	6.43	3.61	1.45	76	82	30	19	6.3	7.5
040117	1	56	170	75																	6	3	130	75	5.76	1.06	3.45	1.52	1.08	82	88	30	19	6.2	7.8
040118	1	49	182	85																	5	2	130	80	5.06	4.21	4.24	0.83	1.66	83	90	30	19	6.3	7.9
040119	1	51	170	140	4		0														6	3	130	75	9.18	1.25	5.16	2.89	1.17	74	80	29	18	6	7
040120	2	46	172	57																	6	3	130	70	5.31	0.93	6.3	1.72	3.5	71	88	32	13	5.8	6.7
040121	1	55	175	63	4		1														6	3	130	105	6.04	2.23	4.57	2.47	0.92	80	86	30	19	6	7
040122	1	53	168	95																	3	1	120	80	4.79	0.47	5.05	2.62	1.82	76	82	30	19	7	8
040123	2	63	164	65																	6	3	130	75	5.13	0.98	4.75	1.28	2.44	80	86	29	18	6.8	7.2
040124	2	46	160	65																	6	3	130	75	5.3	1.22	4.89	2.71	1.31	80	88	29	18	6.7	7.2
040125	2	43	154	51																	6	3	130	75	5.2	0.93	5.9	3.26	1.56	71	88	32	14.5	6	7.2
040126	2	34	161	46																	6	3	95	65	5.3	1.03	5.44	2.81	1.51	69	88	32	14	16.5	2
040127	2	20	166	55																	6	3	120	80	4.88	0.86	4.45	2.26	1.43	80	88	29	19	5.3	6.3
040128	2	26	160	50																	6	3	120	80	4.93	0.6	4.94	2.8	1.19	80	88	30	20	7	8
040129	2	25	165	45																	6	3	115	54	5.05	0.63	4.06	1.76	1.44	72	78	25	16	5	6
040130	1	49	175	110																	6	1	116	79	6.01	1.71	4.9	2.66	1.23	100	110	30	19	6.7	7.8
040131	2	53	162	70																	6	1	130	80	5.42	1.58	7.52	4.45	1.53	78	88	30	19	6	7.3
040132	1	63	172	45																	3	1	130	75	5.05	0.76	4.7	2.12	1.81	80	90	30	19	6.2	7.2
040133	2	47	162	60	1	0															6	1	130	80	5.16	1.18	5.01	2.69	1.17	76	82	18	11	15	18
040134	2	48	160	65																	6	3	120	76	5.18	1.07	4.75	2.57	1.09	73	78	23	12	17	19
040135	2	54	164	50																	6	3	110	70	5.73	1.07	6.3	3.67	1.36	72	77	23	12	15	18
040136	2	37	164	66																	6	1	130	80	4.89	0.76	4.49	2.42	1.19	72	77	23	13	18	20
040137	2	37	162	60																	6	1	120	75	4.86	0.73	3.78	1.82	1.34	76	81	20	10	16	18
040138	2	45	164	70																	6	3	125	80	5.1	3.38	3.55	1.48	0.7	90	95	28	16	15	20
040139	2	45	160	58																	6	3	120	80	5.73	0.87	4.85	2.38	1.7	70	85	25	13	12	15
040140	2	53	166	55																	6	3	110	73	5.33	1.86	5.97	3.52	1.04	75	90	26	14	15	18
040201	2	43	158	56																	6	3	120	70	4.88	1.13	3.79	2.04	0.93	73	85	34	14	15.6	42
040202	2	45	155	53																	6	1	130	80	5.47	0.88	4.95	2.88	0.82	70	82	34	14	14.2	40
040203	2	53	158	55																	6	3	120	80	4.62	0.57	4.1	1.92	1.6	73	86	36	15	15.8	38
040204	1	50	175	70																	4	3	128	78	5.12	2.27	5.04	2.75	1	85	96	35	17	19.3	30
040205	2	48	160	51																	6	3	120	70	5.57	0.85	4.46	2.21	1.69	72	84	38	10	16.1	45
040206	2	43	160	60																	6	3	110	70	5.9	1.57	3.46	1.55	0.86	75	83	32	13	16.2	39
040207	2	45	165	67	1	1															6	3	140	90	6.51	1.85	4.56	2.38	1.5	80	89	39	15	14.8	42
040208	1	47	175	85																	6	3	130	80	5.84	2.81	4.23	2.08	1.4	120	125	32	18	18	25
040209	2	42	156	60																	6	3	120	70	4.91	0.81	5.74	3.38	1.23	72	86	35	15	15.2	42
040210	2	44	155	65																	6	3	120	80	5.44	0.87	4.44	2.33	1.33	76	88	35	14	16	33
040211	1	44	174	72																	3	1	120	70	5.24	1.71	5.85	3.36	1.11	88	98	38	18	18.9	32
040212	1	43	167	72																	6	3	120	80	4.94	1.83	5.13	2.85	1.11	85	98	35	17	18.9	33
040213	1	55	172	76																	3	3	130	80	4.9	1.03	3.69	1.88	0.91	86	97	35	17	19.8	37
040214	2	44	160	60																	6	3	120	70	5.47	1.07	5.31	2.96	1.14	75	86	36	15	16.2	40
040215	1	37	175	70																	6	1	130	80	5.18	0.84	3.91	2	1.19	82	90	34	16	16.5	32
040216	2	25	165	50																	6	1	110	70	5.14	0.53	4.55	2.42	1.36	70	82	30	13	15.1	32
040217	2	44	158	65																	6	3	130	80	5.5	1.43	4.93	2.76	1.46	80	92	35	16	16.5	46
040218	1	76	170	75	1	1															6	1	130	80	7.96	2.07	3.29	1.18	0.71	98	108	39	19	20.6	40
040219	2	71	160	60																	6	3	120	80	5.13	1.38	3.96	2.31	0.73	75	88	36	15	15.6	34.8
040220	2	79	158	80	1	1															6	3	120	85	5.18	1.04	3.66	1.96	1.01	105	115	30	15	18	36
040221	2	49	163	55																	6	3	120	80	4.81	0.89	5.31	2.95	1.52	80	90	30	15	15	20
040222	2	57	169	60																	6	3	120	80	5.69	1.21	5.5	2.99	1.56	85	95	30	15	15	20
040223	2	32	173	70																	6	3	120	70	4.81	1.61	4.1	2.15	1.14	95	105	30	15	15	25
040224	1	40	172	79	1	1															4	1	110	90	4.93	2.74	3.94	1.69	0.95	86	98	36	18	18.2	38
040225	1	47	175	70																	6	3	130	85	5.88	1.87	5.19	2.96	1.12	105	110	32	16	16	22
040226	1	32	178	80																	6	3	130	80	4.54	2.91	3.96	1.91	0.75	110	115	32	18	18	23
040227	2	31	172	60																	6	3	120	80	4.59	1.11	4.42	2.17	1.59	80	90	30	10	10	20
040228	2	37	166	80																	6	3	120	80	4.9	1.43	4.88	2.72	0.99	86	99	38	18	16.9	42
040229	2	24	160	53																	6	3	100	60	5.1	0.82	3.92	2.13	1.03	70	82	35.5	14	15.2	30
040230	2	56	160	65																	6	3	128	90	5.1	1.66	4.76	2.54	1.22	79	86	34	16	14.8	38
040231	2	29	160	158																	6	3	120	85	5.2	1.98	5.64	3.18	1.03	78	88	36	20	16.8	38
040232	1	30	172	90																	5	1	130	80	5.2	1.56	3.69	1.74	1.07	80	90	34	15	17.3	29
040233	2	24	163	67																	6	3	125	73	5.2	1.45	4.62	3.32	1.15	86	92	20	13	18	20
040234	2	59	164	80																	6	1	107	56	5.7	1.76	4.71	2.38	1.41	86	92	25	13	18	20
040235	2	62	160	65	1	1															6	3	130	80	7.1	1.4	5.22	3	1.06	88	93	20	12	18	21
040236	2	67	152	48	5				6												6	3	118	65	5.2	1.83	5.34	3.52	1.04	71	94	29	15	16	19
040237	2	48	170	140																	6	3	120	80	5.01	0.9	5.11	2.93	1.29	86	92	20	11	16	19
040238	2	58	160	55																	6	3	110	53	4.35	0.77	6.6	3.82	1.57	80	86	19	10	17	20
040239	2	45	170	90																	6	3	110	70	5	1.03	4.83	2.74	1.07	100	110	35	20	21	23
040240	2	37	165	80	1	1															6	1	135	95	5.27	1.47	4.37	2.39	0.89	107	112	38	16	19	22
040301	1	80	178	75	3																5	3	135	85	5	1.35	3.58	3.21	1.09	85	90	30	22	6	3
040302	2	41	156	56.2																	6	3	110	70	4.1	1.6	3.44	0.18	0.78	75	85	25	12	3	3
040303	2	49	159	60																	6	1	130	85	5.6	1.7	3.44	0.18	0.78	75	85	25	12	3	3
040304	2	40	160	60																	6	3	120	80	5.9	1.25	3.59	3.2	1.98	80	95	38	17	4	3
040305	2	44	160	53																	6	3	110	60	4.7	1.56	3.47	2.53	2.02	70	85	32	20	3	2
040306	2	44	160	60																	6	3	110	70	5.2	1.33	4.32	2.31	0.98	86	95	38	17	4	3
040307	2	46	160	54																	6	3	120	80	4.1	1.6	3.44	0.18	0.78	75	85	25	12	3	3
040308	2	48	160	43																	6	3	110	70	4.9	1.6	3.44	0.18	0.78	63	84	31	14	3	3
040309	1	39	180	80																	4	1	130	82	5.5	1.33	3.15	1.57	2.01	80	85	30	20	3	3
040310	1	40	172	70																	6	3	120	80	4.9	1.04	2.26	2.57	1.49	85	98	35	15	3	3
040311	1	38	168	75																	6	1	135	85	4.1	1.6	3.44	0.18	0.78	85	95	25	13	3	3
040312	2	36	155	58																	6	3	120	80	5.1	1.28	2.09	1.46	1.59	70	85	32	20	3	2
040313	2	43	158	63																	6	3	120	80	4.9	1.56	3.57	2.07	1.41	70	85	32	20	3	2
040314	2	39	155	47																	6	3	100	65	4.1	1.6	3.44	0.18	0.78	75	85	25	15	3	3
040315	2	44	162	50																	6	3	90	60	4.2	1.5	3.44	0.18	0.78	75	85	25	15	3	3
040316	2	63	160	60																	6	3	132	78	5.4	1.45	4.25	2.21	1.47	75	90	36	15	3	2
040317	2	61	160	65																	6	3	116	80	5.6	0.64	4.5	3.3	1.9	75	80	20	12	3	3
040318	2	63	153	55																	6	3	130	82	5.4	1.23	2.58	3.21	1.28	76	82	34	17	4	3
040319	2	69	156	60	1	0															6	3	133	80	5.3	1.42	4.22	2.12	1.6	80	85	35	18	4	3
040320	2	80	162	70	1	0															6	3	125	80	5.2	1.33	4.2	2	1.63	75	80	25	17	4	2
040321	1	44	170	80																	3	1	120	70	5.6	2.8	4.1	2.1	1.5	99	105	38	18	5	6
040322	2	65	160	65																	6	3	127	80	5.3	0.93	4.52	2.29	1.35	80	82	36	17	4	3
040323	2	64	158	58																	6	3	135	88	5.5	1.5	4.6	2.2	1.52	75	85	30	15	3	2
040324	2	69	155	49	4		0														6	3	133	82	4.8	1.44	4.5	2.21	1.53	75	83	32	16	2	3
040325	2	65	162	60	1	0			2				4		0						6	3	120	75	5.6	2.2	4.2	3.2	0.96	76	87	24	14	3	4
040326	1	85	175	70	1	0			4		0										6	3	144	82	5.9	1.55	4.2	2.22	1.5	80	95	38	19	5	3
040327	2	87	160	65	1	0			3												6	3	120	78	5.3	0.98	5.25	3.28	0.99	86	92	36	16	4	3
040328	2	58	170	70	1	0															6	3	133	85	5	1.43	4.4	2.33	1.55	75	85	36	15	4	2
040329	1	58	172	70	1	0															5	3	140	83	4.9	1.4	4.3	2.23	1.5	80	90	38	17	5	3
040330	1	62	170	62	1	0															6	3	110	70	5.9	1.6	3.44	0.18	0.78	82	85	26	14	3	3
040331	1	63	170	67																	5	3	112	74	5.2	1.03	4.26	3.3	1.4	82	96	38	17	6	4
040332	2	77	155	55																	6	3	115	75	5.7	1.6	3.45	0.19	0.88	74	80	24	10	3	3
040333	2	52	165	65																	6	3	135	82	5.2	1.32	4.65	3.35	1.17	76	82	18	10	15	18
040334	2	51	160	60	4		1														6	3	141	75	10.93	1.07	5.25	2.92	1.08	84	90	21	12	16	18
040335	2	39	168	60																	6	3	115	70	4.97	0.78	3.96	1.87	1.24	75	80	22	13	17	19
040336	2	47	163	70																	6	3	136	83	4.89	0.84	5.89	3.34	1.62	86	92	20	11	15	18
040337	2	45	173	80	1	1															6	1	120	70	5.17	2.06	5.16	3.03	0.94	76	85	23	13	19	21
040338	2	50	160	54																	6	1	108	68	5.7	0.76	4.71	2.38	1.41	66	90	30	18	15	18
040339	1	41	177	75																	6	1	125	78	4.5	0.8	3.33	1.37	0.97	76	82	22	14	15	17
040340	1	38	182	82																	3	3	125	80	5.01	2.57	5.32	2.85	1.08	90	95	26	18	16	18
040401	2	46	156	60																	6	3	100	60	4.9	0.45	5.8	2.94	0.93	80	83	38	16	5.2	6.5
040402	2	44	158	58.2																	6	3	105	52	4.6	1.21	5.92	4.07	1.42	80	90	37	16	5.5	6.5
040403	2	44	160	55																	6	3	135	83	4.95	1.19	4.67	2.78	1.6	80	91	37	15	4.7	5.3
040404	2	39	160	60																	6	3	112	74	5.1	0.93	5.27	1.1	1.12	85	95	40	15	5.5	6.5
040405	1	45	158	45	4		1														6	3	92	60	6.5	0.39	5.1	2.56	1.08	75	81	40	13	5.5	6.3
040406	2	38	154	46																	6	3	90	60	4.23	1.03	5.2	0.43	0.91	78	83	35	14	5.1	6.3
040407	2	43	160	60																	6	3	135	80	4.62	1.07	5.21	2.56	0.93	82	85	39	16	5.2	6.3
040408	1	42	178	76																	6	3	120	75	5.1	0.61	4.56	2.23	1.23	88	94	40	18	6	7
040409	2	37	165	63																	6	3	121	67	5.1	0.99	4.77	2.54	1.13	80	83	38	15	4.6	5.5
040410	1	54	180	78																	6	3	120	80	5.2	0.98	5.89	3.11	0.96	90	96	40	18	5.9	7.6
040411	1	37	172	70																	6	3	110	70	5.6	1.25	5.89	3.11	0.96	90	100	40	18	5.8	6.9
040412	2	54	158	57																	6	3	100	70	5.6	1.2	6	3.12	1.89	85	92	38	14	5.4	6.8
040413	2	50	161	53																	6	3	132	80	5.3	1.1	3.62	1.56	1.1	80	91	37	15	5.5	6.3
040414	2	57	156	58																	6	3	110	70	4.2	1.34	4.6	0.24	0.96	80	83	37	17	5.8	6.9
040415	2	56	154	62																	6	3	124	70	4.6	1.07	4.61	2.23	1.2	83	90	39	16	5	6
040416	2	67	158	60																	6	3	120	80	4.74	0.81	5.18	2.69	1.67	90	98	42	16	6	7.5
040417	1	67	165	60	3																5	3	110	70	5.68	0.56	4.08	2.21	1.28	86	90	40	16	5.8	7
040418	2	54	159	55	4		0														6	3	128	81	6.53	1.74	5.34	3.17	1.02	84	93	42	16	5.2	6.1
040419	2	43	162	60																	6	3	110	70	5.3	1.4	3.8	1.9	1.29	85	91	45	17	5.3	6.1
040420	2	38	168	80																	6	3	122	78	5.3	1.51	6.2	2.69	1.67	86	94	38	20	6	8
040421	1	51	172	65																	4	1	130	80	6.2	3.3	5.76	3.23	1.1	87	93	42	25	6.3	7.8
040422	2	36	162	67																	6	3	120	80	5.3	1.1	5.6	2.2	1.1	86	92	43	18	5.9	6.8
040423	2	39	160	53																	6	3	90	60	5.24	0.39	3.43	1.55	1.08	86	95	40	16	5.1	6.2
040424	2	62	156	63																	6	3	126	76	4.6	0.62	4.21	3.1	0.91	90	98	42	18	5.7	7.2
040425	2	59	160	55	2																6	3	126	70	4.3	1.01	5	2.92	1.18	78	88	40	15	5.5	6.3
040426	1	46	170	65																	3	1	130	80	6	2.14	5	2.8	1.63	86	95	43	18	5.8	6.9
040427	2	46	158	63																	6	1	120	80	4.97	1.06	4.51	2.43	1.22	83	92	40	16	5.2	5.8
040428	1	46	170	70	1	1															4	1	130	80	6.21	3.97	5.89	3.11	0.96	88	97	43	17	4.8	6.2
040429	2	45	165	65																	6	3	130	80	5.8	1.21	5.89	3.11	0.96	84	90	38	20	5.4	6.9
040430	2	72	168	65																	6	3	125	80	5.6	1.1	5.7	3.11	0.96	79	85	35	15	5.3	6.1
040431	1	50	180	72																	6	1	130	82	5.9	1.1	5.1	2.56	1.53	84	93	35	16	6	7
040432	2	46	154	55																	6	1	120	74	5.1	1.3	4.41	2.59	2.59	81	91	34	16	5.5	6.3
040433	1	45	170	76																	6	1	135	83	5.36	3.22	6.48	3.58	1.32	82	87	24	15	16	19
040434	1	48	178	80																	4	1	140	85	4.95	1.25	4.55	2.65	0.95	85	92	25	17	18	20
040435	1	50	176	80																	6	1	125	80	5.87	2.71	4.99	2.83	0.84	92	96	25	17	19	22
040436	1	42	172	80																	6	3	130	75	5.02	3.33	5.41	2.73	0.97	80	88	30	15	20	22
040437	1	52	173	75																	6	1	125	69	6.66	4.64	4.55	2	0.82	80	90	25	14	19	23
040438	1	67	172	70																	6	1	130	85	5.18	1.09	5.58	3.34	1.18	90	95	23	13	19	22
040439	1	60	171	90	1	1															4	1	130	85	6.25	1.51	6.37	3.69	1.25	105	110	30	17	21	24
040440	1	45	178	90	1	1	1		4		1										6	3	120	80	5.84	0.73	5.38	2.76	1.62	86	92	21	13	20	23
050101	1	44	172	68	1	1			2												3	1	140	100	5.6	1.57	4.6	2.1	1.35	86	102	35	21	25	17
050102	2	65	165	60	4		1														6	3	130	80	9.2	1.6	4	1.5	1.2	79	100	40	15	10	6
050103	2	77	165	65	1	1															6	3	135	80	6.7	1.75	4.4	2.07	1.17	92	102	32	21	35	30
050104	2	50	157	53																	6	3	110	80	5	1.01	4.1	2.1	1.1	92	102	36	22	15	20
050105	1	52	172	67																	6	3	130	80	5.1	0.94	3.9	1.8	1.1	86	100	30	20	15	18
050106	1	66	174	70																	6	3	135	80	5.1	1.47	4.1	2.1	1.9	86	100	40	20	20	18
050107	2	82	160	65	2																6	3	150	85	5.1	0.99	5.1	2.1	1.9	90	100	38	20	20	18
050108	2	60	158	52	1	1															6	3	135	80	5.1	1.01	3.8	2.1	1.1	92	96	32	22	20	15
050109	2	28	158	55																	6	3	120	71	4	0.61	3.9	1.6	1.73	73	90	28	17	20	22
050110	2	33	155	65																	6	3	110	74	5.2	1.67	5	2.2	1.45	80	100	40	20	25	20
050111	2	62	165	65																	6	1	130	85	7.8	1.94	6.1	2.94	1.51	86	120	40	18	20	12
050112	1	68	183	80	1	1															6	2	140	90	7.1	5.57	5.8	2.64	0.96	90	130	39	23	23	15
050113	2	52	160	63																	6	3	120	80	5.8	0.93	3.9	1.65	1.14	75	100	38	16	20	8
050114	2	59	162	60	4		1														6	3	120	70	4.8	1.7	4	1.66	1.2	76	110	38	18	15	10
050115	2	40	170	65																	6	3	120	70	5	1.1	4.5	1.4	2.1	80	92	30	16	20	15
050116	1	73	176	72	4		1														6	3	135	80	5	0.99	4.1	2	1.3	92	100	40	20	22	18
050117	1	58	178	80																	3	1	130	85	5.9	1.76	4.5	1.27	2.23	86	110	38	18	20	15
050118	2	56	163	62																	6	3	125	75	3.9	1.82	4.1	1.66	2.12	90	116	40	20	20	15
050119	1	58	175	70																	2	1	145	90	5.7	1.88	5	1.27	2.1	86	102	40	18	20	12
050120	2	62	170	65																	6	3	120	80	5.3	1.1	4.2	2.1	1.1	80	100	38	16	20	15
050121	1	54	170	66																	3	1	130	85	5.1	0.99	4.1	2.1	2	86	102	35	18	20	15
050122	1	61	180	80																	6	3	135	85	5.1	1.1	3.8	2.1	1.3	92	106	40	20	20	15
050123	1	49	170	70																	6	1	120	80	5.6	3	3.48	1.72	2.23	86	110	38	20	20	18
050124	1	56	173	75	1	1			2												6	3	160	95	5.7	3	3.6	1.68	2.23	90	106	40	20	25	18
050125	2	64	162	65																	6	3	135	80	5.1	1.6	5.6	2.6	1.5	86	100	38	20	22	18
050126	1	40	176	75																	2	1	130	90	5.7	1.76	4.5	1.23	2.2	90	102	40	20	22	18
050127	1	55	172	75	4		1														6	1	130	85	6.9	1.1	4.5	2.1	2.1	86	100	38	22	20	18
050128	2	54	162	63																	6	3	135	85	5.1	1.1	4.1	2.1	1.9	86	100	38	20	25	18
050129	2	41	160	62																	6	3	135	80	4.2	1.1	3.9	1.7	2.1	86	92	32	18	20	12
050130	2	77	152.2	44	5																6	3	144	67	4.8	0.91	5.6	2.68	1.69	68	86	26	16	18	20
050131	2	65	160	72	4		1														6	3	130	85	5.6	1.79	6.1	2.5	1.86	92	100	38	20	22	30
050132	1	85	172	66	3																6	3	130	85	4.9	1.1	3.9	2.1	2.1	92	102	40	22	25	18
050133	2	78	150	48																	6	3	130	75	5.1	0.91	5.6	2.09	1.6	78	88	36	16	20	15
050135	1	37	172	72																	3	1	135	80	5.1	1.08	3.7	1.7	1.1	92	110	40	24	30	20
050137	2	65	165	80																	6	3	150	87	4.8	0.94	4.4	1.67	1.78	86	100	36	20	20	22
050138	2	93	160	40																	6	3	139	97	4.8	0.94	4.4	1.67	1.78	74	92	36	20	26	15
050139	2	45	163	70																	6	3	118	72	5.2	1.6	4.7	2.1	1.45	80	98	40	20	20	20
050140	1	60	170	80	4		0														6	1	130	85	7	1.9	4.2	2.1	1.8	88	102	38	20	20	18
050201	2	58	157	54	1	1															6	1	145	90	5.3	1.51	4.6	2.26	1.27	76	86	30	12	30	25
050202	2	56	157	53																	6	1	120	80	6.2	2.78	7.1	2.83	1.51	72	82	28	12	30	25
050203	2	79	158	66																	6	3	135	75	5.3	2.08	4	2.32	1.43	81	92	32	15	35	25
050204	2	77	164	55	1	1															6	3	130	75	5.3	1.34	4.7	2.38	0.99	75	88	30	10	32	22
050205	2	77	154	59																	6	3	135	80	5.2	2.6	5	2.4	1.32	80	94	30	14	35	25
050206	2	53	162	65	1	1															6	1	145	88	5.3	1.45	5.5	2.87	1.25	82	92	35	15	38	25
050207	1	52	175	75																	6	1	139	85	7	2.69	4.4	1.94	1.36	85	109	41	19	38	28
050208	2	74	162	70	1	1															6	3	138	86	5.5	1.47	5.4	2.78	1.33	81	90	35	10	35	25
050209	2	71	162	63																	6	3	125	75	5.3	1.65	5.6	2.87	1.34	76	88	32	15	35	27
050210	1	76	174	72																	6	1	128	80	5.5	1.38	5.3	2.22	1.77	80	101	40	19	35	30
050211	2	58	168	60																	6	1	120	75	5.5	1.2	5.6	2.48	1.9	75	85	35	7	30	24
050212	1	62	174	75																	3	1	139	86	5.6	1.51	5.1	2.49	1.41	92	101	40	19	31	19
050213	1	58	177	70																	4	1	120	75	5.1	0.98	4.9	2.55	1.17	90	101	39	25	30	19
050214	1	62	170	62																	6	1	130	75	4.7	0.61	5	2.6	1.48	78	94	35	15	35	24
050215	2	61	162	60	4		1														6	3	140	85	9	1.88	5.1	2.51	1.37	75	88	38	16	38	28
050216	2	70	160	63	1	1	1		4		1										6	3	135	80	5.9	1.42	4.3	2.08	1.06	80	100	40	25	35	28
050217	1	70	170	73																	6	1	130	85	5.8	4.17	3.5	1.29	1.26	85	109	42	20	40	30
050218	2	60	161	64	4		0														6	3	130	80	9.4	2.2	7	4	1.44	80	91	32	13	35	25
050219	1	68	176	76	1	1															6	1	130	75	4.8	2.2	5.3	2.83	1.27	83	112	41	20	35	30
050220	2	53	165	60																	6	1	135	80	5	0.72	5.2	2.76	1.92	75	82	28	10	30	24
050231	2	45	162	68																	6	3	130	80	6.9	7.89	6.4	2.19	1.41	86	99	37	16	23	21
050232	1	48	183	102	1	1															4	1	130	90	6	2.15	6.9	4.17	1.08	94	108	39	21	20	17
050233	2	43	163	68	1	1															6	3	130	80	5.8	2.65	5.4	2.87	1.07	84	96	36	17	23	27
050234	1	47	172	71	1	1															4	1	120	80	5.7	1.5	6	2.87	1.5	81	96	35	19	18	22
050235	2	74	163	69	1	1	1		4		1										6	3	130	80	14.7	4.81	4.8	1.92	0.99	88	98	35	17	23	22
050236	1	78	172	70	1	1			2												5	1	130	80	6.6	6.32	6.7	2.71	1.19	80	91	36	18	19	15
050237	1	50	168	65																	6	1	120	70	4.8	1.79	5.8	3.05	1.46	80	98	36	19	10	12
050238	1	48	172	68																	6	1	130	80	5.4	1.38	4.9	2.17	1.52	80	100	36	18	18	16
050239	2	45	163	58																	6	3	130	80	4.8	1.1	5.8	3.1	1.65	78	94	36	15	16	18
050240	2	42	163	55																	6	3	120	70	4.9	2.63	5.45	3.2	1.8	75	88	35	16	20	18
050241	2	42	162	62	1	1															6	3	120	80	5.3	4.52	5.1	3.2	1.1	84	98	22	18	5	3
050242	2	43	165	52																	6	3	120	70	5.7	1.8	1.7	2.8	1.7	60	100	37	16	21	18
050243	1	48	172	80																	6	3	120	80	5.7	2	1.6	2.8	1.6	92	108	38	19	17	20
050244	2	72	165	62	4		0														6	3	140	80	6.84	1.8	1.7	2.8	1.7	72	90	37	16	20	26
050245	1	52	175	85																	4	1	135	85	5.2	1.6	6.58	2.8	1.58	88	98	43	18	7	10
050246	2	45	161	54																	6	1	120	80	4.9	0.84	5.5	3.29	2.07	70	90	32	15	20	22
050247	2	41	163	55																	6	3	95	75	5.1	0.88	4.2	2.77	1.54	68	95	28	16	10	9
050248	2	44	165	53																	6	3	120	68	4.7	1.23	3.4	3.26	1.56	78	88	36	16	18	20
050249	2	71	162	75	1	0			2												6	3	132	74	4.5	1.92	4.7	2.94	1.83	86	100	37	17	22	28
050250	1	74	166	73																	6	3	130	75	4.7	1.48	4.8	3	1.66	90	110	40	19	20	20
050251	1	56	165	71.5	1	0															2	1	150	90	5.4	0.97	4	2.47	1.84	80.6	100	40	20	20	20
050252	1	52	160	65	1	0															1	1	135	94	4.9	1.92	6.5	3.1	1.58	82	98	37	18	17	15
050253	2	60	152	59	1	1															6	3	132	85	5.7	1.23	3.4	2.26	1.68	93	93	33	20	22	28
050254	1	50	177	83	1	1			2												6	3	140	90	6.2	1.33	6	3	1.4	90	115	36	22	6	5
050255	2	34	164	72	1	0															6	3	130	85	5.5	3.12	4.7	1.92	2.94	86	102	24	21	5	4
050256	2	80	158	82																	6	3	130	75	9.1	1.68	5.2	2.33	1.78	86	92	38	17	8	12
050257	1	75	172	88	1	1															6	1	120	80	6.2	1.71	5.6	2.25	1.78	80	90	36	18	9	11
050258	1	45	178	75	1	0															4	1	135	95	4.8	1.37	4.4	2.8	1.47	95	105	38	18	10	12
050259	2	48	165	75	1	1			4		0										6	1	150	100	7	0.8	3.8	2.57	2	95	120	40	19	25	28
050260	2	45	160	60	1	1															6	1	130	90	4.1	2.43	4.7	2.9	1.56	70	95	37	16	20	22
050261	2	47	160	70	1	1															6	3	125	85	4.7	0.87	4.6	2.8	1.58	80	90	32	18	10	8
050262	1	44	160	71																	6	1	120	90	5.6	1.4	4.8	2.5	1.4	87	84	26	20	12	7
050263	1	39	168	70																	4	1	125	88	5.5	1.4	4.6	2.51	1.37	85	90	25	20	11	7
050264	2	69	159	56																	6	3	130	70	6.13	1.57	5.54	3.12	1.89	86	90	26	18	9	7
050265	1	70	165	72	1	1															6	1	140	90	5.3	1.8	5.6	3.2	1.52	86	99	31	25	10	6
050266	2	35	158	53.5																	6	3	120	80	4.8	1	4.8	3.2	1.6	75	90	32	15	8	6
050267	1	28	172	71																	6	3	130	80	4.7	0.68	3.4	2.1	1.41	80	98	36	20	5	6
050268	2	70	160	65	1	0			2												6	3	130	100	5	0.84	5.5	3.29	2.07	80	100	36	17	22	26
050269	2	42	165	55	1	1															6	1	130	90	4.9	0.68	3.4	2.1	1.41	65	80	32	16	6	8
050270	1	48	175	75																	3	1	135	85	5	3.27	4.8	2.19	1.12	90	105	40	19	17	16
050271	2	46	162	61																	6	3	123	82	4.9	1.5	5.3	2.54	1.52	82	96	37	16	21	28
050272	2	43	166	56	1	1															6	3	120	70	4.7	1.12	3.8	2.1	1.32	74	88	33	16	8	10
050273	1	66	180	83																	6	3	130	80	5.1	1.43	5.1	2.26	1.95	88	110	38	20	10	8
050274	2	64	158	62																	6	3	130	70	5.4	1.76	5	2.56	1.32	78	98	36	17	18	17
050275	2	48	158	60																	6	1	126	80	4.8	1.5	4.8	2.67	2.12	85	98	33	16	15	16
050276	1	37	171	73																	6	1	120	70	4.5	1.5	5.1	2.07	1.5	80	96	36	18	8	7
050301	2	46	157	56																	6	3	125	71	5.6	0.77	5.4	2.17	1.72	80	90	30	16	18	20
050302	2	58	160	73																	6	3	135	78	5.3	1.82	5.43	3.07	2.13	85	100	39	18	30	22
050303	1	66	176	75																	3	1	130	80	5.7	1.16	4.8	2.57	1.2	89	99	45	18	34	20
050304	2	37	179	70																	3	3	115	70	5.5	1.2	5.5	2.94	1.25	79	89	40	20	18	15
050305	2	59	170	62																	6	3	120	70	4.7	1.59	5.3	2.24	1.54	72	79	35	17	22	20
050306	2	85	158	65	1	1															6	3	160	90	4.6	5.23	4.3	1.72	0.99	89	96	35	15	30	24
050307	2	65	163	55	1	1															4	3	120	80	4.7	1.59	5.3	2.24	1.94	79	86	37	17	32	23
050308	2	67	162	65																	6	3	120	75	5.3	1.07	10.3	5.9	2.49	72	79	32	17	31	24
050309	2	34	170	62																	6	3	110	75	5.5	0.56	5.1	2.19	1.66	72	79	32	16	33	33
050310	2	63	155	67	3																6	3	130	76	5.24	1.87	5.03	2.86	2.17	80	90	30	16	29	22
050311	1	65	163	62																	6	3	137	72	6.02	1.42	2.73	2.71	2.03	94	100	43	19	30	20
050312	2	58	156	50																	6	3	115	70	4.5	1.2	4.5	2.8	1.2	63	72	33	16	27	20
050313	2	70	150	63	1	1															6	3	132	75	4.98	1.76	4.83	2.69	1.87	80	95	38	17	30	20
050314	2	40	163	63																	6	3	136	78	4.96	1.76	5.03	2.78	1.14	80	90	32	16	26	33
050315	2	53	158	63																	6	3	110	76	5.07	1.82	5.28	2.98	0.97	85	100	39	18	27	20
050316	2	60	157	69																	6	3	125	70	5.73	1.75	5.12	3.07	2.14	80	95	37	17	27	22
050317	2	54	160	63																	6	3	120	70	5.1	1.67	5.23	2.77	2.15	80	96	37	16	25	22
050318	2	63	153	67																	6	3	135	76	5.76	1.76	4.83	2.93	2.37	80	95	40	17	30	24
050319	1	66	164	67																	6	3	128	79	5.71	1.86	5.03	3.21	2.13	96	100	43	20	33	20
050320	2	78	160	73	1	1															6	3	127	68	4.73	1.69	4.93	2.91	1.79	86	100	37	18	30	26
050321	2	80	157	73																	6	3	137	82	5.62	1.67	5.13	2.83	1.86	85	100	40	18	30	24
050322	1	71	173	72	1	1															6	3	128	89	4.78	1.66	5.3	3.12	2.17	98	105	36	18	35	20
050323	2	70	156	72	3																6	3	120	71	5.07	1.66	3.18	2.86	2.13	82	85	32	17	30	24
050324	2	46	153	62																	6	3	120	70	5.3	1.66	4.81	3.12	2.13	80	90	35	17	18	16
050325	2	48	157	60																	6	3	133	78	5.17	1.72	4.83	2.98	2.14	80	90	30	16	15	15
050326	2	63	153	67																	6	3	126	78	5.4	1.67	4.82	3.13	2.12	84	95	38	18	36	22
050327	1	65	167	63																	6	3	127	76	5.76	1.86	5.43	3.02	2.13	95	100	40	19	30	20
050328	2	58	156	63																	6	3	136	82	4.76	1.63	5.07	2.84	1.73	80	95	36	17	30	24
050329	2	59	165	70	1	1															6	3	135	70	5.73	1.68	5.62	3.07	2.16	80	95	37	17	27	20
050330	1	59	165	67																	4	3	135	76	5.3	1.67	5.24	2.76	2.14	96	104	44	19	35	20
050331	2	49	160	60																	6	3	137	76	4.87	1.73	5.23	3.13	1.87	80	90	35	17	10	12
050332	2	37	176	74																	6	1	130	75	4.66	1.62	5.12	2.97	2.03	85	100	37	17	12	10
050333	1	48	172	75																	4	3	137	86	5.3	0.96	4.8	2.37	1.17	82	93	36	17	8	6
050334	2	43	160	53																	6	3	110	70	4.86	1.71	5.21	3.14	1.88	80	90	35	16	18	22
050335	2	65	156	63																	6	3	135	76	4.93	1.73	5.21	3.14	1.86	85	95	39	18	27	24
050336	1	46	173	79																	6	1	130	70	5.31	1.76	5.23	3.24	1.88	95	100	44	19	22	20
050337	1	65	170	70																	6	3	127	69	5.43	1.87	5.21	3.05	1.98	80	95	35	16	27	22
050401	1	69	167	80	1	1			2												5	3	130	80	4.7	1.22	3.6	1.39	1.58	86	97	37	18	29	13.1
050402	2	44	159	51																	6	3	100	60	4.3	1.35	4.9	2	1.16	73	88	31	15	10	10
050403	2	65	161	69	1	1															6	3	131	86	5.4	1.47	6.5	3.44	2.07	89	97	35	15	25	21
050404	1	67	172	82	1	1															3	1	127	78	4.7	1.93	4.2	1.77	1.3	93	101	36	16.5	25.5	21
050405	2	64	160	68	1	1															6	3	128	81	4.7	2.18	5.8	2.63	1.99	90	96	36.5	16	26	22.5
050406	1	57	178	85																	3	1	122	75	4.8	1.98	5.2	2.61	1.32	93	102	36	18	25	22
050407	1	72	170	70	1	1			2												6	3	137	75	5.2	1.73	4.2	1.89	1.06	87	94	35	17	10	21
050408	2	49	162	80	1	1															6	3	119	77	6.4	1.15	4.7	2.15	1.64	89	94	31	16	22	23
050409	1	44	178	90	4		1														6	3	135	82	14.6	13.93	5.7	1.34	1.12	95	102	37	18	27	24
050410	1	71	170	70	1	1			2												6	3	137	78	4.8	0.83	4.5	1.24	2.3	87	96	35	16	10.8	20
050411	2	72	153	60	1	1															6	3	130	80	4.7	1.75	6.1	2.87	1.74	94	106	38	18	20	23.5
050412	1	67	174	70																	5	1	128	78	5.4	1.64	6.9	3.32	1.93	103	107	33	14	32	30
050413	2	73	157	66																	6	3	128	83	5.3	2.23	4.5	2.13	1.15	91	108	34	19	40	15
050414	1	68	175	75																	4	3	121	75	5.1	1.56	4.8	2.32	1.23	94	101	37	17	26	20
050415	2	53	168	73.5																	6	3	102	71	5.58	1.37	4.5	2.21	1.22	84	98	32	17	24	29
050416	1	62	178	89	1	1															4	1	137	81	5	2.44	5	2.32	1.32	89	96	37	18	12	24
050417	2	61	164	72	2																6	1	130	80	5.7	1.56	5.5	2.93	1.31	96	103	36	17	40	13.8
050418	1	60	170	75	1	1															6	3	125	85	5.4	1.83	3.2	1.13	1.04	90	102	38.5	16	20	19
050419	2	64	160	56																	6	3	127	74	6.6	1.62	5	2.87	1.32	96	101	35	16	23	19.5
050420	2	66	164	68	1	1															6	3	117	69	4.9	2.26	5.5	2.68	1.34	91.5	108	33.5	16	30	28
050421	2	54	158	63	4		1														2	3	119	71	8.8	4.12	4.8	2.4	0.99	98	91	36	14.5	37	20
050422	2	63	160	63	1	1															6	3	137	70	4.8	2.35	5.7	2.07	1.55	98	104	38	17	18.7	21.5
050423	2	64	160	75																	6	3	142	94	4.5	2.61	4.4	1.9	1.22	85	109.5	33.5	16	34	28
050424	2	63	162	80	1	1															6	3	127	82	5	2.42	7.2	3.7	1.81	101	104	38.6	16.8	41	40
050425	1	60	158	76																	3	1	147	72	7	1.49	6	2.97	1.5	104	102	39	16	40	42
050426	2	60	156	50																	6	3	128	59	4.8	1.6	6	2.91	1.86	80	90.5	30	14.5	24	31
050427	2	60	164	59																	6	3	115	63	6.6	1.38	5.5	2.78	1.61	66	92.5	34	18	30	20
050428	2	57	166	75	1	1			2												6	3	135	82	5.3	3.27	8.1	4.8	1.29	82	96	33	21	23	26
050429	1	59	172	80	1	1															3	1	135	83	5.3	2.97	6.6	3.6	1.27	92	101	36	18	25	22
050430	2	35	164	82.5	1	0															6	3	125	79	4.6	3.01	4.3	1.72	4.46	91	105	39	16	41	52
050431	1	36	175	75																	3	1	118	71	5.5	2.91	7.9	1.25	4.49	88	98.7	37	16	26	36
050432	1	45	168	65	1	1															6	3	139	82	5.6	2.54	6.6	3.86	1.42	85	94	34	16	10	18
050433	2	64	152	64																	6	3	130	78	4.4	1.84	5.2	2.91	1.97	95	95	40	20	22	22
050434	2	60	160	58																	6	3	130	80	5.1	2.08	6.4	3.08	1.33	80	64	35	17	22	24
050435	2	67	160	64																	6	3	100	65	4.8	1.37	4.7	2.37	1.49	85	88	36	18	21	21
050436	1	68	166	67																	4	1	134	84	5.3	1.63	5.1	2.68	1.22	94	101	39	18	18	11
050437	2	65	155	59																	6	3	130	76	4.8	1.75	4.9	2.31	1.06	88	98	37	18	21	21
050438	1	49	173	75	1	1															6	3	127	84	4	5.39	5	2.43	0.99	95	97	39	7.5	19	12
050439	1	52	180	90																	6	1	130	80	5.4	1.59	5.4	2.46	1.32	105	100	41	18	20	18
050440	1	71	165	71																	6	1	134	82	6.4	2.31	5	2.67	1.29	85	94	39	20	18	13
050501	1	73	170	80																	6	3	130	80	0.49	1.61	5.8	3.59	1.46	75	110	31	16	1	16
050502	2	76	158	60	2																6	3	130	80	5.1	1.69	7.5	3.9	1.94	88	120	33	18	1	19
050503	2	82	160	62	1	1															6	3	135	87	5.4	1.83	6.4	3.23	1.46	83	110	31	18	1	18
050504	2	75	159	65	4		1														6	3	131	79	13.8	1.79	4.3	2.06	1.38	85	110	35	18	1	17
050505	1	81	170	73	1	1															6	3	138	85	5.5	1.08	4.6	2.08	1.61	83	120	35	18	1	17
050506	2	61	169	75																	6	3	129	80	4.8	1.35	6.6	3.27	1.64	81	120	35	17	1	18
050507	2	64	164	70	1	1															6	3	131	82	6.3	2.66	6.3	3.39	1.5	82	110	31	17	1	17
050508	2	76	160	64																	6	3	131	81	6.3	1.44	6.1	3.24	1.53	84	110	32	17	1	18
050509	2	67	159	66	1	1															6	3	131	77	5.7	4.79	5.8	2.7	1.54	86	120	33	18	1	18
050510	2	65	160	63	1	1															6	3	138	70	5.8	1.88	5.7	2.07	0.92	78	100	30	17	1	17
050511	2	79	156	75																	6	3	131	82	5.5	1.55	5.6	1.61	1.66	85	120	33	18	1	19
050512	2	61	165	65																	6	3	130	80	5.7	0.26	5.1	1.79	2.72	80	110	30	17	1	17
050513	2	70	163	67																	6	3	131	83	4.8	1.47	5.8	2.93	1.75	82	100	30	16	1	17
050514	2	63	161	67	1	1															6	3	130	82	5.5	1.59	4.5	1.77	1.66	85	110	32	18	1	17
050515	2	66	161	67	1	1	1		4		1										6	3	131	82	6.2	6.21	5.4	1.76	1.24	85	115	30	18	1	17
050517	2	77	159	65																	6	3	132	70	4.2	1.24	5	1.19	2.16	80	100	28	15	1	15
050518	2	67	160	70																	6	3	130	81	5.5	0.9	5.4	2.88	1.42	80	100	30	16	1	17
050519	2	67	161	62																	6	3	130	80	5	3.13	5.7	2.63	1.54	85	100	30	21	15	19
050520	1	69	172	68																	6	3	130	80	6	0.85	3.3	2.3	1.52	82	97	32	20	14	25
050521	1	66	172	82	1	1															3	1	140	90	5.6	2.33	5.5	3.32	1.3	88	103	35	25	16	30
050522	1	60	165	60																	5	1	140	80	5.9	1.36	4.7	2.32	1.68	75	95	31	25	14	28
050523	2	62	164	71																	6	1	130	80	5.6	2.17	6.9	3.56	1.78	80	100	31	21	15	28
050524	2	84	156	60																	6	3	130	80	5.9	3.15	5.7	2.9	1.55	80	100	30	15	17	32
050525	2	79	160	60	1	1															6	3	150	90	5.3	1.36	5	2.43	1.54	85	100	34	23	16	31
050526	2	70	162	82	1	1															6	3	150	90	8.1	1.56	5.1	2.65	1.56	100	120	38	28	19	38
050527	1	65	172	75	4		0														6	3	140	90	6.9	1.42	4	1.89	1.04	90	105	37	25	15	32
050528	2	57	150	68																	6	3	130	80	7	6.78	6.6	3.1	1.74	95	110	35	25	18	35
050529	2	52	160	58																	6	3	130	80	5.7	1.11	5	2.36	1.47	85	102	32	22	16	30
050530	2	63	164	68																	6	3	130	70	5.3	1.43	5.8	2.76	1.56	85	110	35	17	1	18
050531	2	65	170	71																	6	3	131	75	4.6	1.73	5.7	2.78	1.28	82	110	35	19	1	18
050532	2	75	159	65																	4	1	130	74	5.5	1.82	5.3	2.5	1.63	86	110	31	17	18	28
050533	2	65	163	72																	6	3	130	90	5	1.2	5.8	2.47	2.08	90	105	32	21	18	35
050534	1	64	170	68																	6	3	130	80	10	3.8	5.6	3.01	1.11	85	100	35	24	14	30
050535	2	61	162	68	1	1															6	3	160	90	7.6	4.15	6.3	3.44	1.48	85	102	33	21	16	30
050536	2	74	160	58																	6	3	130	80	6.7	1.21	5.8	2.8	2.03	80	95	30	20	15	23
050537	2	78	164	60	1	1	1		4		1		5								6	3	150	90	7.1	2.93	6.9	3.33	1.3	88	103	33	24	17	38
050538	1	78	172	82																	6	3	130	90	6.4	3.2	4.3	1.68	1.3	94	108	38	24	15	30
050539	2	71	160	64																	6	3	130	80	5.1	1.25	5.5	2.6	1.49	86	102	32	21	16	30
050540	1	64	172	70																	4	1	130	80	6.4	0.77	4.2	1.79	1.47	85	100	31	20	14	31
050601	2	72	160	65	1	1			2												6	3	150	90	4.6	1.31	5.3	2.66	1.3	80	90	33	16	23	14
050602	2	63	160	59																	6	3	130	75	5.9	1.42	4	1.8	1.11	73	93	34	17	23	14
050603	2	64	163	55	2																6	3	139	73	4.3	1.52	4.9	2.18	1.52	97	103	40	16	24	22
050604	1	64	177	74	4		1														6	1	130	80	6.4	1.52	4.6	2.16	1.24	88	96	38	21	21	23
050605	1	74	161	60	1	1			2				6								6	1	140	90	5	2.01	4.8	2.55	1.01	93	100	42	17	21	20
050606	2	70	158	58	2				6												6	1	120	80	7.6	2.39	6.7	3.62	1.33	88	96	40	17	22	20
050607	2	61	163	65	5																6	3	120	71	5	1.92	5.3	2.69	1.2	91	98	37	18	32	20
050608	2	49	169	70	1	1															6	3	145	90	6.1	1.24	4.7	2.33	1.05	80	90	39	17	30	24
050609	1	59	170	72	1	1	1		4		1		5								5	3	150	75	7	2.64	5	2.12	1.26	92	99	40	18	21	19
050610	2	54	168	73.5																	6	3	120	80	5	1.14	5	2.09	1.88	99	103	40	17	35	26
050611	1	82	172	80	2				3												2	1	140	90	5.1	1.88	5.1	2.29	1.46	96	104	44	19	35	20
050612	2	59	152	58																	6	3	120	80	5.2	1.4	5.6	2.53	1.69	86	94	40	17	22	20
050613	2	92	155	50																	6	3	120	70	4.4	1.08	3.7	1.51	1.2	80	86	38	16	20	22
050614	2	52	165	73																	6	3	120	80	4.5	2.92	5.5	2.88	1.06	89	94	42	20	24	26
050615	1	52	173	68																	6	3	130	80	4.5	1.93	4.7	2.16	1.32	89	94	40	24	25	27
050616	2	66	158	65																	6	3	120	80	5.9	1.59	5.4	2.45	1.48	87	94	40	19	20	20
050617	1	65	150	65	1	1															6	3	140	90	4.4	1.7	5.7	2.83	1.47	97	108	40	19	39	20
050618	2	62	158	62	1	1															6	3	130	90	5.3	6.59	6.6	2.83	1.48	93	109	36	16	30	20
050619	2	60	157	60	1	1															6	3	140	80	5.2	1.88	7.2	4.05	1.33	93	107	37	17	20	20
050620	2	45	162	65	1	1															6	3	160	90	4.6	3	5.6	2.94	1.02	100	103	43	19	38	30
050621	1	41	170	75																	6	3	140	80	5.5	1.04	5	2.38	1.34	90	97	40	20	21	23
050622	2	78	160	68																	6	3	120	80	4.7	0.97	6.2	2.98	1.91	89	96	38	19	21	23
050623	1	54	174	75																	3	3	120	80	5.1	1.19	5.1	2.27	1.54	90	96	38	29	22	24
050624	2	70	160	62																	6	3	130	80	6.9	1.2	5.7	2.57	1.73	85	91	39	20	20	22
050625	2	63	150	55																	6	3	130	80	5	0.79	5.5	2.48	1.84	89	94	38	20	19	20
050626	2	69	162	64																	6	3	130	80	5.1	2.35	7	3.56	1.68	87	94	37	19	20	21
050627	2	58	160	60																	6	3	120	80	4.5	1	5.4	2.51	1.57	85	91	37	17	20	21
050628	2	44	163	54																	6	3	115	65	5	0.86	5.4	2.36	1.76	82	90	36	16	17	19
050629	2	32	165	50																	6	3	115	65	5.1	0.57	3.8	1.39	1.4	80	89	35	16	15	15
050630	2	55	163	65	1	1															6	3	140	90	5	2.27	6.6	3.39	1.49	88	97	39	20	25	23
050631	1	55	180	70																	6	3	140	85	5.9	1.58	5.2	2.36	1.12	89	95	39	22	20	21
050632	2	47	160	67																	6	1	120	80	5.8	2.74	5	2.31	1.21	87	97	39	20	24	25
050633	2	78	160	68	1	1	1		4		1										6	3	140	85	9	3.29	5.1	2.3	1.12	92	97	39	20	22	23
050634	2	62	164	60	1	1															6	3	130	80	5.8	1.72	4.2	1.58	1.4	87	94	39	20	20	20
050635	1	72	170	87																	5	3	135	75	7.7	0.95	4.5	1.81	1.5	89	97	40	21	24	25
050636	1	51	172	86	1	1															2	1	150	90	5.1	7.72	6.4	2.76	1.27	90	99	40	23	24	23
050637	2	60	165	55																	6	3	130	80	4.7	1.77	4.5	2.25	1.14	84	90	36	21	17	19
050638	1	41	178	75																	6	3	120	80	4.7	1.79	4.4	2.21	1.11	88	97	39	21	20	21
050639	2	56	163	53																	6	2	117	78	5.6	0.56	4.6	1.9	1.58	84	90	37	19	17	19
050640	1	55	170	70	4		1														6	1	140	85	7.3	9.82	5.4	2.23	1.51	87	95	39	24	24	25
050701	2	68	150	51																	6	3	126	74	5.4	1.79	5.9	3.15	1.35	80	90	34	16	18	21
050702	2	68	152	52.5	1	1															6	3	134	81	5.4	1.08	6.2	3.2	1.78	84	94	35	16	19	22
050703	2	53	156	61	1	1	1		4		1										6	3	128	75	5.5	3.31	5.8	3.02	1.23	80	100	36	17	18	18
050704	2	82	150	60	1	1															6	3	140	60	5.2	4.5	6	2.99	1.79	88	95	37	18	21	22
050705	2	50	162	52																	6	3	134	80	4.5	0.88	4.6	1.77	1.75	75	78	28	15	19	19
050706	2	47	164	58																	6	3	120	75	4.6	1.75	4.3	2.07	1.33	75	80	28	15	19	19
050707	2	75	155	55																	6	3	150	70	4.8	2.42	6	3.33	1.17	81	83	34	17	21	23
050708	2	54	160	56	1	1															6	3	131	84	4.7	1.72	5.7	2.54	1.94	80	93	31	14	19	20
050709	1	52	176	80	4		1														6	2	130	80	12.3	1.7	3.8	1.2	1.65	108	96	35	17	11	22
050710	1	53	175	75	1	1															6	1	130	80	5.5	2.16	5.4	2.62	1.57	105	108	36	16	19	26
050711	2	57	165	62																	6	3	125	78	4.5	1.44	4.7	2.18	1.21	108	106	38	17	22	25
050712	1	58	178	70																	6	1	133	79	4.6	1.87	5	2.24	1.41	110	104	37	16	22	25
050713	2	62	158	58																	6	3	126	75	5.3	1.17	4.2	1.98	1.16	106	106	39	16	22	25
050714	1	68	178	75																	6	2	136	79	4.9	2.11	4.5	2.21	1.04	108	102	39	17.5	22	25
050715	2	89	158	65																	6	3	128	74	5.4	1.65	5	2.79	1.19	108	110	38	17	22	25
050716	2	51	165	70																	6	3	133	78	4.1	1.53	5.3	2.25	1.68	108	106	37	16.5	23	25
050717	2	68	161	60																	6	3	127	75	6.3	2.73	5.7	2.62	1.18	106	104	37	15.5	20	24
050718	2	51	160	55																	6	3	120	70	4.2	1.51	4	1.85	1.04	102	95	36	16.2	20	23
050719	2	52	160	65																	6	2	130	74	4.7	0.87	4.2	1.92	1.23	110	108	37	17	23	27
050720	1	68	175	75																	6	1	133	75	4.5	1.21	4	1.79	1.14	101	98	35	16.2	17	23
050721	2	75	158	75	1	1															6	3	130	70	5.1	1.62	4.3	2.12	1.15	107	105	38	16.5	21	26
050722	1	78	170	60																	6	3	133	74	4.8	1.32	4.2	2.1	1.26	84	93	33	15	12	16
050723	2	70	160	60	4		1														4	3	127	78	5.4	2.25	4.7	2.42	1.1	105	104	37	16	23	24
050724	1	69	166	69	1	1															6	1	133	74	4.4	11.61	5.9	3.14	1.51	104	101	37	15.6	23	25
050725	1	79	167	70	1	1			3												6	2	138	84	4.9	0.91	4.8	2.3	1.54	88	95	38	20	32	14.3
050726	2	74	160	65	2																6	3	134	79	5	0.97	4.9	2.54	1.33	96	108	35	18	30	25
050727	2	52	160	62	1	1															6	3	135	70	5.7	2.55	5.4	2.7	1.18	85	105	37	20	40	30
050728	2	82	150	50																	6	3	130	66	5.6	2.36	3.89	2.66	2.78	75	80	32	18	25	27
050729	1	52	170	62																	3	1	126	63	5.3	1.21	4.2	1.86	1.25	85	90	36	22	37	30
050730	1	49	175	75	1	1															3	1	136	84	5.1	2.96	5.2	2.57	1.16	95	106	40	25	42	38
050731	2	48	164	63																	6	1	131	72	5	0.71	4.5	2.31	1.23	86	109	35	23	36	38
050732	2	55	160	55																	6	3	106	67	4.8	1.86	7.9	3.97	2.3	85	92	30	15	13	22
050733	2	62	160	57																	6	3	133	72	5.8	0.95	3.6	1.18	1.44	78	98	33	14	25	20
050734	2	71	160	65	1	1															6	3	139	87	5.1	2.62	6.1	2.66	1.49	85	90	35	17	36.4	30
050735	2	62	161	78																	6	3	134	81	5.6	1.57	5.16	2.26	2.1	90	101	35	18	38	14.5
050736	2	81	155	68																	6	3	130	79	5.1	1.64	4.69	2.31	1.23	87	100	37	22	40	43
050737	2	61	158	64																	6	3	137	82	5.4	0.89	4.07	2.67	2	90	110	30	24	42	39
050738	2	79	155	70																	6	3	134	79	4.5	1.39	3.6	1.03	1.71	85	90	33.1	16	26	23.3
050739	2	44	164	55																	6	3	121	75	5.1	1.48	5.1	2.37	1.62	75	96	34	15	21	23
050740	2	65	160	60																	6	3	122	77	5.3	2.93	7	3.34	1.7	74	81	30	15	20	22
050801	2	48	158	69	1	1															6	1	145	85	5.6	1.85	5.8	2.84	1.61	94	98	39	18	40	30
050803	1	44	168	69																	6	3	125	85	5	1.63	5.2	2.83	1.26	90	94	34	22	24	16
050804	2	64	165	58																	6	1	130	80	5	1.23	5.5	2.84	1.51	86	94	37	16	22	26
050805	1	65	175	78																	5	1	135	78	5.3	1.64	5.6	3.12	1.22	98	102	40	20	24	25
050806	2	65	158	62																	6	3	128	70	5.4	1.62	5.3	2.94	1.32	78	82	35	18	22	23
050807	2	50	160	63	1	1			2												6	1	142	85	4.8	1.63	6.2	2.84	1.2	85	97	35	17	23	25
050808	1	44	180	95	4		1														2	3	130	85	5.7	2.39	5	2.43	1.36	90	94	42	31	33	28
050809	2	60	162	70	1	1															6	3	170	100	6.06	2.69	5.4	2.62	1.07	85	98	36	18	23	16
050810	1	69	170	75	4		1														3	3	135	85	10.1	2.27	4.3	2.01	1.09	88	92	40	30	30	26
050811	2	44	158	61																	6	3	112	72	5	0.95	5.5	2.61	1.8	72	88	36	22	30	20
050812	1	82	164	50																	6	1	105	65	5.5	1.51	4.7	1.9	1.53	69	88	34	16	10	10
050813	1	66	165	65	2																6	1	95	60	4.3	1.63	5.2	2.17	1.2	85	96	34	18	20	12
050814	2	63	162	56	1	0															6	1	130	70	4.1	0.51	3.4	2.05	1.92	88	102	39	20	20	12
050815	2	77	154	60																	6	3	130	75	4.6	1.7	5.9	2.3	1.77	82	89	35	18	22	19
050816	2	69	160	50																	6	1	143	86	5.2	2.39	6.8	2.86	1.9	79	85	30	18	23	19
050817	2	73	156	53	1	1	1		4		1										6	3	160	80	5.3	1.82	5.3	3.1	1.32	86	90	36	18	22	23
050818	2	65	160	55	4		1														6	3	135	84	5.9	1.73	4.8	2.94	1.34	86	94	36	18	24	26
050819	1	35	175	75																	3	1	134	82	5.3	1.66	4.82	2.94	1.26	86	88	36	19	25	28
050820	1	75	165	72	1	1			2				3								6	1	136	85	5.4	1.92	5.8	3.31	1.1	101	103	41	22	26	27
050821	2	74	160	43	2				3												6	3	145	90	5.6	1.81	4.2	2.63	1.34	72	70	29	16	21	20
050822	1	59	178	70																	3	1	143	75	6.1	1.82	5.4	3.31	1.21	90	94	40	22	24	16
050823	1	61	176	85	3																5	2	134	78	5.4	1.35	5	2.94	1.32	88	92	38	20	24	26
050824	1	58	175	75																	4	1	132	75	5.1	1.66	4.83	2.91	1.32	87	89	38	19	25	27
050825	1	45	160	62																	6	3	135	80	4.8	1.45	4.85	2.76	1.18	85	97	35	18	23	25
050826	2	53	160	60																	6	3	126	75	4.8	1.49	4.82	2.86	1.23	84	89	38	20	25	26
050827	2	53	158	65																	6	3	126	66	5.2	1.58	5.2	2.45	1.39	85	96	36	18	22	26
050828	2	33	160	60																	6	1	129	78	4.6	1.64	4.93	2.65	1.27	82	95	36	18	21	23
050829	2	38	167	80																	6	3	120	75	4.3	1.44	4.95	2.63	1.26	76	85	33	16	19	23
050830	2	36	160	65																	6	1	105	68	4.1	1.05	4.3	2.16	1.35	73	82	34	17	20	16
050831	2	81	159	53																	6	3	150	76	7.2	2.39	5.2	2.6	1.06	90	100	35	12	23	16
050832	2	70	158	80	1	1															6	3	180	85	5.3	2.64	5.9	3.31	1.52	94	101	40	25	23	16
050833	2	72	150	43	1	0															6	1	130	60		2.05	6.26	4.39	1.31	76	63	16	21	23	23
050834	1	53	174	76																	4	1	130	80	5.1	1.02	4.8	2.14	1.17	110	112	50	25	27	28
050835	1	53	172	70																	6	1	130	80	4.9	2.01	6.2	2.07	1.68	99	102	40	20	24	25
050836	2	61	166	72	1	1															6	3	130	80	6	1.1	3.5	1.5	1.33	82	90	36	20	38	21
050837	1	83	167	73																	6	3	140	80	7	2.09	5.5	2.72	1.43	105	112	34	16	24	16
050838	2	54	162	62																	6	3	125	75	4.9	1.62	4.2	2.07	1.18	84	95	35	17	23	25
050839	2	37	160	55																	6	3	120	80	4.8	1.2	4.13	2.82	1.1	70	85	32	16	20	16
050840	1	36	182	83	1	1															6	1	110	80	3.9	1.83	4.6	2.82	1.4	85	88	38	19	25	16
050841	1	42	174	80	1	1															1	1	160	85	5.8	3.12	6.1	3.54	1.2	114	119	45	23	26	15
050842	1	79	169	62																	6	3	118	65	5.2	1.15	5	2.51	1.27	74	76	38	19	17	13
050843	2	77	160	59	2				6												6	3	142	85	5.3	2.9	6.7	3.73	1.52	95	108	40	21	18	12
050844	2	54	172	75	1	1															6	3	132	85	4.8	2.01	5.9	2.07	1.27	90	102	40	20	25	27
050901	2	54	160	55																	6	1	110	80	5.1	2.1	3.5	2	1.1	71	91	33	16	22	13
050902	1	65	168	75																	6	1	150	100	6.1	1.68	4.7	2.29	1.03	92.8	101	36	18	13	15
050903	2	36	160	43																	6	3	120	80	5.1	12.2	3.5	2.2	1.2	69	85	30	14	22	11
050904	2	62	158	65	1	0			2				4		0						6	3	165	90	7.5	1.8	3.3	2	1.12	83	93	33	17	23	14
050905	2	60	160	75	1	1															6	3	130	95	5.9	1.75	3.6	1.33	1.38	100	100	33	17	23	14
050906	1	61	177	78	2																5	1	120	80	5.2	1.7	3	2.1	1.7	88	110	34	18	23	15
050907	2	65	158	75	1	0															6	3	150	100	5.3	1.2	5.1	2.38	1.53	88	102	35	19	13	14
050908	2	60	156	65	4		1		1	0											6	3	150	80	8	2	2.8	2.1	1.55	93	101	34	17	23	14
050909	1	36	172	75																	6	1	120	80	5	1.71	3.4	2.01	1.1	90	110	35	18	25	15
050910	1	62	173	83.5	1	0			2				4		0						4	1	160	100	7.3	0.74	5.53	2.1	1.7	102	118	36	19	28	17
050911	2	55	168	66	1	0															6	1	120	80	5.8	1.8	3.3	1.75	1.85	81	102	33	17	23	14
050912	1	58	172	56																	6	1	125	80	6.5	1.81	3.45	2.2	1.16	75	94	33	17	21	13
050913	2	56	160	55																	6	1	130	80	5.8	1.1	4.1	1.2	2	72	92.4	33	17	21	12
050914	2	47	160	75	4		0														6	3	118	68	10	1.56	3.2	2.17	1.55	92	106	35	16	36	22
050915	2	54	165	72																	6	1	110	60	4	1.2	3.2	1.15	1.68	93	110	30	20	38	24
050916	1	67	183	88																	4	1	120	80	4.8	1.25	3.2	1.17	1.72	113	140	60	25	38	23
050917	2	52	160	45																	6	3	100	60	51	1.1	2	2.1	1.45	70	88	30	14	20	11
050918	1	60	170	75	1	1															3	1	190	108	4.9	1.52	6.4	3.26	1.44	100	120	34	17	23	14
050919	1	68	174	64	1	1															5	1	160	90	6.8	0.57	5.9	3.25	2.25	75	98	34	17	23	14
050920	2	68	157	55																	6	3	100	55	4.8	1.7	3.4	2.1	1.35	72	92	33	16	23	13
050921	2	55	150	65																	6	3	140	90	4.4	1.22	6.2	3.06	1.75	90.4	106	35	18	13	14
050922	2	68	168	60																	6	3	130	80	5.9	2.17	4.8	2.19	1.17	90	110	33	15	22	14
050923	1	57	172	75	4		1														6	1	150	100	12.7	3.1	3.1	1.14	0.99	92.8	105	36	21	16	15
050924	2	73	158	64																	6	3	150	70	8.5	1.21	4.8	2.19	1.18	91	98	32	16	23	15
050925	1	70	170	70																	6	3	120	80	4.7	3.41	4.8	2.13	1.11	87	98	40	18	22	12
050926	2	66	160	55																	6	1	120	80	6.1	1.08	4.8	2.18	1.42	79	90	34	17	23	14
050927	2	63	158	42																	6	3	100	70	5.1	1.51	5.2	1.25	1.8	69	88	30	14	20	11
050928	1	59	175	73																	6	1	120	80	5.9	1.06	5.3	2.82	1.12	85	96	38	17	21	12
050929	2	66	167	61.5																	6	3	120	85	4.8	2	2.5	2.2	1.7	88	97	32	15	21	14
050930	2	72	158	125	1	1			4		0										6	3	180	100	10	2.02	4.39	2.2	1.33	86	95	38	17	22	11
050931	2	67	160	61																	6	3	120	80	5.1	4.14	3.5	2.4	1.3	66.6	101	34	17	24	15
050932	2	68	162	54	1	1	1		4		1										6	3	120	85	7.7	2	3.4	2.1	1.1	76	90	32	16	20	15
050933	2	67	156	70	1	1															6	3	110	70	5.7	1.8	2.7	2	1.34	95	100	36	16	31	12
050934	1	70	174	75	5																5	2	130	80	5.1	1.7	3.4	2.39	1.34	85	93	35	15	21	12
050935	1	69	165	140	1	1															5	1	150	90	5.52	2.01	4.39	2.39	1.34	86.6	94	40	18	20	10
050936	2	64	159	70																	6	3	100	80	5.1	5.8	3.4	2.2	1.2	72	94	32	17	23	14
050937	2	69	158	50																	6	3	125	80	5.3	1.7	3.6	2.1	1.5	73	98	33	15	23	14
050938	2	68	162	62	1	1															6	3	140	80	4.6	1.55	6.53	1.78	1.58	86	95	33	16	32	20
050939	1	70	170	75																	6	3	120	80	5.1	1.7	3.2	2	1.57	87	99	38	18	21	12
050940	2	72	160	65																	6	3	150	90	5.9	0.8	5.4	2.8	1.26	75	92	32	15	21	12
050941	2	74	151	46																	6	3	135	80	4.91	1.17	6.18	2.98	2.95	74	88	30	15	17	9
050942	2	64	162	66																	6	3	170	104	5.1	1.27	3.5	2.18	1.51	85	101	34	19	24	14
050943	2	69	158	65																	6	3	120	80	5.3	1.65	3.45	2.14	1.24	73	94	34	17	24	14
050944	2	62	158	56	1	1															6	3	140	80	5.1	1.2	3.5	2.2	1.31	83	94	32	16	23	14
050945	2	43	162	50																	6	3	120	80	4.5	0.98	5.5	2.02	2.28	70	90	32	14	21	12
050946	2	35	160	52																	6	3	90	60	5.21	0.81	5.7	2.57	1.74	71	93	32	15	21	12
050947	1	70	169	65	1	1			2				4		1						5	1	160	80	7.5	1.38	3.6	1.79	0.99	88	93	38	7.5	50	20
050948	2	67	160	65	1	1			2				3				4		1		6	3	150	90	6.1	2.48	6.1	2.95	1.58	86	100	34	6	48	18
050949	2	42	156	66																	6	3	90	60	4.8	1.7	5.7	2.51	1.99	84	97	33	15.5	32	25
051001	2	33	171	56																	6	1	110	75	4.1	1.61	4.2	2.25	1.19	74	91	34	16	16	18
051002	1	60	176	80	1	1	1		4		1										6	1	160	95	8	1.71	4.7	1.19	2.53	88	100	40	22	26	24
051003	1	33	178	60																	6	3	120	70	5.1	1.3	5.3	2.1	1.7	90	86	35	19	11	7
051004	2	60	162	60																	6	3	115	65	4.1	1.8	6	2.53	1.19	83	98	35	16	22	20
051005	2	60	158	60																	6	3	105	70	4.8	1.42	4.9	2.55	1.09	90	97	37	16	30	20
051006	1	64	165	57.5																	6	1	90	60	4.7	1.15	4.9	2.36	1.25	80	90	33.5	18	20	15
051007	2	65	158	55																	6	3	130	80	4.5	1.71	4.7	2.53	1.19	84	90	37	20	25	22
051008	2	68	159	56																	6	3	110	70	4.5	1.67	4.7	2.53	1.19	87	100	39	17	28	25
051009	1	68	160	65																	6	3	115	75	4.7	1.8	4.7	2.53	1.19	87	100	40	21	20	18
051010	2	62	163	69																	6	3	120	80	4.5	1.7	4.6	2.45	1.19	89	99	36	17	20	18
051011	1	62	175	62																	5	3	120	70	4.4	1.72	4.7	2.53	1.19	78	87	39	20	20	16
051012	2	52	158	51																	6	3	120	80	4.5	1.81	4.7	1.2	2.53	73	78	33	17	22	15
051013	2	51	164	65																	6	3	120	70	5	2.94	6.4	3.4	1.36	80	95	36	21	25	21
051014	1	55	170	75																	6	1	120	70	4.1	2.25	4.7	2.53	1.19	90	100	35	20	28	26
051015	2	54	162	67	1	1															6	3	130	80	4.6	1.13	4.2	1.72	1.55	89	100	32	16	28	26
051016	2	62	160	60																	6	3	130	70	4.9	1.55	5.4	2.74	1.25	80	90	30	16	24	22
051017	1	66	175	80																	6	1	140	80	5	0.96	5.1	2.86	1.27	100	110	35	20	30	26
051018	2	34	160	42																	6	3	110	70	4.7	4.3	1.01	2.4	1.1	67	87	31	16	18	15
051019	2	52	158	45																	6	3	90	60	4.8	1.71	4.7	2.41	1.19	67	85	30	15	20	17
051020	2	60	160	60																	6	3	120	70	5.1	1.5	5.8	2.2	1.5	82	100	35	16	20	18
060101	2	41	162	62																	6	3	132	78	8.89	1.2	3.7	0.91	1.11	80	91	32	15	20	18
060102	1	53	174	75	4		1														4	1	140	80	9.52	1.8	6	2.4	1.87	90	101	34	18	18	21
060103	2	39	163	59																	6	3	120	70	4.8	1.5	4.2	1.5	1.66	80	89	34	15.12	21	19
060104	1	70	168	70	3																6	1	130	90	4.99	1.7	4.4	1.81	1.22	85	100	34	16	21	20
060105	1	42	168	65																	6	1	120	70	4.9	1.4	5.2	2.17	1.2	83	95	32	16	18	20
060106	1	46	168	65																	6	3	120	80	5.15	1.2	5	2.06	1.43	85	101	35	17	22	20
060107	2	27	161	56																	6	3	105	65	4.13	1.5	4.6	1.49	1.78	80	92	31	15	18	20
060108	2	52	157	65	4		0														6	3	125	78	7.25	1.7	5.6	2.3	1.36	87	102	36	17	23	20
060109	2	43	162	65																	6	3	110	70	5.8	0.8	4.9	1.38	2.36	76	82	35	15	21	19
060110	1	45	172	75																	3	1	120	80	11.85	3.4	5.3	2.62	1.26	80	78	38	20	21	20
060111	2	46	160	74.6																	6	1	135	85	5.91	3.5	5.3	2.5	1.35	90	105	36	18	23	20
060112	2	21	164	54																	6	3	120	70	5.26	1.3	3.3	1.21	1.2	75	86	32	15	15	16
060113	1	45	170	70																	6	3	110	70	5.35	1.8	5.7	2.4	1.49	85	95	37	17	21	20
060114	1	67	158	71																	6	3	135	75	5.22	1.5	6.3	2.62	1.59	90	104	35.5	18	22	20
060115	1	72	170	65																	3	3	121	72	5.9	3	5.6	2.71	0.98	91	98	40	18	18	21
060116	2	45	160	60																	6	3	121	76	6.58	0.9	4.2	1.5	1.2	83	95.5	36	16.5	22	20
060117	1	57	165	68	1	1															6	1	145	90	5.6	1.2	5.4	2.07	1.44	87	101	41	17.5	22	20
060118	1	47	180	80																	3	1	125	75	5.32	3.4	4.7	2.21	0.99	100	110	35	18	32	24
060119	2	76	165	60	1	1			3												4	3	135	80	5.68	2.4	6.2	2.69	1.49	81	93	35	16	17	15
060120	2	53	155	60	1	1															6	1	135	74	4.76	2.1	5	2.11	1.36	92	100	36	17	14	22
060121	1	54	172	68	1	1			2				4		1						2	1	130	81	7.76	4.7	4.7	1.9	1.46	91	99	39	18	2	10
060122	1	28	175	73																	6	1	128	73	5.25	1.6	4.9	1.89	1.33	90	93	39	17.5	10	10
060123	1	52	166	80	1	1															6	1	148	87	5.73	3.2	3.7	1.36	1.26	102.5	103	40	19	12	20
060124	2	52	155	62																	6	3	124	78	5.13	2.1	6.1	2.63	1.59	85.5	98	35	16.5	6	20
060125	1	51	170	70																	3	1	137	74	5.1	2.8	5	2.18	1.17	90	97	38	16	35	30
060126	2	59	164	68																	6	1	138	76	4.44	4.4	8.5	4.44	1.78	93	98	35	15	37	28
060127	1	59	178	85																	6	1	127	85	6.15	2.5	5.9	2.39	1.44	100	106	40	17.5	40	29
060128	2	48	155	56																	6	3	126	85	5.08	2.4	6.8	2.78	2.22	86	95	33	14.5	35	20
060129	2	27	162	45																	6	3	110	70	5.04	1.4	5	1.93	1.62	64	85	30	14	5	5
060130	1	52	180	75																	6	1	121	78	5.33	1.4	5.2	2.15	1.23	89	88	43	19	6	4
060131	2	51	164	59	1	1			2												6	3	130	80	4.82	2.2	7	3.02	1.82	78	84	38	21	8	6
060132	2	61	160	65	1	1			2												6	3	122	72	4.62	1.3	6.8	2.96	1.61	85	88	39	21	8	6
060133	1	27	180	55																	6	1	112	71	4.96	1.3	4.3	1.26	2.12	78	80	37	18	8	8
060134	1	52	172	63																	6	1	128	79	5.34	3.3	6	2.91	1.19	90	115	41	20	19	20
060135	2	42	160	57.5																	6	3	120	60	5.36	2.3	7.1	3.32	1.42	98	85	28	13	18	20
060136	2	52	158	60	4		1														6	3	132	78	8.24	0.8	3.1	0.99	1.07	84	96	35	16	20	22
060137	2	65	165	78	2		1		4		1										6	1	129	78	8.76	2.6	4.4	1.77	1.37	99	30	36	17	21	19
060138	1	68	177	76	1	1															3	1	110	70	5.79	2	5	2.27	1.13	90	30	38	16	18	20
060139	1	37	175	91																	2	1	148	108	5.44	4.9	6.9	3.19	1.66	106	33	43	19	23	20
060140	2	36	164	67																	6	1	100	70	5.37	1.4	4.6	1.96	1.23	82	96	33	16	20	18
060201	2	53	160	60																	6	1	110	75	5.29	1.5	5.4	2.08	1.67	70	88	34	17	21	22
060202	2	58	165	53																	6	1	120	80	7.95	2.3	6.2	2.55	1.7	70	92	30	15	25	10
060203	2	59	164	62																	6	1	120	80	6.22	2.4	4.4	1.81	1.21	80	95.5	34	16.5	19	18
060204	2	57	162	53																	6	3	130	80	5.81	3.9	5.1	2.5	1.17	75	90	28	17	20	25
060205	2	60	162	59																	6	1	120	80	5.49	2.5	4.8	2.2	1.13	78	96	34.5	17	21	20
060206	1	61	176	75																	6	1	135	85	5.88	1.5	5.8	2.54	1.36	93	100	38	18	20	21
060207	2	59	156	70																	6	3	130	85	6.35	4.5	5.8	2.73	1.5	97	107	36	16.5	23	20
060208	2	57	160	62																	6	3	120	80	5.8	2.6	6.2	2.94	1.14	98	103	34.5	17	30	30
060209	2	57	165	65																	6	1	120	80	5.62	2.1	6.3	2.82	1.35	83.5	99	34	17	25	15
060210	2	58	158	67	4		1														6	1	120	70	14.82	2.3	5.7	2.34	1.39	80	100	25	16	20	25
060211	1	59	175	78	1	0															2	1	130	80	5.04	1.23	5.1	2.05	1.15	90	115	27	17	25	30
060212	2	57	160	60																	6	1	120	80	5.98	1.6	7.7	3.42	1.54	88	99	34.5	16	18	22
060213	1	57	172	72	1	1															6	1	130	90	6.37	3.4	3.8	1.76	0.91	100	105	40.5	20	23	26
060214	2	57	160	54																	6	1	120	70	6.52	2.3	7.6	3.48	1.51	82.5	94	33.5	16	20	20
060215	2	58	162	64																	6	1	120	80	5.47	1.6	4.6	1.71	1.52	76.7	100	37	19	24	30
060216	2	57	162	57	1	1	1		4		1										6	1	120	70	7.15	1.4	4.9	2.01	1.38	80	96	34.7	18	24	30
060217	2	60	164	61	1	1															6	3	120	80	6.12	1.8	5.2	1.85	1.87	83	95	33.5	17	20	25
060218	2	61	172	100	1	1															6	1	150	100	6.4	2.8	6	2.72	1.47	160	150	40.5	25	35	35
060219	2	64	162	55																	6	3	117	67	6.7	2.69	6.15	4.45	1.12	87	95	36.5	17.5	22	19
060220	2	55	165	74	1	1															6	3	120	80	5.97	1.8	6	3.02	1.29	80	95	33	16	21	20
060221	2	51	163	45																	6	3	125	75	5.07	1.8	4.6	1.73	1.74	78	95	38	19.5	28	26
060222	2	76	155	43																	6	3	118	68	4.61	1.4	5.5	2.24	1.72	78	89	37	18	27	26
060223	2	44	164	70																	4	1	127	76	4.17	1.8	5	2.1	1.29	85	100	34	15	34	30
060224	1	80	170	66																	5	1	130	82	5.03	1.2	4.8	1.89	1.22	96	92	36	16	28	27
060225	2	80	160	62	2																6	3	110	70	4.17	1.7	6.7	2.67	1.88	82	96	35	16	30	28
060226	2	46	160	82	1	1															6	3	140	85	4.76	2	6.1	2.74	1.42	90	107	36	17	34	30
060227	1	54	170	64																	6	3	124	60	4.62	2.1	4.8	2.22	0.94	78	100	32	15	30	28
060228	2	53	160	74																	6	3	113	71	4.95	2.3	4.5	2.1	1.21	82	102	34	16	34	30
060229	1	44	163	67																	3	1	130	75	8.86	1.7	5.4	1.59	2.4	76	94	32	15	29	27
060230	2	58	165	65																	6	1	120	80	5.78	1.9	5.4	2.03	1.91	89	99	37	17	20	27
060231	2	56	155	65	1	1			2												6	3	120	70	6.01	2.8	4.3	1.55	1.57	80	100	33.5	16	34	31
060232	1	56	164	64	4		1														5	1	120	80	5.57	1.9	4.3	1.72	1.04	96	91	37	17	28	26
060233	2	36	160	60																	6	3	120	80	5.17	1.4	5.4	2.17	1.69	85	100	30	12	34	32
060234	2	63	160	60	1	1	1		4		1										6	3	150	90	6.2	1.8	7.2	3.8	1.41	85	100	30	12	34	30
060235	2	59	162	60																	6	3	110	70	4.99	1.9	4.3	1.63	1.28	72	95	30	12	30	27
060236	2	60	160	58																	6	3	130	80	6.1	1.4	6.8	2.86	1.85	82	94	30	10	30	28
060237	2	66	160	65	1	0															6	3	150	90	6.25	3.5	6.5	3.11	1.4	85	100	30	12	34	32
060238	2	60	163	73																	6	3	150	90	6.37	2.3	7.4	3.48	1.63	95	110	30	13	36	34
060239	1	52	163	70	1	1			2				4		1						2	3	120	72	11.4	8.3	7.4	4.41	1.61
060240	1	59	172	75																	4	1	125	76	6.34	3.9	5.1	2.46	1.14	93	100	35	17	19	20
060301	1	47	178	80	4		0														6	1	130	70	7.79	3.3	5.5	1.51	2.61	99.5	108	40	20	36	38
060302	1	60	175	80	4		1														2	1	125	80	7.2	5.5	6.5	3.4	1.49	93	110	25	14	35	39
060303	1	70	180	70																	6	3	110	65	5.4	2.5	5	1	1.45	86	118	23	13	35	31
060304	1	75	170	70																	6	3	127	75	5.16	1	4.5	1.59	1.61	88	90	30	17.5	30	31
060305	2	61	158	55																	3	3	122	90	6	1.5	5	1.63	1.7	76	100	25	12	28	28
060306	2	60	160	60																	6	3	110	65	5.4	1.5	5	2	1.64	76	100	24	14	30	28
060307	1	65	168	74																	6	3	131	73	5.39	2	4.7	2.02	1.06	93.5	95	30	14	31	30
060308	1	42	178	78.7																	2	1	132	82	5.62	6.5	4.1	2.22	0.9	103.5	111	42	20.7	33	31
060309	2	67	162	72																	6	3	132	86	4.95	3.1	6.6	3.15	1.28	77	91	3	15	30	32
060310	2	68	158	55																	6	3	129	81	5.59	4.1	7.7	4.1	1.49	76	95	30	14.5	30	28
060311	2	63	158	70																	6	1	120	65	4.6	1.8	5.7	2.38	1.66	76	90	29	12	27	28
060312	2	66	164	75																	6	3	130	75	5.57	2.7	5.3	2.58	1.24	83	110	40	19	32	29
060313	2	30	155	65																	6	3	114	82	5.56	6.1	6.5	3.3	1.62	74	84	32	16	32	28
060314	1	62	168	64	4		1														4	1	132	86	12.9	2.5	5.6	2.36	1.31	79	92	38	18	33	31
060315	2	37	158	63																	6	3	122	70	5.68	1	3.9	1.3	1.49	76	96	35	17	31	28
060316	2	35	156	54																	6	3	110	70	4.53	0.8	5.1	1.95	1.7	81	90	32.5	16	18	13
060317	2	41	162	56																	6	3	110	80	5.25	2.2	4.8	2.14	1.08	84.5	99	32.5	15	19	19
060318	1	76	164	45	3																3	1	100	60	5.38	1.4	6.1	2.56	1.59	72	85	33	16	24	23
060319	2	71	155	57	1	1			2				3				4		1		6	3	150	80	7.13	2.2	5.2	2.17	1.23	83	95	32	17	33	31
060320	2	33	169	50																	6	1	100	60	4.53	0.5	4.2	1.42	1.68	64	88	31	14	13	10
060321	2	56	162	55																	6	3	110	70	4.46	1.1	5	1.9	1.7	77.5	89.5	32	16	11	11
060322	2	36	165	59																	6	3	110	80	5.5	1.3	3.7	1.16	1.3	79	92	32	15	18	16
060323	2	66	150	50																	6	3	120	80	5.24	1.9	6.7	2.97	1.5	82	95	35	18	22	20
060324	1	66	174	76																	3	1	120	80	5.9	1.6	5	2.02	1.04	96	116	32	30	28	26
060325	1	57	173	70																	1	1	110	80	6.18	1.7	5.1	2.26	1.27	90	110	35	20	23	20
060326	1	80	163	61	1	1			8			0									5	2	145	70	5.42	2.4	7	3.23	1.24	88	95	39	16.5	10	11
060327	1	41	166	85																	3	1	120	80	5.69	4.9	6.1	3.14	1.36	99.5	108	40	19.5	36	38
060328	2	60	160	60																	4	3	130	80	6.49	2.9	5.5	2.6	0.92	78	88	32	16	20	18
060329	1	65	167	70																	6	3	120	80	5.97	2.5	5.9	2.76	1.13	83	93	34	17	24	22
060330	2	37	165	60																	6	3	120	80	5.66	0.7	5.2	1.93	1.67	81	99	34	17.5	22	16
060331	2	44	155	68																	6	1	110	75	5.98	1.2	5	2.05	1.13	87	103	35	17	36	22
060332	2	41	160	68																	6	1	130	70	5.13	1.7	5.7	2.27	1.42	87.5	98	35.5	16.5	21	20
060333	1	44	168	87.5																	6	1	130	80	5.97	1.4	4.9	1.88	1.52	104	108	41	18	30	31
060334	2	60	160	57.2																	6	3	125	75	5.1	2.3	7.2	3.37	1.69	76	90	3	15	30	30
060335	2	52	164	60																	6	3	120	82	4.91	1.4	5.1	2.27	1.42	70	85	28	15	18	17
060336	2	44	155	55																	6	3	110	70	5.32	1.5	4.8	2.05	1.21	79	85	33	16	18	16
060337	1	52	165	67	1	1			2				4		1						6	3	110	80	8.72	3.1	4.4	1.92	1.06	98	101	39	17	28	24
060338	2	60	163	53																	6	3	100	60	4.84	2.8	5.2	2.32	1.19	73	88	30	15	18	15
060339	2	72	160	65	1	1															6	3	130	80	5.37	1.5	5.2	2.02	1.69	83	95	25	16	25	21
060340	2	68	155	80	1	1			2												6	1	140	86	7.54	2	5	1.86	1.89	100	130	42.5	17	32	31
060401	1	59	176	90	1	1															5	1	130	90	6.15	2.5	6.2	2.8	1.42	104	121	41	73	51	42
060402	2	58	164	60	1	1			4		0										6	3	120	80	6.75	1.8	6.2	2.57	1.43	82	91	32	6.5	21	20
060403	1	62	163	70																	6	3	130	80	5.97	1.4	3.9	1.34	1.54	89	97	36	6.9	24	22
060404	2	61	158	70	1	1															6	3	140	80	5.46	3.2	6.1	2.78	1.47	90	97	34	6.7	26	23
060405	1	52	163	63																	6	1	120	80	5.51	2.8	5	1.95	1.38
060406	2	61	160	73																	6	3	130	85	4.82	2.3	4.5	1.97	1.11
060407	1	59	176	70																	6	1	130	80	5.68	1.3	6.1	2.76	1.13	83	96	32	6.6	27	24
060408	1	38	172	60																	6	1	120	80	5.72	1.4	5.4	2.24	1.26	83	96	30	6.4	24	22
060409	2	67	162	60	1	0			4		0										6	3	130	70	6.66	1	5.4	2.14	1.5	80	89	30	6.1	22	20
060410	2	61	156	55	1	1															6	3	120	80	5.5	2.7	6.6	2.4	2.54	84	99	34	6.6	23	22
060411	2	62	160	55	1	1															6	1	120	70	6.1	3.4	5.8	2.78	1.31	82	90	32	6.4	21	20
060412	2	42	160	80																	6	3	110	60	5.46	1.9	4.1	1.22	1.57	80	88	30	6.2	20	19
060413	2	59	155	55																	6	3	120	80	5.66	2	6.1	2.6	1.45	75	82	27	5.8	18	16
060414	1	64	170	55																	6	3	120	80	4.78	0.9	5.7	2.02	2.27	85	92	23	6	19	17
060415	2	56	155	65																	6	3	120	70	6.45	2.8	5.5	1.31	2.42	95	106	32	6.1	23	21
060416	2	58	162	70	1	1			2				4		1						6	3	140	90	13.15	1.4	5.7	2.57	1.38	94	101	27	5.9	24	21
060417	2	51	162	65																	6	3	130	80	5.16	2.4	7.2	3.43	1.4	85	97	30	6	22	30
060418	1	51	172	85																	5	3	130	85	5.71	4.3	5.6	2.55	0.98	110	126	35	6.4	27	24
060419	2	60	162	45																	6	3	130	80	5.39	1.4	7.3	3.01	2.05	69	76	21	4.1	19	17
060420	2	65	150	49																	6	2	130	70	10.84	2.8	5.3	2.25	1.32	77	89	34	15	12	10
060421	1	69	165	68																	5	2	130	85	5.47	1.5	5.8	2.63	1.23	89	100	39	18	21	17
060422	2	57	162	45	4		1														6	3	130	80	13.04	2.1	5.4	2.04	2	80	86	27	16	22	20
060423	1	59	170	75																	6	1	130	80	7.4	3.7	5.4	2.34	1.26	95	107	34	22	31	27
060424	2	47	160	70																	6	3	110	70	5.54	1.9	5.1	2.14	1.33	82	96	37	25	24	21
060425	1	55	167	70																	6	3	110	70	24.53	3	5	2.19	1.25	92	101	32	27	22	19
060426	1	52	170	75																	3	1	120	85	5.54	2	3.9	1.54	1.02	95	105	34	27	24	21
060427	2	50	162	60																	6	3	100	60	5.84	4.4	4.2	1.85	1.09	75	86	27	21	19	19
060428	2	46	140	48																	6	3	110	70	5.15	1.8	5.2	2.14	1.36	80	91	32	14	22	19
060429	2	41	163	64																	6	3	110	70	5.68	1.9	4.8	1.86	1.63	83	94	32	19	22	19
060430	2	43	160	55	6																6	3	100	60	5.85	1.3	5.3	1.98	1.96	77	90	24	19	17	12
060431	2	36	170	75																	6	3	120	70	5.34	1.3	4.1	1.6	1.2	85	105	27	22	19	17
060432	2	39	162	47																	6	3	100	70	4.57	1.5	5	1.85	1.87	85	95	31	24	22	19
060433	2	24	160	65																	6	3	110	70	5.46	1.5	5	1.87	1.74	76	90	29	21	19	14
060434	2	35	153	63																	6	1	120	70	5.5	1.9	3.9	1.51	1.28	76	94	30	22	19	17
060435	1	51	165	75																	6	3	120	80	5.34	2.6	4.8	2.18	1.02	85	104	33	30	29	22
060436	2	34	163	62																	6	3	110	70	4.7	1.7	3.1	1.15	1.09	75	86	31	17	20	17
060437	2	41	167	75																	6	3	120	70	5.42	1.4	4	1.63	1.14	80	93	32	19	22	19
060438	2	66	155	55																	6	3	110	70	5.25	1.7	5.1	2.09	1.3	70	81	29	16	20	17
060439	2	44	165	75																	6	3	130	85	6.04	2.5	4.9	2.64	1.11	82	104	33	20	22	19
060440	2	42	170	100																	6	3	145	96	7.3	2.8	5.5	2.53	1.19	111	140	45	24	31	27
070101	2	46	162	56																	6	1	110	70	4	0.77	6.58	2.56	2.04	87	96	40	17	28	30
070102	1	59	178	89	1	1			3												5	2	140	90	5.23	2.78	8.87	3.75	1.89	94	105	41	17	33	30
070103	2	59	159	55	1	1	1		4		1										6	3	140	80	9.16	6.97	7.21	1.94	1.3	77	85	25	20	27	30
070104	2	73	155	49																	6	3	125	80	5.15	2.4	8.47	2.23	2.02	87	90	25	20	25	30
070105	2	72	165	60	1	1			2												6	3	160	100	5.39	1.25	7	2.06	1.57	80	85	23	15	21	25
070106	1	73	169	68																	3	1	145	70	5.28	0.61	4.86	1.17	1.71	80	85	25	20	23	26
070107	2	59	155	60	1	1	1		4		1										6	1	150	85	10.9	0.79	3.7	1.98	1.36	89	92	36	17	32	41
070108	2	53	160	68																	4	3	120	80	5.21	1.15	2.4	1.18	2.15	95	102	33	16	29	22
070109	2	60	156	60	4		1														6	3	130	80	8.1	1.85	4.55	2.57	1	82	97	33	16	20	24
070110	2	57	160	65	4		1														6	3	120	80	16.42	2.29	5.68	1.95	1.61	87	96	38	18	29	30
070111	1	63	174	65																	3	2	130	80	4.66	1.85	7.06	2.72	1.54	87	89	33	16	30	31
070112	1	70	170	85	1	1			4		0										6	3	130	85	6.7	1.8	5.73	2.37	1.21	97	120	43	21	30	32
070113	2	69	160	60	1	0															6	3	125	90	5.67	1.5	6.07	2.78	1.49	80	100	35	15	21	25
070114	2	45	170	63																	6	3	120	80	4.5	0.69	4.65	1.47	1.98	73	97	35	15	21	25
070115	2	67	160	65	1	1															6	1	130	80	4.78	1.8	6.98	3.03	1.66	87	96	40	20	29	30
070116	2	59	157	68																	6	3	130	85	11.08	2.2	6.93	3.09	1.52	87	96	40	20	29	30
070117	1	72	165	75	1	1			2				3				4		1		5	1	130	80	7.85	2.29	6.78	2.95	1.28	97	105	43	19	30	31
070118	1	62	173	82	1	1															6	3	140	85	6	2.34	4.76	1.81	4.76	90	100	29	22	31	33
070119	2	62	166	62	1	1															6	3	145	90	5.5	1.43	6.88	2.51	2	84	89	25	20	27	30
070120	2	45	160	83																	6	3	125	70	5.29	0.85	5.37	2.71	1.69	100	102	41	15	31	34
070121	1	45	172	80	1	1															6	3	160	90	5.63	3.64	5.83	2.45	1.06	94	98	40	17	32	36
070122	2	46	158	60																	6	3	125	75	5.54	2.55	5.57	2.21	1.44	73	90	37	15	29	31
070123	1	65	172	80	1	0			4		0										6	3	140	90	9.35	0.96	4.05	1.52	1.27	90	95	25	19	27	29
070124	2	62	162	64																	6	3	125	80	4.93	1.74	5.28	2.2	1.43	84	89	22	15	25	30
070125	2	45	160	50																	6	3	135	80	5.02	1.43	5.17	2.3	1.57	77	80	25	15	21	26
070126	1	45	170	80																	6	3	125	80	5.64	4.95	5.27	1.75	1.33	90	100	27	20	29	30
070127	1	74	170	75	5																5	3	125	75	4.38	1.73	5.05	2.23	1.2	100	102	41	17	28	30
070128	2	73	155	68																	6	3	120	70	5.63	1.11	5.51	2.44	1.44	90	96	39	16	29	32
070129	1	58	170	75	4		1		3				8			1					4	2	130	70	7.15	0.82	3.65	1.27	1.34	80	85	30	18	32	30
070130	1	61	172	67	4		1														6	3	120	85	6.67	1.66	5.75	3.12	1.28	80	87	42	19	20	31
070131	2	60	160	67																	6	1	130	80	5.27	1.22	5.9	2.08	2.62	90	98	41	19	31	32
070132	2	63	158	67																	6	1	130	80	5.57	1.85	6.17	3.1	1.49	92	98	41	20	30	31
070133	2	60	160	62																	6	3	125	80	5.79	1.59	6.08	2.92	1.59	80	90	20	15	28	30
070134	2	58	165	65																	6	3	135	90	5.84	2.79	7.83	3.28	1.46	84	89	25	20	27	31
070135	2	65	165	55	4		1														6	3	140	80	7.92	1.2	8	4.26	2	70	80	20	13	15	25
070136	1	45	170	75																	3	3	125	80	5.12	1.86	4.77	2.07	1.13	87	90	25	20	27	30
070137	1	76	172	65																	6	3	130	80	4.91	1.07	4.75	1.97	1.41	88	93	37	16.5	20	21
070138	2	60	160	55																	6	3	110	80	5.31	1.16	6.76	3.19	1.5	73	80	23	16	21	25
070139	2	53	164	60																	6	3	120	80	5.04	0.87	4.57	1.81	1.57	87	90	27	21	29	32
070140	1	43	174	80																	3	1	130	85	4.49	2.6	6.01	2.67	1.26	98	107	41	19	30	32
070201	2	37	160	56	1	0															6	3	110	80	5.15	0.91	4.98	1.75	1.61	74	90	32	15.5	21	22
070202	2	44	160	75	1	1															6	2	142	92	5.5	1.34	4.58	1.6	1.36	84	105	34	18	35	24
070203	2	61	173	80																	6	3	110	70	5.72	1.78	6.6	2.79	1.59	90	110	42	18	35	34
070204	2	60	157	50																	6	3	120	80	5.21	0.61	4.12	1.34	1.34	73	86	31	15.5	30	31
070205	1	52	170	62																	5	1	100	65	5.87	1.77	5.15	1.79	1.63	81	90	36	16	28	22
070206	2	52	158	53.4																	6	1	105	70	4.71	2.69	6.9	2.74	1.47	81	95	31	16	34	30
070207	2	58	158	58																	6	3	135	85	5.16	1.41	6.19	2.69	1.71	81.5	93.5	34.5	16	40	30
070208	1	84	174	80	1	1															6	1	150	80	5.08	1.55	4.3	1.65	1.25	97	102	39	18.5	22	24
070209	2	44	160	44																	6	3	90	60	4.93	1.22	5.55	1.85	1.78	70	84	33	13	21	23
070210	1	64	165	65																	6	1	120	80	4.99	1.35	4.39	1.81	1.15	82	108	37	24	38	37
070211	2	64	164	82	4		1														6	3	130	80	8.18	2.98	5.44	2.01	1.05
070212	1	36	170	90																	2	3	130	80	5.88	2.86	3.6	1.5	0.76
070213	1	58	172	60																	4	2	125	75	5.26	0.71	3.66	1.31	1.4	80	106	35	35	32	30
070214	2	56	165	60																	6	3	135	70	4.72	1.48	4.27	1.89	1.23	80	105	36	20	35	33
070215	2	26	165	54																	6	1	110	70	4.63	0.65	3.83	1.33	1.55	70	92	30.4	14	26	24
070216	1	38	183	80																	6	1	120	80	5.09	1.42	5.2	2.13	1.37	90	98	42	21	30	30
070217	2	66	168	65	1	1															6	3	130	80	4.9	0.82	5.28	1.81	1.98	84	96	40	19	24	26
070218	1	68	180	80																	3	1	120	80	4.69	5.02	4.47	1.29	0.92	94	108	44	20	31	31
070219	1	42	176	78	1	1															3	1	145	80	4.56	2.9	5.98	2.49	1.28	90	101	40	19	30	31
070220	1	45	170	85	1	1															6	1	150	80	5.06	1.41	4.36	1.78	1.07	97	110	42	20	33	35
070221	1	75	171	60	1	0															6	1	150	90	5.12	0.71	4.94	1.42	2.09	80	86	40	18	23	30
070222	2	44	159	65	1	1															6	3	140	90	4.74	1.4	5.45	2.24	1.52	84	95	30	17	31	30
070223	2	76	162	62	1	1															6	3	150	90	4.36	1.06	5.96	2.54	1.48	84	95	38	16.5	28	27
070224	2	74	160	65																	6	3	150	90	5.15	1.81	4.38	1.67	1.12	87	98	39	17	28	30
070225	1	53	172	97	1	1															3	1	160	95	8.51	2.36	4.18	1.45	0.92	97	107	44	22	30	30
070226	2	42	155	67	1	0															6	1	150	90	5.25	2.83	7.71	3.45	1.29	94	98	40	21	30	30
070227	1	60	174	70	1	0															3	1	140	90	4.96	1.37	5.41	2.31	1.25	87	98	43	21	28	27
070228	1	63	176	65	2																3	1	130	80	4.9	0.82	5.28	1.81	1.98	84	95	40	18	25	23
070229	2	68	162	72	1	0															6	3	150	90	5.5	1.23	5.74	2.27	1.59	87	97	42	21	28	25
070230	1	51	169	72	1	0															3	1	120	90	4.93	4.11	4.04	1.45	0.81	90	94	40	16.3	40	38
070231	2	52	158	70	4		0														6	1	120	80	6.79	1.89	4.44	1.74	1.04	84	94	38	16.8	33	32
070232	1	61	172	65	1	1			2				3								4	2	140	90	5.23	1.38	4.32	1.89	1.19	92	96	37	18	27	22
070233	1	26	183	86																	6	1	120	80	4.46	0.97	4.02	1.31	1.47	95	104	40	17	36	32
070234	2	69	160	63																	6	3	140	90	5.5	1.26	6.42	2.79	1.68	87	98	37	17	32	32
070235	2	46	168	66																	6	3	120	80	6.04	0.73	5.17	1.99	1.73	80	92	38	17	26	27
070236	1	44	170	80																	6	1	130	80	5.73	1.59	5.72	2.55	1.5	97	107	44	20	36	34
070237	2	52	164	80																	6	1	130	80	7.35	2.77	8.12	3.72	1.73	86	108	38	27	38	36
070238	1	45	170	80	1	1															3	1	160	100	6.3	1.04	4.51	2.05	1.12	95	104	39	17	30	41
070239	1	68	168	65																	6	1	125	85	5.36	1.56	4.36	1.77	1.08	80	82	39	16	25	28
070240	1	61	180	70	4		1														3	3	105	70	10.72	1.48	5.64	2.36	1.6	87	96	37	18	27	22
070301	1	73	165	65																	6	3	125	85	4.57	1	6.27	2.78	1.45	85	105	40	17	41	34
070302	2	73	168	50	2																6	3	130	80	5.19	1.69	4.31	1.54	1.34	75	90	34	14	33.5	30
070303	2	45	165	58	1	1															6	3	135	90	4.23	1.41	4.57	1.67	1.27	73	93	35	15	31	20
070304	1	48	176	70																	3	1	130	70	4.45	1.79	5.15	1.99	1.12	84	110	35	18	40	32
070305	1	60	168	80																	4	1	130	70	5.4	1.87	5.23	2.18	1.18	110	100	45	20	43	34
070306	2	60	158	65																	6	3	130	70	5.18	2.02	6.64	2.76	1.71	85	90	38	16	39	32
070307	2	45	163	60																	6	3	270	110	4.5	1.77	4.7	1.52	1.4	80	93	35	16	31	29
070308	2	80	158	110																	6	3	130	70	4.6	2.33	6.4	2.11	1.76	97	118	39	21	40	34
070309	2	52	162	58																	6	3	110	70	4.82	2.61	5.95	1.88	1.69	77	96	32.5	18.5	35	29
070310	1	57	172	75	4		1														6	1	130	80	13.05	1.12	4.44	1.66	1.34	94	96	42	16.5	41	38
070311	2	60	156	64	1	0															6	3	140	80	5.72	3.62	4.92	1.62	1.06	84	108	38	19	36	29
070312	2	74	160	65																	6	3	120	80	5.31	1.42	5.15	2.45	1.51	89	112	38	19	40	31
070313	1	46	182	100																	6	3	120	80	4.7	2.19	4.64	2.23	1.1	110	209	45	29	46	34
070314	1	63	173	71.5	1	0															6	3	140	90	7.43	2.56	5.74	1.96	1.37	84	106	42	20	40	37
070315	2	64	168	67.5																	6	3	120	70	4.96	1.29	6.06	2.23	1.74	89	104	34	16.5	36	29
070316	1	75	182	80	1	1															5	1	158	86	5.06	0.91	5.33	2.18	1.16	100	128	45	54	48	38
070317	1	42	184	110	1	1															6	1	150	90	4.84	1.6	6.01	2.28	1.47	107	128	45	52	52	46
070318	2	73	169	90	1	1			2				4		1						6	3	140	94	6.86	2.32	6.32	2.57	1.39	104	120	40	48	48	40
070319	2	62	158	55	1	1															6	1	138	82	4.01	1.56	4.49	1.43	1.3	73	93	32	38	28	34
070320		63	157	51	1	0															6	3	130	70	4.78	0.88	6.62	2.56	1.75	73	104	31	13.5	29.5	24
070321	2	46	163	75	1	0															6	1	140	80	5.47	0.46	4.85	1.69	1.87	87	107	33.5	15.5	50	32
070322	2	64	158	60	1	1															6	3	140	70	5.09	1.39	6.22	2.52	1.63	74	99	30	15	36	24
070323	2	53	162	65																	6	3	130	80	4.9	1.18	8.13	3.51	2.09	85	104	35	15.5	40	30
070324	1	54	170	65	1	1															3	1	150	90	5.21	0.63	3.9	0.61	1.4	84	114	41	53	43	24
070325	2	53	160	50																	6	3	110	76	5.27	2.29	5.88	2.36	1.56	73	94	28	30	30	18
070326	2	81	160	56	1	0															6	3	110	70	4.98	1.09	6.5	2.53	1.64	73	99	34	38	32	20
070327	1	51	169	65																	6	3	110	70	5.9	1.61	4.9	2.9	2.5	90	110	40	24	43	22
070328	2	47	158	55																	6	3	130	70	4.8	1.71	5.52	2.89	1.27	73	93	37	15	49	22
070329	1	45	180	92																	6	3	120	70	5.31	1.42	5.15	2.45	1.51	97	117	42	23	44	22
070330	1	65	170	65	4		1														6	3	140	80	14.19	2.15	5.15	1.9	1.47	90	110	41	22	42	21
070331	2	45	159	56																	6	3	110	70	4.71	1.1	4.71	1.38	2.03	80	95	38	16	49	21
070332	2	63	158	60	1	0															6	1	140	80	4.88	2.01	4.62	1.43	1.54	80	100	30.5	13.5	40	30
070333	2	62	158	60																	6	3	130	70	4.69	0.89	5.3	2.15	1.77	80	102	31	14.5	34	32
070334	1	70	168	75	1	1															6	1	130	70	9.94	1.47	3.83	1.92	1.06	97	110	40		40	31
070335	2	68	156	68	1	1															6	3	140	80	5.27	2.19	4.47	1.69	1.41	87	110	32	16	40	30
070336	2	45	163	78																	6	3	110	70	4.95	1.09	4.4	1.69	1.5	80	112	32	14.5	36	28
070337	1	57	179	87																	6	1	130	70	5.63	2.35	5.92	2.24	1.51	97	110	45	26	42	34
070338	2	55	150	53	4		1														6	3	130	70	5.74	1.81	4.45	1.55	1.4	84	118	36	21	39	24
070339	1	60	174	90																	6	3	130	85	5.37	1.62	6.76	1.61	3.14	100	107	25	20	32	30
070340	2	66	158	75	1	1	1		4		1										6	3	140	90	7.95	1.59	4.14	1.55	1.18	90	108	42	17	29	38
070401	2	75	156	52																	6	3	120	80	4.73	1.1	6.27	2.39	1.76	77	89	30	16	20	20
070402	2	65	160	62	1	1															6	3	145	85	5.23	1.65	6.35	2.53	1.58	88	100	34	18	25	30
070403	2	62	160	62																	6	3	110	70	5.43	1.96	7.15	2.91	1.47	86	93	34	16	20	20
070404	1	65	165	65																	6	3	110	70	5.32	1.25	6.57	2.6	1.57	87	97	31	18	30	30
070405	2	61	156	59																	6	1	120	80	4.57	1.27	6.12	2.29	1.6	75	87	32	15	18	20
070406	1	63	174	80																	2	3	120	80	5.87	1.4	5.56	2.16	1.48	100	110	38	19	20	29
070407	2	63	162	70	1	0															6	3	130	20	5.1	6.8	4.7	2.89	2.01	91	102	37	18	36	34
070408	2	52	159	65																	6	1	120	70	7.2	1.3	4.77	1.9	13.1	80	99	34	16	30	30
070409	2	59	160	55																	6	3	127	73	5.9	1.89	7.7	2.88	1.98	80	90	33	15	20	18
070410	2	78	148	46																	6	3	110	70	4.69	3.59	5.86	2.07	1.1	70	88	30	15	12	20
070411	2	64	163	73	1	1			2												6	3	135	78	5.15	1.48	6.91	2.91	1.83	92	100	36	20	33	30
070412	2	65	162	65	2																6	3	120	80	5.22	3.49	6.07	1.99	1.16	95	100	36	17	29	42
070413	1	64	176	74	5																3	1	120	80	5.06	1.38	5.47	2.17	1.5	94	105	38.5	18	30	20
070414	2	61	156	59																	6	3	120	70	5.46	4.29	6.49	1.6	1.89	80	95	32	16	30	32
070415	1	63	167	72																	3	1	120	80	5.05	0.96	3.72	1.36	0.89	95	95	39	17	11	20
070416	2	59	162	58	4		1														6	3	120	80	6.46	1.97	5.28	2.14	1.44	77	97	34	7	30	38
070417	1	61	174	86	1	1															2	3	150	90	6.24	4.05	5.25	1.48	1.39	101	101	43	20	18	20
070418	2	57	164	70																	6	3	130	80	5.43	2.54	6.52	2.51	1.53	83	100	35	16	30	36
070418	2	78	160	70	1	1	1		4		1										6	3	140	90	8.25	1.61	5.82	2.44	1.52	84	87	36	16	36	38
070419	1	59	178	85	1	1															3	1	135	90	4.97	2.36	5.48	2.24	1.14	101	108	43	19	16	20
070420	1	55	178	80																	6	3	130	80	5.36	1.47	5.24	2.16	1.38	100	108	40	19	20	26
070421	2	54	165	50																	6	3	120	80	4.65	1.18	5.78	1.8	2	80	90	30	16	27	27
070422	1	49	176	78	1	1															6	3	140	95	4.93	1.92	4.17	1.63	1.07	83	108	38	19	36	25
070423	2	51	160	69	5																6	3	130	70	5.2	3.59	4.38	1.53	1.05	85	105	38	18	35	23
070424	2	75	163	60	1	1															6	3	140	90	5.28	1.02	4.78	1.88	1.5	78	98	36	18	34	22
070425	1	50	173	71																	3	1	120	80	5.18	1.91	5.81	2.6	1.66	87	96	37	17	10	10
070426	1	45	170	86	1	1															6	3	145	95	6.5	1.66	5.65	2.46	1.39	94	110	43	19	32	21
070427	2	57	158	50																	6	1	108	79	7.2	1.3	4.71	1.9	1.31	68	92	29	14	29	26
070428	1	48	170	72	1	1															6	1	138	86	4.5	1.98	4.58	1.6	1.36	84	102	35	16	37	26
070429	2	16	172	80																	6	3	145	80	4.8	1.3	4.2	1.8	1.4	80	108	34	15	35	24
070430	2	70	161	69	1	1	1		4		1										6	3	145	92	17.5	1.34	4.59	1.6	1.36	82	108	36	16	37	26
070431	1	70	175	75	4		1														3	1	138	85	7.8	1.99	4.4	1.7	1.3	98	112	37	18	42	29
070432	2	47	162	54																	6	1	110	75	4.81	0.79	5.56	2.09	1.92	87	98	37	18	27	29
070433	2	68	155	51																	6	3	120	70	5.51	1.43	6.65	3.27	1.31	82	90	40	16	28	30
070434	2	57	156	60																	6	3	130	80	5.49	0.82	7.49	3.37	1.9	90	98	40	17	29	32
070435	1	48	178	78																	6	1	130	95	5.17	4.85	7.39	3.23	1.03	94	102	41	19	30	31
070436	1	59	172	70																	6	3	130	80	5.61	1.5	4.97	1.72	1.55	95	100	25	20	30	32
070437	2	50	160	55																	6	1	110	70	5.39	1.09	5.69	2.08	1.9	87	98	37	16	27	30
070438	2	45	156	60																	6	3	110	80	3.94	0.95	8.37	3.13	2.57	84	100	33	16	30	30
070439	1	65	169	75																	6	3	140	85	4.81	1.57	6.65	2.31	2.56	95	100	25	20	32	36
080101	2	53	158	65	1	1			2				4		1						6	1	150	90	7.9	1.13	4.91	2.9	1.69	79	99	34	16	26	33
080102	1	56	172	72	1	0			2												4	1	140	87	5	0.78	4.06	2.05	1.62	89	102	45	19	26	31
080103	2	49	164	83																	6	3	126	78	5.66	0.77	4.42	3.19	1.23	92	118	44	20	27	31
080104	2	49	147	51																	6	3	126	77	4.9	0.78	5.42	3.12	1.55	75	94	30	14	20	30
080105	2	52	153	60																	6	3	110	70	6	0.76	5.39	3.88	1.55	77	97	32	15	24	32
080106	2	42	160	60																	6	3	120	72	5	1.21	4.34	1.37	3.07	77	98	33	15	25	32
080107	2	58	160	65																	6	3	110	70	4.8	3.38	3.39	3.38	1.55	86	102	42	19	26	30
080108	2	55	158	80																	6	3	110	70	4.8	3.38	3.39	3.38	1.55	90	105	45	20	26	33
080109	2	52	162	70																	6	3	110	70	4.6	0.38	3.39	3.38	1.55	86	103	43	19	25	30
080110	2	58	162	66	1	0															6	3	120	70	5.1	1.52	3.8	2.26	1.35	79	98	31	14	26	32
080111	1	58	172	61																	6	3	160	70	4.7	2.15	5.4	3.04	1.43	82	98	41	18	25	30
080112	1	60	182	75																	6	1	110	70	4.7	1.52	5.1	3.17	1.42	90	106	46	19	27	32
080113	2	60	160	55																	6	3	110	70	4.9	1.1	5.1	3.24	1.53	75	97	31	14	23	30
080114	1	65	160	70																	6	3	110	70	5.1	1.23	4.5	3.05	1.51	86	101	42	19	26	31
080115	2	63	165	65																	6	3	110	70	4.7	0.78	4.06	2.05	1.46	85	101	41	20	25	31
080116	1	57	173	75																	6	3	110	70	5.1	1.21	4.03	1.63	1.52	86	105	42	20	26	31
080117	2	53	163	64																	6	3	111	64	5	1.76	4.34	3.07	1.37	84	97	34	19	25	29
080118	2	65	163	60																	6	3	120	80	4.6	1.72	3.32	2.93	1.37	85	98	35	18	26	30
080119	2	63	162	70																	6	3	115	76	5.8	1.29	6.07	3.07	1.24	86	99	36	19	27	32
080120	2	64	163	68	1	1															6	3	135	80	4.6	0.76	4.32	3.05	1.3	83	90	35	16	32	35
080121	2	60	160	80																	6	3	110	80	5.1	0.72	5.22	2.93	1.32	90	105	34	18	27	32
080122	2	60	158	60	1	1															6	3	120	80	4.9	1.37	7.1	4.6	2.37	78	97	31	14	24	30
080123	2	53	158	58	1	1			2												6	3	150	90	50	4.6	6.1	3.9	1.13	133.2	30	31	15	26	32
080124	1	47	176	60																	3	3	110	70	5.28	1.16	4.68	2.97	1.44	85	87	35	16	26	33
080125	2	46	162	62	2																6	3	130	80	5.13	1.78	4.32	2.32	1.33	80	83	35	15	24	28
080126	2	65	158	55	1	1															6	3	115	70	4.7	1.33	5.32	2.93	1.52	78	94	33	17	23	29
080127	1	65	165	65																	6	3	120	70	5.4	0.72	4.43	2.51	1.32	81	94	33	16	25	29
080128	2	62	161	48																	6	1	110	70	5	0.72	1.3	1.37	1.26	72	93	30	14	23	30
080129	1	72	172	66	4		0		5												4	3	120	70	4.9	0.68	3.8	2.26	1.35	91	105	37	17	27	30
080130	2	69	158	50																	6	3	120	80	5.1	1.21	3.4	2.13	1.26	75	92	30	16	25	31
080131	2	75	153	50																	6	3	110	80	5.24	1.63	4.11	2.8	0.94	83	96	34	17	23	26
080132	1	78	166	120																	5	1	120	80	5.23	3.2	4.66	3.3	0.67	85	94	30	16	27	32
080133	2	51	160	130																	6	3	120	80	5	1.15	2.8	1.36	1.22	85	92	40	20	26	30
080134	2	60	160	53																	6	3	124	71	5.1	1.17	2.7	1.12	1.33	83	95	34	18	24	26
080135	2	68	166	75	1	1			2				3								6	1	130	85	5.2	0.72	2.9	1.29	1.22	87	103	39	20	26	31
080136	1	81	170	75	1	1			2												6	2	150	80	5	1.22	2.17	1.32	1.15	92	101	44	18	28	33
080137	2	81	160	55																	6	3	125	70	6.1	1.23	2.6	2.03	1.05	82	97	34	18	22	26
080138	2	63	160	62.5																	6	1	132	78	4.46	0.79	5.41	2.92	2.74	80	92	34	18	23	26
080139	1	65	174	80	1	1	1		4		1										6	1	125	75	7.33	2.24	7.93	6.32	1.32	87	105	38	20	26	32
080140	2	50	155	60																	6	3	120	80	5.1	1.52	2.9	1.77	1.23	75	92	30	16	24	30
080201	2	56	164	54																	6	3	113	70	5.43	2.77	8.3	4.5	1.36	90	98	34	17	17	21
080202	1	51	170	70																	6	1	135	85	5.4	1.3	3.89	1.99	1.59	92	112	36	20	20	22
080203	2	40	155	50																	6	3	121	72	4.6	1.4	3.76	2.7	1.43	87	103	32	18	18	27
080204	1	49	175	65	3																2	1	120	80	4.9	1.08	4.6	3.5	1.16	75	90	30	15	20	18
080205	2	49	160	65																	6	3	135	70	5	1.07	4.7	3.62	1.17	80	90	32	18	18	20
080206	1	57	175	60																	5	3	120	75	5.2	1.09	4.7	3.72	1.21	80	85	28	17	22	20
080207	2	57	160	65																	5	3	130	80	5.8	1.07	4.9	3.62	1.17	75	90	30	18	20	18
080208	2	55	158	48																	6	3	125	75	5.7	1.08	4.6	3.52	1.17	80	90	30	15	20	18
080209	1	58	172	68																	3	1	125	85	5.7	1.08	4.7	3.62	1.21	80	95	28	18	22	20
080210	1	65	172	65	4		0														3	1	125	80	9.9	0.98	4.17	2.54	1.55	80	90	30	20	20	18
080211	2	63	158	55	2																6	3	130	85	5.8	1.17	5.2	3.81	1.21	80	90	30	20	20	18
080212	1	61	172	72	1	1															6	1	125	85	6.2	1.8	7.8	3.5	2	80	95	30	18	22	18
080213	2	58	158	75																	6	3	135	85	5.7	1.07	4.7	3.55	1.17	75	90	30	15	20	18
080214	1	56	177	70																	6	3	125	80	5.7	1.08	4.7	3.62	1.16	80	90	30	17	22	20
080215	2	57	158	65	4		1														6	3	115	85	5.5	1.09	4.7	3.62	1.2	75	90	28	18	20	18
080216	1	59	164	60																	6	3	125	80	5.5	1.1	4.8	3.82	1.22	85	90	30	17	18	18
080217	2	58	162	65																	6	3	125	80	5.7	1.09	4.7	3.72	1.21	80	85	30	20	20	18
080218	2	65	160	69																	6	3	125	85	5.5	1.08	4.8	3.73	1.22	80	85	30	20	20	18
080219	2	68	164	70	1	1															6	3	130	85	5.7	1.09	5.2	3.72	1.21	80	90	40	25	18	20
080220	2	79	155	64	1	0			2												6	3	130	85	5.3	1.09	5	3.74	1.21	85	90	30	21	22	20
080221	2	73	148	62	1	1															6	3	120	80	5.3	1.1	4.7	3.74	1.17	80	90	30	20	18	18
080222	2	64	158	65																	6	3	125	80	5.7	1.06	4.6	3.74	1.12	75	90	28	18	20	18
080223	2	70	161	69																	6	3	117	87	5.9	4.6	3.67	1.73	2.41	86	101	33	21	20	23
080224	2	64	165	75																	6	3	120	85	4.8	1.61	4.51	3.61	1.71	81	96	34	18	18	21
080225	2	64	157	70																	6	3	125	85	5.6	1.17	4.7	3.61	1.71	81	94	34	19	20	22
080226	2	56	157	80																	6	3	115	75	4.7	1.13	4.8	3.51	1.71	82	98	34	18	20	20
080227	2	71	158	55	1	0															6	3	120	85	5.6	1.08	4.7	3.4	1.15	80	95	35	18	20	21
080228	2	58	164	155																	6	1	115	85	5.6	1.15	4.81	3.51	1.35	80	98	34	18	20	22
080229	2	65	158	63																	6	3	120	80	5.7	1.06	4.8	3.48	1.15	80	95	35	18	20	21
080230	1	70	170	50																	6	3	115	80	4.7	1.8	3.78	2.67	1.71	86	98	34	19	20	23
080231	2	62	160	62																	6	3	125	85	5.1	1.8	3.41	2.71	1.45	84	96	32	18	20	21
080232	2	44	158	50																	6	3	120	80	5.7	1.06	4.8	3.48	1.15	80	95	35	18	20	20
080233	2	62	159	52																	6	3	125	85	4.6	1.7	4.8	1.78	2.4	86	98	32	18	20	24
080234	2	62	164	59	1	1															6	3	120	85	4.8	1.7	4.2	1.87	2.31	89	97	34	20	20	24
080235	2	61	162	63	1	0			4		0										6	3	130	85	4.8	1.8	4.71	2.3	1.77	86	98	34	18	20	22
080236	2	43	155	55																	6	1	120	70	4.86	0.48	4.05	2.82	1.24	80	92	35	14.5	26	30
080237	1	59	170	152	4		0														6	3	117	80	5.7	1.7	4.71	2.17	2.56	86	99	34	18	20	23
080238	2	62	166	68	1	1															6	3	120	80	6.1	1.7	4.15	2.05	1.71	88	97	32	18	18	24
080239	2	46	158	67																	6	3	120	80	5.7	1.06	4.8	3.48	1.15	80	95	35	18	20	20
080240	2	58	172	69																	6	3	130	85	5.2	1.7	4.25	1.78	1.51	90	101	32	18	18	22
080301	2	65	160	58	1	1			4		0										6	3	150	90	6.86	1.59	5.69	3.76	1.66	82	97	32	15	19	22
080302	1	64	175	87	1	1															6	1	140	85	5.5	2.03	6.78	4.46	1.83	103	105	42	20	25	28
080303	2	66	160	69	1	1			3				4		0						6	3	140	85	7.75	2.1	4.72	2.58	1.76	94	95	34	16	18	34
080304	2	70	156	50																	6	3	110	78	4.7	1.7	7.1	4.7	1.75	230	290	110	14	12	12
080305	1	74	173	76	3																6	3	130	85	5.4	1.57	4.14	3.04	0.94	270	106.56	123	18	11	10
080306	1	73	168	65	1	0															5	3	140	90	4.47	0.54	5.91	4.2	1.83	89	93	34	17	22	24
080307	2	71	155	59	1	1															6	3	140	80	4.86	1.11	4.05	2.65	1.11	95	99	36	15	20	30
080308	1	53	170	90	1	1	1		4		1										3	1	130	85	11.37	1.37	5.05	3.45	1.19	92	98	43	21	24	27
080309	2	61	180	95	1	1															6	3	140	90	3.77	8.74	6.1	3.06	0.74	108	110	142	19	18	28
080310	2	65	161	72	1	1	1		4		1										6	3	140	80	11.83	2.27	5.34	3.22	1.82	102	105	38	16	29	32
080311	2	70	156	60	2				4		0										6	3	120	80	11.05	1.24	5.59	3.79	1.59	82	98	30	15	11	11
080312	2	67	160	62	1	0			2												6	1	130	85	4.5	1.38	5.52	3.85	1.48	86	93	33	16	18	13
080313	1	69	174	75	1	0															3	1	121	77	5.6	0.84	4.08	2.62	1.19	85	87	39	17	9	14
080314	2	63	152	57	1	1			2				3				4		1		6	3	157	71	11.3	1.25	4.32	4.32	1.25	80	92	37	15	19	28
080315	1	64	168	55																	4	3	120	70	5.05	1.67	5.57	4.11	1.34	72	86	35	16	9	11
080316	2	62	160	60	1	1			2				4		1						6	3	135	85	8.04	3.33	5.99	3.39	1.11	83	90	35	15	20	29
080317	1	71	168	138	1	1	1		4		1										6	3	150	90	6.07	2.03	3.22	1.46	1.15	87	95	39	16	22	23
080318	2	72	165	65	4		0														6	3	140	80	7.58	2.03	5.15	3.67	1.1	89	95	33	15	12	19
080319	2	69	160	63	2																6	3	128	77	5.26	1.64	6.07	4.14	1.53	86	103	32	16	21	28
080320	1	73	175	80	1	1															6	1	150	95	6.82	0.99	4.91	3.02	1.35	99	102	41	18	20	20
080321	1	59	171	78																	6	1	130	80	6	1.6	4.7	3.4	1.5	88	95	42	21	22	23
080322	2	60	166	55																	6	1	130	75	5.9	2.45	7.32	4.6	1.55	72	94	33	15	8	10
080323	2	59	156	65																	6	1	120	70	4.01	1.5	6.2	4.05	2.29	85	110	33	16	21	22
080324	2	44	160	70																	6	1	110	70	5.6	1.35	5.11	3.62	1.44	85	96	35	15	29	30
080325	2	45	158	55																	6	1	110	67	4.96	0.68	4.3	2.7	1.73	76	93	34	14	20	23
080326	1	51	170	85																	3	1	134	83	5.07	1.98	4.94	2.46	1.41	90	103	41	18	26	27
080327	2	43	162	60																	6	1	110	70	4.88	0.64	4.9	2.98	1.86	82	92	33	15	20	20
080328	1	65	169	85	4		1														3	1	140	80	13.37	1.24	5.27	3.42	1.21	93	98	44	20	22	24
080329	1	62	196	94	1	1															6	1	140	100	6.84	1.88	3.14	1.83	0.73	100	105	43	21	22	24
080330	1	62	166	70																	5	3	110	70	7.8	1.93	6.84	5	1.15	90	95	40	17	20	20
080331	2	50	165	56																	6	1	120	70	4.4	0.62	4.52	2.51	1.93	78	86	32	15	19	18
080332	2	51	165	70																	6	1	130	80	5.52	1.2	5.84	4.4	1.28	86	96	38	17	20	20
080333	1	56	174	65																	2	1	130	80	4.49	4.9	5.3	2.67	1.27	84	94	42	20	25	26
080334	1	48	178	140	1	1															3	1	140	90	5.26	1.45	5.11	3.56	1.59	86	94	38	18	20	18
080335	2	52	162	65	1	1			2												6	1	140	85	5.66	4.16	5.56	3.64	1.15	76	96	35	16	20	20
080336	2	46	160	60																	6	3	110	70	4.99	0.49	3.84	2.35	1.57	80	86	34	15	20	20
080337	2	57	160	60	1	0															6	1	120	80	4.78	0.71	4.39	2.79	1.81	70	85	36	18	19	20
080338	1	58	180	70	1	0															6	1	145	80	4.87	1.59	5.46	4.08	1.35	86	90	41	18	21	21
080339	2	78	156	58																	6	3	140	80	5.21	1.69	5.55	3.47	1.02	75	85	38	15	18	18
080340	1	47	166	76	4		1														1	1	140	90	9.89	1.7	5.6	3.56	1.85	86	92	39	17	20	20
080401	2	61	160	60	1	1															6	3	136	82	5.77	1.31	5.39	4.04	1.23	85	100	39	18	20	28
080402	2	61	158	64																	6	3	130	80	4.89	2.44	5.1	2.54	1.21	80	87	41	18	17	26
080403	2	78	160	50	1	1															6	3	146	72	4.9	1.72	6	3.98	1.46	77	81	36	17	15	24
080404	2	81	160	52																	6	3	138	80	4.88	0.9	5.4	3.65	1.55	77	79	39	18	17	28
080405	2	66	164	60																	6	3	140	88	4.6	1.06	5.89	3.71	1.65	80	85	43	19	18	31
080406	1	67	169	74	3																6	3	135	87	3.85	1.38	4.29	2.62	1.3	95	98	48	21	17	21
080407	2	60	155	65																	6	3	132	75	4.65	1.62	4.5	2.58	1.22	86	91	41	19	17	28
080408	1	61	173	85	1	1															6	3	135	77	5.1	1.87	3.21	3.65	2.11	88	99	35	17	15	21
080409	2	64	165	56	1	1															6	3	148	86	4.89	1.19	5.7	2.45	1.46	86	95	45	18	17	26
080410	2	61	160	55	4		1														6	3	138	85	5.07	1.24	5.4	2.33	1.26	80	86	41	17	16	25
080411	2	56	156	63																	6	3	130	80	5.2	2.11	3.65	1.32	1.25	84	87	43	18	16	25
080412	1	58	170	65	3																6	3	138	87	4.9	1.87	2.16	3.21	1.15	82	85	45	18	13	21
080413	2	55	155	65																	6	3	130	80	4.8	1.08	4.36	3.14	1.19	86	91	43	17	16	26
080414	1	58	157	67																	3	1	130	80	4.75	1.64	6.1	3.88	2.14	87	92	46	21	14	21
080415	2	63	160	65	1	1															6	3	132	78	5.2	1.81	3.87	2.36	1.16	86	91	43	17	15	26
080416	1	69	175	75	1	1	1		4		1										6	3	148	87	7.82	1.84	3.7	2.21	1.1	91	96	47	21	16	28
080417	2	57	169	67																	6	3	135	85	4.77	1.09	5.3	3.32	1.77	87	93	46	17	17	28
080418	2	53	160	68																	6	3	135	85	4.6	2.34	5.7	3.43	1.67	86	91	43	18	16	27
080419	2	58	157	65	1	1															6	3	145	85	5.47	1.27	4.28	2.95	1.27	86	92	45	18	16	27
080420	2	82	155	65																	6	3	130	80	6.82	2.03	6.5	4.49	1.69	87	95	46	19	17	27
080421	2	50	163	65																	6	3	132	78	4.26	1.19	4.32	2.97	1.15	86	93	44	16	16	24
080422	2	53	155	58	4		1														6	3	135	85	5.2	1.95	6.09	4.55	1.29	87	95	46	19	17	31
080423	1	69	179	77	1	1	1		4		1										6	3	130	80	5.2	2.15	3.89	3.21	1.61	87	91	45	20	14	17
080424	1	69	170	75	1	0															3	3	136	78	5.94	0.76	3.36	1.99	1.35	103	107	48	21	16	31
080425	1	77	173	70	1	1			2												6	3	138	86	5.14	1.39	5.14	3.11	1.21	100	108	46	21	17	32
080426	1	77	176	80	1	1															5	1	155	70	5.06	1.76	5.12	2.61	1.57	100	110	38	20	27	38
080427	2	65	152	65																	6	3	135	85	4.9	2.11	3.26	3.21	1.65	83	87	45	18	16	31
080428	2	66	169	75	4		1														6	3	130	80	6.65	0.97	3.9	2.84	1.04	87	91	46	21	15	31
080429	2	63	165	70	4		1														6	3	132	85	6.23	1.81	4.6	3.09	1.2	85	91	38	17	15	29
080430	2	47	168	65																	6	3	110	70	5.8	3.54	5.3	1.52	2.89	80	100	36	18	18	22
080431	1	74	172	65	1	1															6	3	153	105	4.82	0.79	3.42	1.88	1.18	87	92	47	21	16	33
080432	1	68	160	65	1	1			2												6	3	140	75	5.98	1.45	6.32	4.14	1.76	100	107	46	22	17	36
080433	2	79	152	58	4		1														6	3	135	86	4.8	1.81	2.11	3.21	1.15	82	86	41	17	16	27
080434	2	55	162	55																	6	3	130	85	6	1.3	5.2	3.62	1.4	83	86	38	17	16	27
080435	2	44	160	67																	6	3	123	85	5.7	1.52	2.52	3.35	1.52	98	91	38	16	15	24
080436	2	66	155	45																	6	3	100	60	4.7	1.8	5.68	2.7	3	86	100	34	10	18	35
080437	2	72	153	62																	6	3	120	80	5	1.5	5.7	2.7	2.8	86	105	38	12	20	35
080438	2	63	159	65																	6	3	140	85	5.89	1.51	7.07	5	1.51	90	98	33	18	18	21
080439	1	80	168	65																	6	3	135	90	5.7	3.4	4.1	2.71	1.51	94	105	32	19	19	30
080440	2	66	157	61																	6	3	125	85	6	2.4	4.78	2.56	1.47	90	102	32	18	20	28
080501	2	74	157	58	1	1	1		4		1										4	3	168	76	4.7	1.05	3.21	2.87	1.25	90	98	40	18	18	25
080502	2	64	160	60																	6	3	140	90	4.9	1.12	3.07	2.51	1.28	80	95	36	16	17	21
080503	1	63	170	80	1	0			2				3				4		1		6	3	125	65	6.84	1.41	3.1	1.55	1.25	86	100	45	25	20	35
080504	2	66	162	65	4		0														6	3	136	75	5.1	1.87	3.15	2.89	1.61	80	98	35	18	15	12
080505	2	67	158	59	1	1															6	3	153	63	5.09	1.69	5.69	3.6	1.67	86	98	38	19	18	22
080506	2	68	167	65	1	1			2												6	3	142	81	5.17	1.46	4.84	3.19	1.87	80	90	36	19	15	23
080507	2	66	160	74	1	1			2												6	3	165	95	7.41	0.44	4.74	2.73	1.26	100	112	40	20	18	28
080508	2	70	152	65	1	1															4	3	180	100	5.61	1.72	4.96	2.47	1.63	86	96	37	18	18	30
080509	2	81	158	65	1	0															6	3	169	95	5.34	1.29	6.81	4.73	2.16	93	101	40	20	19	25
080510	1	65	180	84	1	1															6	3	163	103	4.68	1.42	4.42	3.39	1.26	85	98	45	25	17	30
080511	2	68	157	59	1	1															6	3	154	84	5.21	3.14	4.93	2.12	1.37	83	98	39	18	15	25
080512	2	67	157	63	1	1															6	3	135	78	5.2	2.01	3.25	2.87	1.15	90	100	39	20	18	28
080513	2	58	164	65																	6	3	136	85	4.87	1.82	4.64	2.37	1.68	80	96	38	20	17	30
080514	2	58	165	65																	6	3	135	78	5.76	1.72	5.72	1.76	1.84	76	95	35	18	19	28
080515	2	61	164	60																	6	3	125	78	5.78	1.24	6.21	3.17	1.26	80	96	36	15	16	21
080516	1	75	171	63																	6	3	138	75	4.9	1.25	3.21	3.27	1.66	90	100	42	20	17	35
080517	2	45	160	65																	6	3	136	75	5.1	1.61	3.18	2.11	1.16
080518	2	68	155	60	1	1															6	3	177	75	5.69	1.39	6.86	4.09	2.14	87	98	38	20	18	25
080519	2	83	143	46	3																6	3	132	66	5.1	1.65	4.21	3.21	1.65	75	89	35	15	15	20
080520	2	75	155	61	1	1			2												6	3	176	78	5.59	0.7	4.86	2.09	2.22	93	108	38	20	19	30
080521	1	78	168	74	1	1															6	3	180	100	5.81	2.81	4.74	2.64	0.92	89	100	41	25	16	30
080522	1	52	176	75																	3	1	125	75	5.5	1.87	3.46	2.15	1.15	87	96	37	15	15	20
080523	2	59	165	60																	6	3	130	80	5.1	1.65	3.21	3.65	2.15	75	78	36	16	14	25
080524	1	42	180	80																	6	1	132	67	4.8	2.81	3.78	3.21	1.65	89	102	38	16	16	21
080525	2	58	163	51																	6	3	136	85	5.72	1.81	4.36	2.46	1.37	72	93	33	14	17	21
080526	1	73	170	74	1	1			2				3								5	2	135	85	4.41	2.25	6.3	4.19	1.39	90	101	45	20	17	30
080527	2	61	166	57																	6	3	120	82	5.1	1.74	7.87	5.45	1.85	70	86	32	18	16	22
080528	2	59	153	47	2																6	3	133	77	4.64	1.16	0.34	4.38	1.56	71	98	32	17	15	20
080529	2	72	158	60																	6	3	138	77	5	4.21	1.28	3.21	2.16	85	98	36	18	15	25
080530	1	60	173	71	1	0			2				3								6	3	147	82	5.81	1.48	5.34	3.67	1.14	96	108	45	22	18	35
080531	1	71	168	68	1	1			2				4		1						6	3	152	90	7.47	1.89	3.3	2.24	0.94	80	98	42	18	17	35
080532	2	68	160	52	1	1			2				4		1						6	3	133	74	5.57	1.02	4.5	2.77	1.68	70	98	36	18	18	28
080533	2	53	165	58																	6	3	125	87	4.9	1.81	3.67	2.11	1.87	85	98	36	18	17	25
080534	2	71	158	52	1	0			4		0										6	3	120	80	5.38	1.51	5.2	3.52	1.71	80	96	35	15	15	20
080535	1	64	170	54																	6	3	130	80	3.98	1.33	5.6	3.12	2.4	80	98	35	18	15	20
080536	2	63	160	52.5	1	1															6	3	140	80	4.8	0.93	6.57	4.34	1.8	80	98	35	18	12	20
080537	2	61	165	55																	6	3	120	70	5.27	0.76	6.44	3.95	2.28	70	98	35	15	18	20
080538	1	61	173	70	1	1															3	1	130	80	4.43	1.73	5.8	4.22	1.25	90	101	45	22	18	30
080539	2	74	162	63	1	1			2												6	3	133	76	5.59	3.12	6.38	3.86	1.09	87	98	38	20	18	25
080540	2	70	162	60	1	0															6	3	135	90	5.1	1.61	3.67	2.71	1.62	85	98	36	19	15	25
090101	2	52	163	65																	6	3	125	65	4.57	1.72	4.57	2.25	1.29	84	100	35	17	20	28
090102	1	52	175	54																	6	1	115	65	5.03	1.23	5.03	1.7	2.69	70	88	34	17.5	5	8.5
090103	1	48	165	50																	6	3	124	70	3.98	0.77	3.98	1.63	1.64	66	82	32	15.5	6	7
090104	2	46	160	61																	6	3	128	70	4.23	1.35	4.06	1.87	1.18	76	106	32	17	19	12
090105	1	53	174	80	2				5												2	1	138	78	6.02	2.35	5.48	3.22	1.13	104	100	38	17	11	16
090106	2	69	152	67	1	1			2				4		1						6	3	160	100	6.81	2.25	4.67	2.29	1.34	93	108	8	16.5	11	28
090107	2	58	163	66	4		1														6	3	128	83	6.92	3.01	7.44	4.97	1.63	95	97	34.5	16.5	18	19
090108	2	64	153	63	1	1			3												6	3	132	72	5.75	1.27	4.65	2.86	1.19	92	105	33	17.5	20	18
090109	2	59	158	70																	6	1	142	80	4.75	1.09	6.45	2.74	1.5	93	100	37	16	25	28
090110	2	57	160	63																	6	3	122	75	4.54	1.1	7.7	4.16	2.63	84	100	34	15.5	18	11
090111	2	57	165	62																	6	3	110	70	3.89	1.31	5.57	2.94	1.32	92	102	37	16	16	16
090112	1	60	175	60	1	1															2	1	152	78	4.8	3.39	5.18	2.73	1.59	78	95	36.5	17	6	12
090113	2	63	155	70	1	0															6	3	150	88	6.5	2.23	5.51	3.51	1.45	95	103	35	18.5	25	32
090114	1	65	165	67	1	0			3												6	3	140	90	5.37	1.88	4.98	3.23	1.06	85	95	36	17	22	24
090115	2	63	162	62	1	0															6	3	128	70	5.26	2.03	6.1	3.51	1.25	86	92	33	17.5	22	17
090116	2	60	165	70																	6	1	128	72	5.21	0.71	4.33	1.6	1.82	86	107	39	17	20	24
090117	2	77	158	61																	6	3	139	71	4.19	1.24	5.42	3.17	1.13	88	100	36	17	18	15
090118	2	60	158	65																	6	3	133	75	4.71	1.65	6.12	3.81	1.33	97	106	30.5	16.5	34	23
090119	2	76	160	54	1	1			2												6	3	138	76	5.37	1.79	6.18	4.22	1.42	100	100	31	15	15	12
090120	1	44	162	75																	6	3	133	90	4.91	1.95	3.42	2.09	1	103	96	38.5	19	10	18
090121	1	52	160	70	4		0														4	3	138	68	13.29	1.48	5.2	3.05	1.34	90	99	40	16	8	24
090122	2	60	153	73	1	0															6	3	156	94	5.66	1.51	7.52	3.87	1.51	101	103	37.5	6.5	18	24
090123	2	51	158	52																	6	3	132	78	4.77	0.45	4.89	1.88	2.2	80	93	30	15	12	12
090124	2	44	156	55																	6	3	126	72	4.5	0.77	4.35	2.35	1.14	72.5	91	32	15.5	21	22
090125	2	49	160	75																	6	1	120	80	4.6	1.22	5.36	2.92	1.47	96	105.5	37	15	30	30
090126	1	55	180	72.5	4		0														3	1	145	96	6.25	0.77	5.24	2.9	1.76	84	98	37	17.5	7	16
090127	2	55	162	60																	6	3	116	65	4.47	1.1	5.22	2.28	1.89	78	93	34	16	20	17
090128	2	40	164	63																	6	1	120	80	4.93	1.94	3.94	2.11	0.88	75	100	39	16	24	26
090129	1	50	170	88	1	1															6	1	130	95	5.2	2.08	5.26	2.93	1.15	104	109	43	17.5	14	36
090130	1	63	165	70																	3	3	128	72	4.3	2.53	4.91	2.57	0.9	98	101	39	18.5	14	20
090131	2	52	158	61																	6	3	128	76	4.62	0.77	4.33	2.08	1.5	85	94	32	16.5	16	18
090132	2	54	150	70	1	1															6	3	143	87	5.11	1.63	6.61	4.06	1.38	95	100	38	15.5	16	20
090133	2	76	147	52	1	1															6	3	125	65	5.26	1.11	5.38	2.84	1.74	82	92	30	15	15	14
090134	2	60	160	53																	6	1	141	77	5.4	1.35	4.45	2.03	1.43	80	95	36	16.5	20	22
090135	2	70	155	60	1	1			2												3	3	149	96	4.94	0.82	4.94	2.93	1.34	99	106	34	16	22	28
090136	2	64	157	85	1	0															6	3	161	90	6.85	1.73	5.95	3.3	1.36	101	113	39	16	20	13
090137	2	58	160	57.5	1	1															6	3	127	86	5.8	1.51	5.67	2.89	1.32	88	100	33	15	22	29
090138	1	59	168	124	1	1															4	1	125	85	4.11	1.27	3.64	2.01	1.3	78	90	37	18	20	14
090139	2	58	162	62	1	1															6	3	150	90	6.5	1.76	6.73	3.72	1.43	96	110	35	17	21	28
090140	1	60	174	70	1	1			2												5	1	155	93	5.55	1.81	4.08	1.96	1.43	90	100	38	18	11	12
090201	1	53	172	74	1	1															6	1	150	90	4.64	0.83	6.43	4.58	1.24	98	98	41	19	30	32
090202	2	51	158	55																	6	1	120	80	3.82	0.88	3.98	1.75	1.69	80	96	34	16	20	21
090203	2	58	160	60																	6	1	120	80	4.88	1.43	5.98	3.2	1.64	80	100	38	16	20	26
090204	2	52	162	65																	6	1	120	80	4.18	1.4	5.15	2.78	1.66	80	100	38	16	22	24
090205	2	50	168	60	1	0															6	3	140	80	5.49	0.77	3.34	1.5	1.1	75	95	31	7.5	16	16
090206	2	55	160	65																	6	3	120	85	4.47	1.46	5.58	3.12	1.42	84	108	38	17	32	22
090207	1	50	174	75																	4	1	125	85	4.59	2.7	4.75	2.57	1.17	90	110	40	17	4	24
090208	2	47	160	59																	6	1	120	80	4.41	18.77	7.74	1.56	1.3	72	97	32	16	22	21
090209	1	51	170	70																	6	1	130	90	4.93	1.42	6.17	3.8	1.37	94	102	40	19	30	21
090210	2	47	164	70																	6	1	120	80	39	2.37	6.39	3.43	1.8	80	95	36	18	28	31
090211	1	46	179	70																	2	1	130	90	4.4	2.1	4.54	2.28	1.38	90	105	45	20	22	13
[truncated: 762 more rows]
